# Supplementary material
Source: MDPI journal article supplement (https://www.mdpi.com/2073-4441/14/15/2361)
Supplement: s1 [file s1]

Supplementary Materials: Supporting information for review and publication

Journal: Water

Title: Developing indicators of nutrient pollution in streams using 16S rRNA gene  
metabarcoding of periphyton-associated bacteria

Authors: Erik M. Pilgrim, Nathan J. Smucker, John Martinson, Huiyun Wu, Christopher T.  
Nietch, Marirosa Molina, John A. Darling, Brent R. Johnson

**Table S1.** Site Coordinates

| <b>Abbrev.</b> | <b>Site Name</b>            | <b>Latitude/Longitude</b> |
|----------------|-----------------------------|---------------------------|
| BBC            | Backbone Creek              | 39.0896 N 84.1690 W       |
| BRF            | Brushy Fork                 | 39.1387 N 84.1316 W       |
| FMC            | Fourmile Creek              | 39.0973 N 84.0262 W       |
| FMR            | Fourmile Run                | 39.0547 N 84.1678 W       |
| FVC            | Fivemile Creek              | 39.1136 N 84.0203 W       |
| GRR            | Grassy Fork                 | 39.1329 N 84.0152 W       |
| HLR            | Hall Run                    | 39.1403 N 84.2592 W       |
| HWR            | Howard Run                  | 39.1240 N 84.0073 W       |
| KAR            | Kain Run                    | 39.0333 N 84.0819 W       |
| LCF            | Lick Fork                   | 39.1472 N 84.1784 W       |
| LRC            | Lucy Run                    | 39.0597 N 84.1806 W       |
| LRN            | Light Run Trib              | 38.9930 N 84.0590 W       |
| MOF            | Moores Fork                 | 39.1977 N 84.0608 W       |
| PLR            | Pleasant Run                | 39.1125 N 84.0422 W       |
| S1             | Sugarcamp Run               | 39.1347 N 84.2325 W       |
| SAR            | Salt Run                    | 39.1372 N 84.2458 W       |
| SHO            | Shayler Run at Olive Branch | 39.0883 N 84.2217 W       |
| SHR            | Shayler Run at Perintown    | 39.1178 N 84.2164 W       |
| SOR            | Solomon Run                 | 39.2022 N 83.9097 W       |
| UST            | Stonelick Creek             | 39.2564 N 84.0125 W       |
| SYC            | Sycamore Creek              | 39.2058 N 83.9450 W       |
| FVM            | Upper Fivemile Creek        | 39.1073 N 83.9325 W       |
| 890            | Tributary To Dodson Creek   | 39.2043 N 83.7642 W       |
| ULR            | Ullery Run                  | 39.0021 N 84.1515 W       |
| USR            | Upper Salt Run              | 39.1171 N 84.2593 W       |

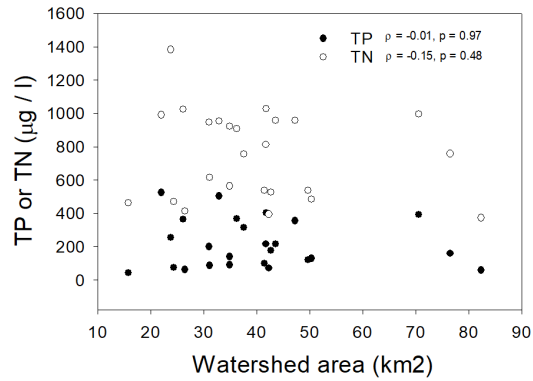

**Figure S1.** Comparison of TP and TN concentrations to watershed area.

**Table S2.** Total phosphorus TITAN results for amplicon sequence variants (ASV) with >95% purity and 95% reliability, change points (CP), sample frequencies (Freq), z-scores, and percentile distributions of bootstrapped change points. Indicator column denotes high P or low P ASVs that increased or decreased, respectively, with greater TP concentrations.

| ASV    | CP     | Freq | % Freq | Z-Score | 0.05   | 0.10   | 0.50   | 0.90   | 0.95   | Indicator |
|--------|--------|------|--------|---------|--------|--------|--------|--------|--------|-----------|
| ASV18  | 34.33  | 234  | 0.84   | 4.66    | 33.82  | 34.38  | 37.05  | 118.49 | 138.72 | high      |
| ASV39  | 50.79  | 184  | 0.66   | 4.08    | 39.38  | 41.20  | 51.73  | 460.46 | 691.47 | high      |
| ASV289 | 67.64  | 29   | 0.10   | 3.25    | 63.55  | 65.07  | 110.20 | 272.56 | 800.75 | high      |
| ASV398 | 72.16  | 70   | 0.25   | 3.53    | 44.86  | 50.70  | 102.47 | 182.20 | 414.97 | high      |
| ASV166 | 73.53  | 112  | 0.40   | 3.35    | 36.56  | 36.61  | 71.01  | 207.20 | 271.72 | high      |
| ASV5   | 76.71  | 267  | 0.95   | 8.92    | 60.61  | 67.62  | 76.93  | 100.90 | 102.47 | high      |
| ASV369 | 78.19  | 47   | 0.17   | 3.85    | 55.43  | 55.81  | 78.19  | 715.96 | 727.25 | high      |
| ASV27  | 99.02  | 111  | 0.40   | 10.85   | 86.49  | 93.81  | 102.13 | 158.41 | 175.23 | high      |
| ASV49  | 99.02  | 231  | 0.83   | 9.11    | 69.83  | 71.90  | 96.31  | 102.47 | 116.35 | high      |
| ASV156 | 102.13 | 71   | 0.25   | 3.63    | 74.21  | 75.60  | 221.70 | 428.35 | 449.39 | high      |
| ASV24  | 108.89 | 237  | 0.85   | 4.87    | 44.29  | 63.38  | 155.00 | 460.46 | 470.53 | high      |
| ASV211 | 108.89 | 45   | 0.16   | 4.80    | 72.16  | 77.71  | 114.21 | 188.10 | 591.65 | high      |
| ASV69  | 111.20 | 95   | 0.34   | 11.00   | 109.76 | 109.91 | 113.20 | 182.75 | 263.94 | high      |
| ASV55  | 112.61 | 77   | 0.28   | 6.01    | 101.00 | 111.20 | 177.27 | 490.72 | 490.72 | high      |
| ASV50  | 116.35 | 135  | 0.48   | 4.49    | 38.80  | 67.20  | 120.18 | 177.03 | 265.88 | high      |
| ASV116 | 116.35 | 183  | 0.65   | 6.09    | 110.77 | 111.49 | 155.60 | 406.17 | 415.48 | high      |
| ASV314 | 116.35 | 30   | 0.11   | 6.38    | 113.11 | 114.13 | 213.29 | 477.51 | 488.64 | high      |
| ASV397 | 116.35 | 31   | 0.11   | 4.98    | 113.20 | 114.13 | 216.31 | 490.72 | 508.77 | high      |
| ASV54  | 118.81 | 203  | 0.73   | 5.28    | 111.20 | 113.62 | 118.81 | 442.51 | 460.46 | high      |
| ASV155 | 118.81 | 115  | 0.41   | 3.73    | 71.01  | 116.35 | 155.34 | 431.05 | 483.40 | high      |
| ASV198 | 122.80 | 119  | 0.43   | 4.85    | 37.30  | 48.05  | 122.80 | 291.49 | 557.52 | high      |
| ASV388 | 122.80 | 111  | 0.40   | 6.17    | 119.83 | 121.52 | 123.18 | 243.27 | 274.33 | high      |
| ASV384 | 123.08 | 91   | 0.33   | 4.52    | 115.20 | 116.67 | 136.06 | 479.72 | 555.52 | high      |
| ASV178 | 123.47 | 44   | 0.16   | 3.72    | 73.27  | 102.13 | 129.78 | 305.73 | 540.60 | high      |
| ASV349 | 128.22 | 44   | 0.16   | 7.37    | 121.52 | 122.80 | 170.87 | 719.22 | 727.25 | high      |
| ASV4   | 129.57 | 241  | 0.86   | 7.68    | 123.08 | 125.80 | 143.98 | 210.07 | 223.04 | high      |
| ASV111 | 129.57 | 153  | 0.55   | 5.04    | 50.08  | 121.08 | 159.71 | 285.90 | 369.40 | high      |
| ASV129 | 129.90 | 101  | 0.36   | 8.98    | 123.08 | 125.39 | 182.75 | 269.73 | 272.33 | high      |

|        |        |     |      |       |        |        |        |        |        |      |
|--------|--------|-----|------|-------|--------|--------|--------|--------|--------|------|
| ASV141 | 129.90 | 166 | 0.59 | 6.52  | 119.83 | 121.52 | 221.07 | 395.90 | 411.49 | high |
| ASV324 | 129.90 | 37  | 0.13 | 5.45  | 118.44 | 122.80 | 162.25 | 537.74 | 683.45 | high |
| ASV365 | 130.74 | 89  | 0.32 | 10.52 | 110.63 | 111.20 | 155.00 | 243.06 | 329.61 | high |
| ASV113 | 133.20 | 102 | 0.36 | 11.51 | 129.69 | 129.90 | 162.25 | 307.92 | 364.06 | high |
| ASV301 | 136.06 | 65  | 0.23 | 6.56  | 129.78 | 131.37 | 157.56 | 232.70 | 271.26 | high |
| ASV330 | 136.06 | 77  | 0.28 | 5.30  | 122.51 | 127.02 | 139.44 | 732.72 | 768.50 | high |
| ASV37  | 137.70 | 119 | 0.43 | 6.92  | 76.70  | 112.02 | 139.52 | 395.50 | 477.51 | high |
| ASV93  | 137.70 | 118 | 0.42 | 7.84  | 130.73 | 135.23 | 180.33 | 343.67 | 364.75 | high |
| ASV297 | 138.72 | 107 | 0.38 | 13.50 | 123.08 | 124.44 | 146.89 | 210.69 | 210.88 | high |
| ASV78  | 139.29 | 97  | 0.35 | 5.77  | 100.38 | 102.13 | 210.69 | 313.38 | 557.52 | high |
| ASV197 | 139.29 | 143 | 0.51 | 10.72 | 130.74 | 138.72 | 175.95 | 256.71 | 273.39 | high |
| ASV53  | 139.52 | 163 | 0.58 | 4.87  | 129.90 | 137.70 | 188.63 | 513.59 | 768.50 | high |
| ASV62  | 143.98 | 102 | 0.36 | 2.71  | 43.73  | 72.39  | 173.22 | 604.35 | 630.30 | high |
| ASV209 | 143.98 | 131 | 0.47 | 4.13  | 138.95 | 142.18 | 182.14 | 324.21 | 423.41 | high |
| ASV109 | 147.68 | 136 | 0.49 | 7.33  | 124.23 | 129.90 | 149.88 | 180.94 | 205.57 | high |
| ASV114 | 153.97 | 67  | 0.24 | 8.67  | 119.13 | 123.85 | 155.34 | 440.83 | 505.93 | high |
| ASV77  | 155.34 | 159 | 0.57 | 6.14  | 78.19  | 81.60  | 155.86 | 402.12 | 424.85 | high |
| ASV428 | 155.34 | 51  | 0.18 | 4.00  | 67.64  | 79.73  | 163.94 | 281.92 | 290.12 | high |
| ASV148 | 156.20 | 99  | 0.35 | 5.78  | 154.32 | 156.66 | 180.33 | 434.33 | 490.72 | high |
| ASV32  | 157.17 | 167 | 0.60 | 5.58  | 138.72 | 155.26 | 208.30 | 435.68 | 439.80 | high |
| ASV43  | 162.25 | 190 | 0.68 | 3.24  | 36.30  | 119.51 | 159.38 | 719.22 | 727.25 | high |
| ASV181 | 162.25 | 105 | 0.38 | 3.44  | 86.49  | 98.58  | 162.25 | 431.05 | 478.68 | high |
| ASV335 | 163.94 | 33  | 0.12 | 6.09  | 149.88 | 152.95 | 205.70 | 680.18 | 727.25 | high |
| ASV300 | 166.36 | 92  | 0.33 | 4.33  | 137.67 | 139.11 | 180.33 | 335.14 | 679.82 | high |
| ASV176 | 170.35 | 90  | 0.32 | 9.54  | 111.45 | 116.35 | 151.77 | 177.29 | 206.88 | high |
| ASV343 | 170.35 | 30  | 0.11 | 9.05  | 141.39 | 163.94 | 171.19 | 486.99 | 513.59 | high |
| ASV194 | 176.88 | 132 | 0.47 | 8.84  | 119.51 | 120.53 | 176.80 | 362.60 | 402.15 | high |
| ASV212 | 176.88 | 80  | 0.29 | 9.12  | 123.47 | 128.22 | 178.53 | 208.36 | 210.69 | high |
| ASV305 | 176.88 | 16  | 0.06 | 4.07  | 168.21 | 171.23 | 177.00 | 494.12 | 653.87 | high |
| ASV353 | 177.27 | 67  | 0.24 | 8.84  | 148.86 | 156.66 | 214.45 | 334.97 | 349.55 | high |
| ASV219 | 180.33 | 117 | 0.42 | 8.26  | 146.20 | 148.07 | 177.03 | 271.29 | 308.69 | high |
| ASV363 | 180.33 | 25  | 0.09 | 4.63  | 156.66 | 176.69 | 208.30 | 477.51 | 494.12 | high |
| ASV407 | 180.33 | 71  | 0.25 | 6.70  | 110.32 | 111.20 | 182.14 | 483.40 | 485.48 | high |
| ASV40  | 182.75 | 194 | 0.69 | 4.77  | 36.91  | 42.53  | 157.17 | 424.12 | 464.20 | high |
| ASV108 | 182.75 | 205 | 0.73 | 6.06  | 76.70  | 130.10 | 185.96 | 517.61 | 571.70 | high |
| ASV208 | 182.75 | 70  | 0.25 | 8.10  | 161.06 | 162.81 | 286.35 | 397.01 | 510.84 | high |
| ASV310 | 194.69 | 44  | 0.16 | 11.13 | 131.37 | 137.08 | 196.21 | 361.86 | 557.52 | high |
| ASV377 | 194.69 | 49  | 0.18 | 4.64  | 50.13  | 116.34 | 189.75 | 392.20 | 755.00 | high |
| ASV140 | 205.70 | 82  | 0.29 | 11.34 | 133.20 | 138.88 | 188.63 | 226.80 | 306.78 | high |
| ASV404 | 206.21 | 74  | 0.26 | 7.22  | 198.06 | 205.82 | 271.41 | 431.05 | 500.58 | high |
| ASV75  | 208.89 | 152 | 0.54 | 4.37  | 92.26  | 122.48 | 210.85 | 679.82 | 679.82 | high |
| ASV215 | 210.69 | 67  | 0.24 | 6.66  | 119.83 | 206.80 | 216.01 | 247.51 | 274.85 | high |
| ASV416 | 211.55 | 44  | 0.16 | 10.83 | 121.52 | 139.29 | 251.66 | 467.45 | 485.02 | high |
| ASV74  | 214.82 | 159 | 0.57 | 6.97  | 211.70 | 213.29 | 216.57 | 271.29 | 276.82 | high |
| ASV71  | 214.82 | 157 | 0.56 | 5.40  | 85.80  | 98.02  | 214.78 | 310.00 | 364.14 | high |
| ASV291 | 214.82 | 20  | 0.07 | 6.99  | 138.11 | 158.92 | 243.50 | 369.40 | 427.67 | high |
| ASV395 | 214.82 | 49  | 0.18 | 4.76  | 205.69 | 212.98 | 272.32 | 727.25 | 727.25 | high |
| ASV193 | 216.01 | 66  | 0.24 | 5.46  | 133.20 | 153.97 | 256.71 | 679.82 | 768.50 | high |

|        |        |     |      |       |        |        |        |        |        |      |
|--------|--------|-----|------|-------|--------|--------|--------|--------|--------|------|
| ASV306 | 222.34 | 29  | 0.10 | 6.95  | 207.79 | 210.00 | 239.07 | 362.49 | 483.40 | high |
| ASV303 | 236.25 | 103 | 0.37 | 3.17  | 50.71  | 60.74  | 236.25 | 346.76 | 380.89 | high |
| ASV168 | 243.27 | 104 | 0.37 | 8.29  | 195.01 | 236.25 | 247.49 | 354.41 | 364.03 | high |
| ASV402 | 269.71 | 43  | 0.15 | 15.87 | 267.21 | 269.71 | 275.39 | 293.88 | 298.70 | high |
| ASV295 | 271.43 | 83  | 0.30 | 9.68  | 160.60 | 163.94 | 271.43 | 315.44 | 364.43 | high |
| ASV408 | 278.75 | 22  | 0.08 | 5.89  | 101.00 | 119.13 | 285.85 | 537.79 | 719.22 | high |
| ASV94  | 281.07 | 94  | 0.34 | 6.33  | 48.37  | 270.77 | 290.12 | 516.42 | 517.35 | high |
| ASV432 | 285.85 | 28  | 0.10 | 5.37  | 99.39  | 101.33 | 285.35 | 335.14 | 347.11 | high |
| ASV12  | 294.26 | 81  | 0.29 | 11.56 | 171.18 | 176.11 | 269.87 | 301.27 | 305.73 | high |
| ASV200 | 294.26 | 84  | 0.30 | 5.79  | 123.47 | 214.82 | 332.37 | 377.63 | 650.25 | high |
| ASV302 | 294.26 | 49  | 0.18 | 11.00 | 153.97 | 212.90 | 294.63 | 380.89 | 395.90 | high |
| ASV451 | 305.71 | 47  | 0.17 | 9.24  | 163.94 | 227.51 | 273.81 | 359.23 | 373.55 | high |
| ASV124 | 307.92 | 67  | 0.24 | 12.55 | 214.85 | 222.34 | 301.27 | 320.83 | 407.41 | high |
| ASV146 | 307.92 | 101 | 0.36 | 10.26 | 146.95 | 160.50 | 298.70 | 392.20 | 393.31 | high |
| ASV391 | 307.92 | 27  | 0.10 | 5.84  | 241.02 | 245.21 | 313.37 | 727.25 | 727.25 | high |
| ASV97  | 310.00 | 101 | 0.36 | 9.67  | 138.11 | 139.59 | 209.59 | 335.14 | 335.14 | high |
| ASV128 | 362.60 | 114 | 0.41 | 8.69  | 177.09 | 182.75 | 365.84 | 471.18 | 477.51 | high |
| ASV143 | 362.60 | 54  | 0.19 | 9.72  | 255.84 | 318.82 | 363.32 | 453.06 | 470.53 | high |
| ASV224 | 362.60 | 60  | 0.21 | 6.39  | 216.27 | 221.64 | 362.49 | 422.36 | 477.51 | high |
| ASV61  | 365.84 | 118 | 0.42 | 4.26  | 142.11 | 147.95 | 392.20 | 520.19 | 569.70 | high |
| ASV151 | 369.40 | 127 | 0.45 | 9.84  | 111.74 | 114.21 | 355.78 | 369.13 | 377.59 | high |
| ASV142 | 396.61 | 84  | 0.30 | 3.59  | 57.61  | 62.85  | 272.47 | 421.28 | 460.46 | high |
| ASV351 | 396.61 | 26  | 0.09 | 6.76  | 138.11 | 161.06 | 411.22 | 495.45 | 500.58 | high |
| ASV431 | 396.61 | 18  | 0.06 | 6.28  | 349.89 | 353.96 | 395.50 | 485.48 | 490.72 | high |
| ASV160 | 397.01 | 75  | 0.27 | 8.44  | 274.72 | 364.14 | 397.01 | 488.98 | 494.12 | high |
| ASV237 | 397.01 | 21  | 0.08 | 7.85  | 156.20 | 157.17 | 380.89 | 755.00 | 768.50 | high |
| ASV231 | 402.13 | 30  | 0.11 | 4.05  | 67.37  | 71.01  | 369.40 | 470.53 | 483.51 | high |
| ASV192 | 408.53 | 69  | 0.25 | 4.26  | 56.12  | 177.90 | 417.21 | 497.38 | 500.58 | high |
| ASV316 | 408.53 | 140 | 0.50 | 3.87  | 36.61  | 43.34  | 324.00 | 445.27 | 476.89 | high |
| ASV385 | 408.53 | 21  | 0.08 | 5.33  | 110.93 | 196.06 | 405.46 | 412.56 | 412.57 | high |
| ASV202 | 411.87 | 28  | 0.10 | 10.18 | 258.90 | 261.98 | 396.05 | 466.79 | 470.53 | high |
| ASV277 | 411.87 | 37  | 0.13 | 9.92  | 213.87 | 226.80 | 354.80 | 422.36 | 466.98 | high |
| ASV345 | 411.87 | 23  | 0.08 | 7.57  | 315.44 | 380.83 | 415.45 | 486.15 | 494.12 | high |
| ASV19  | 423.41 | 228 | 0.81 | 2.29  | 29.19  | 29.25  | 128.22 | 431.05 | 563.45 | high |
| ASV131 | 431.05 | 65  | 0.23 | 5.07  | 179.45 | 210.85 | 381.74 | 442.51 | 460.81 | high |
| ASV177 | 436.52 | 87  | 0.31 | 4.65  | 83.20  | 99.26  | 392.20 | 463.12 | 466.79 | high |
| ASV267 | 436.52 | 71  | 0.25 | 4.52  | 87.24  | 97.87  | 364.08 | 691.47 | 691.47 | high |
| ASV145 | 460.46 | 96  | 0.34 | 7.67  | 112.61 | 116.64 | 449.39 | 470.53 | 488.64 | high |
| ASV276 | 460.46 | 40  | 0.14 | 4.86  | 69.97  | 194.82 | 477.18 | 490.72 | 492.04 | high |
| ASV125 | 470.53 | 82  | 0.29 | 4.90  | 60.61  | 143.98 | 412.56 | 471.18 | 476.42 | high |
| ASV169 | 470.53 | 84  | 0.30 | 3.45  | 47.80  | 70.10  | 256.71 | 485.48 | 505.93 | high |
| ASV180 | 470.53 | 40  | 0.14 | 12.78 | 396.61 | 442.51 | 466.79 | 474.76 | 477.51 | high |
| ASV268 | 470.53 | 64  | 0.23 | 8.58  | 108.81 | 109.76 | 195.48 | 470.53 | 490.72 | high |
| ASV59  | 477.51 | 72  | 0.26 | 4.76  | 136.06 | 359.72 | 477.51 | 499.26 | 559.54 | high |
| ASV261 | 477.51 | 69  | 0.25 | 3.31  | 58.98  | 63.38  | 242.28 | 477.51 | 488.74 | high |
| ASV319 | 477.51 | 45  | 0.16 | 9.10  | 216.31 | 396.96 | 483.40 | 523.10 | 571.70 | high |
| ASV321 | 477.51 | 29  | 0.10 | 5.92  | 196.08 | 247.49 | 426.82 | 505.93 | 729.28 | high |
| ASV352 | 483.40 | 19  | 0.07 | 7.75  | 141.16 | 156.30 | 477.84 | 510.84 | 630.30 | high |

|        |        |     |      |       |        |        |        |        |        |      |
|--------|--------|-----|------|-------|--------|--------|--------|--------|--------|------|
| ASV429 | 483.40 | 39  | 0.14 | 9.18  | 141.39 | 182.02 | 467.45 | 490.72 | 492.08 | high |
| ASV183 | 490.72 | 88  | 0.31 | 6.76  | 140.86 | 143.19 | 439.12 | 490.72 | 492.80 | high |
| ASV247 | 490.72 | 40  | 0.14 | 12.37 | 392.90 | 396.21 | 485.48 | 505.74 | 506.20 | high |
| ASV199 | 494.12 | 56  | 0.20 | 8.43  | 393.05 | 395.90 | 483.40 | 507.44 | 591.65 | high |
| ASV48  | 500.58 | 94  | 0.34 | 5.67  | 167.21 | 356.62 | 470.53 | 500.80 | 538.25 | high |
| ASV299 | 510.84 | 53  | 0.19 | 8.24  | 109.76 | 120.53 | 359.68 | 511.48 | 520.19 | high |
| ASV392 | 510.84 | 88  | 0.31 | 9.79  | 123.08 | 128.54 | 510.84 | 691.47 | 691.47 | high |
| ASV250 | 520.19 | 57  | 0.20 | 6.62  | 208.28 | 271.43 | 510.84 | 590.16 | 699.50 | high |
| ASV68  | 537.74 | 106 | 0.38 | 3.04  | 65.07  | 123.08 | 396.61 | 719.22 | 727.25 | high |
| ASV171 | 679.82 | 44  | 0.16 | 7.28  | 155.34 | 206.06 | 510.84 | 727.25 | 727.25 | high |
| ASV11  | 691.47 | 176 | 0.63 | 3.20  | 29.25  | 29.25  | 352.36 | 691.47 | 691.47 | high |
| ASV331 | 691.47 | 77  | 0.28 | 4.88  | 50.79  | 67.78  | 511.25 | 691.47 | 715.60 | high |
| ASV284 | 768.50 | 45  | 0.16 | 6.25  | 51.73  | 193.90 | 699.50 | 768.50 | 787.25 | high |
| ASV364 | 768.50 | 33  | 0.12 | 8.28  | 195.88 | 217.83 | 307.92 | 768.50 | 787.25 | high |
| ASV84  | 29.04  | 107 | 0.38 | 7.67  | 27.48  | 27.63  | 44.96  | 108.02 | 139.52 | low  |
| ASV102 | 29.04  | 72  | 0.26 | 5.76  | 21.99  | 23.78  | 29.04  | 261.97 | 354.03 | low  |
| ASV164 | 31.41  | 88  | 0.31 | 7.79  | 30.60  | 30.75  | 39.90  | 77.19  | 95.73  | low  |
| ASV285 | 31.41  | 82  | 0.29 | 6.01  | 29.10  | 29.19  | 31.41  | 75.81  | 87.77  | low  |
| ASV467 | 31.41  | 35  | 0.13 | 10.17 | 29.19  | 29.25  | 31.41  | 60.97  | 123.47 | low  |
| ASV57  | 32.65  | 165 | 0.59 | 5.16  | 32.15  | 32.30  | 49.23  | 130.18 | 349.92 | low  |
| ASV230 | 33.83  | 36  | 0.13 | 5.30  | 27.09  | 32.15  | 45.45  | 177.11 | 202.95 | low  |
| ASV355 | 33.83  | 57  | 0.20 | 4.46  | 29.25  | 31.65  | 34.10  | 98.90  | 237.50 | low  |
| ASV290 | 38.18  | 27  | 0.10 | 9.84  | 31.41  | 32.30  | 43.73  | 76.52  | 102.25 | low  |
| ASV463 | 38.18  | 7   | 0.03 | 11.48 | 31.47  | 35.85  | 38.18  | 75.83  | 76.45  | low  |
| ASV442 | 42.68  | 30  | 0.11 | 9.45  | 30.73  | 34.33  | 37.15  | 43.83  | 44.76  | low  |
| ASV82  | 50.08  | 93  | 0.33 | 6.82  | 32.15  | 32.19  | 50.31  | 110.10 | 113.63 | low  |
| ASV204 | 50.08  | 85  | 0.30 | 5.57  | 40.73  | 41.20  | 47.53  | 58.85  | 276.48 | low  |
| ASV123 | 50.70  | 62  | 0.22 | 5.77  | 43.71  | 50.00  | 86.54  | 195.82 | 290.12 | low  |
| ASV23  | 51.74  | 183 | 0.65 | 5.43  | 44.98  | 48.07  | 55.81  | 396.21 | 407.31 | low  |
| ASV334 | 53.44  | 39  | 0.14 | 5.29  | 33.23  | 33.25  | 53.44  | 271.27 | 326.89 | low  |
| ASV344 | 53.44  | 62  | 0.22 | 5.68  | 33.83  | 40.58  | 54.14  | 218.09 | 278.80 | low  |
| ASV36  | 55.81  | 169 | 0.60 | 5.42  | 47.92  | 48.15  | 69.97  | 417.23 | 418.33 | low  |
| ASV161 | 56.37  | 70  | 0.25 | 10.05 | 34.65  | 36.56  | 50.80  | 57.45  | 61.27  | low  |
| ASV245 | 56.37  | 37  | 0.13 | 5.35  | 24.45  | 32.30  | 50.16  | 105.16 | 265.35 | low  |
| ASV441 | 56.37  | 19  | 0.07 | 4.88  | 32.25  | 32.30  | 56.01  | 104.94 | 109.76 | low  |
| ASV234 | 56.80  | 59  | 0.21 | 10.69 | 37.25  | 42.47  | 56.80  | 97.42  | 102.59 | low  |
| ASV421 | 58.85  | 50  | 0.18 | 12.47 | 45.34  | 50.78  | 58.01  | 91.94  | 107.91 | low  |
| ASV240 | 60.74  | 77  | 0.28 | 4.53  | 29.04  | 33.00  | 57.87  | 76.53  | 286.62 | low  |
| ASV286 | 60.74  | 85  | 0.30 | 5.91  | 27.42  | 34.70  | 40.58  | 60.74  | 69.97  | low  |
| ASV362 | 60.74  | 38  | 0.14 | 8.56  | 43.32  | 53.15  | 62.50  | 100.90 | 216.02 | low  |
| ASV92  | 67.64  | 198 | 0.71 | 6.43  | 55.79  | 57.50  | 90.22  | 397.01 | 445.27 | low  |
| ASV218 | 78.19  | 52  | 0.19 | 5.17  | 29.09  | 76.45  | 80.55  | 265.88 | 271.27 | low  |
| ASV294 | 82.42  | 33  | 0.12 | 6.17  | 30.07  | 42.53  | 80.88  | 101.00 | 118.56 | low  |
| ASV185 | 84.47  | 59  | 0.21 | 3.89  | 56.80  | 62.85  | 83.24  | 424.80 | 460.46 | low  |
| ASV260 | 86.54  | 53  | 0.19 | 4.14  | 29.04  | 33.45  | 86.54  | 315.44 | 369.13 | low  |
| ASV122 | 87.52  | 32  | 0.11 | 7.57  | 73.53  | 80.88  | 88.40  | 130.93 | 170.35 | low  |
| ASV332 | 88.63  | 118 | 0.42 | 3.56  | 34.94  | 35.15  | 85.26  | 395.50 | 395.90 | low  |
| ASV73  | 89.74  | 190 | 0.68 | 5.20  | 42.53  | 43.34  | 88.52  | 92.26  | 248.18 | low  |

|        |        |     |      |       |        |        |        |        |        |     |
|--------|--------|-----|------|-------|--------|--------|--------|--------|--------|-----|
| ASV83  | 89.74  | 111 | 0.40 | 4.81  | 35.10  | 35.15  | 87.52  | 99.05  | 272.47 | low |
| ASV137 | 89.74  | 83  | 0.30 | 8.99  | 42.37  | 55.78  | 84.47  | 129.78 | 137.70 | low |
| ASV172 | 89.74  | 57  | 0.20 | 5.58  | 36.45  | 38.07  | 88.40  | 352.33 | 354.99 | low |
| ASV239 | 89.74  | 59  | 0.21 | 11.06 | 80.88  | 82.42  | 89.74  | 98.17  | 123.92 | low |
| ASV265 | 89.74  | 131 | 0.47 | 6.36  | 53.44  | 55.43  | 76.68  | 93.59  | 212.92 | low |
| ASV382 | 89.74  | 26  | 0.09 | 6.60  | 36.56  | 37.10  | 89.74  | 97.87  | 139.44 | low |
| ASV251 | 90.06  | 39  | 0.14 | 9.94  | 73.27  | 75.60  | 98.90  | 114.21 | 118.49 | low |
| ASV52  | 95.69  | 117 | 0.42 | 11.00 | 60.74  | 75.60  | 95.69  | 216.27 | 290.12 | low |
| ASV246 | 95.69  | 92  | 0.33 | 18.18 | 76.71  | 87.77  | 101.00 | 113.62 | 129.78 | low |
| ASV30  | 99.02  | 230 | 0.82 | 6.05  | 44.76  | 44.96  | 100.90 | 352.36 | 354.41 | low |
| ASV259 | 102.57 | 69  | 0.25 | 7.05  | 86.54  | 89.74  | 102.57 | 272.50 | 285.85 | low |
| ASV127 | 109.91 | 80  | 0.29 | 10.45 | 64.62  | 89.74  | 135.55 | 266.75 | 271.43 | low |
| ASV86  | 111.20 | 88  | 0.31 | 12.93 | 82.42  | 89.63  | 109.36 | 162.27 | 177.27 | low |
| ASV287 | 111.75 | 17  | 0.06 | 7.34  | 36.91  | 37.05  | 111.20 | 133.39 | 137.08 | low |
| ASV252 | 112.61 | 55  | 0.20 | 10.85 | 43.34  | 96.25  | 114.21 | 152.95 | 155.00 | low |
| ASV311 | 112.61 | 64  | 0.23 | 12.82 | 36.73  | 36.82  | 123.08 | 163.94 | 169.18 | low |
| ASV401 | 112.61 | 39  | 0.14 | 6.61  | 89.74  | 105.38 | 112.02 | 227.51 | 294.26 | low |
| ASV152 | 114.13 | 82  | 0.29 | 8.74  | 89.74  | 93.50  | 122.51 | 266.75 | 269.23 | low |
| ASV356 | 114.13 | 42  | 0.15 | 9.47  | 57.87  | 75.60  | 111.20 | 144.77 | 176.11 | low |
| ASV91  | 116.35 | 161 | 0.58 | 11.67 | 111.18 | 111.49 | 118.97 | 157.17 | 180.33 | low |
| ASV325 | 121.52 | 81  | 0.29 | 8.41  | 111.20 | 113.03 | 120.82 | 139.52 | 141.32 | low |
| ASV13  | 122.80 | 264 | 0.94 | 6.04  | 118.81 | 122.51 | 152.95 | 307.92 | 653.87 | low |
| ASV154 | 123.08 | 124 | 0.44 | 3.42  | 89.74  | 110.04 | 173.22 | 281.07 | 298.72 | low |
| ASV281 | 123.08 | 49  | 0.18 | 8.55  | 87.64  | 89.63  | 110.77 | 171.43 | 210.85 | low |
| ASV149 | 123.47 | 33  | 0.12 | 6.35  | 110.48 | 112.61 | 121.81 | 131.37 | 135.04 | low |
| ASV322 | 123.47 | 99  | 0.35 | 7.88  | 63.38  | 80.88  | 122.80 | 156.72 | 164.50 | low |
| ASV98  | 124.23 | 83  | 0.30 | 5.20  | 102.89 | 111.20 | 124.05 | 138.72 | 177.27 | low |
| ASV271 | 129.90 | 56  | 0.20 | 6.74  | 89.74  | 105.38 | 128.56 | 268.17 | 269.71 | low |
| ASV414 | 129.90 | 27  | 0.10 | 3.82  | 29.25  | 37.15  | 98.13  | 133.20 | 227.51 | low |
| ASV440 | 129.90 | 22  | 0.08 | 4.83  | 110.48 | 118.81 | 131.37 | 202.80 | 206.61 | low |
| ASV15  | 133.20 | 155 | 0.55 | 12.53 | 110.91 | 113.03 | 139.52 | 176.34 | 177.51 | low |
| ASV3   | 136.06 | 223 | 0.80 | 5.21  | 39.38  | 48.07  | 107.94 | 240.58 | 359.62 | low |
| ASV130 | 136.06 | 84  | 0.30 | 4.42  | 36.65  | 44.37  | 112.34 | 162.25 | 281.07 | low |
| ASV368 | 136.06 | 43  | 0.15 | 10.60 | 37.05  | 107.94 | 135.73 | 170.59 | 178.58 | low |
| ASV434 | 136.06 | 18  | 0.06 | 5.86  | 36.50  | 36.96  | 112.34 | 130.74 | 137.70 | low |
| ASV20  | 137.70 | 173 | 0.62 | 9.94  | 113.62 | 130.12 | 143.19 | 207.91 | 213.29 | low |
| ASV80  | 138.72 | 80  | 0.29 | 13.80 | 90.06  | 100.52 | 136.68 | 147.68 | 155.02 | low |
| ASV107 | 139.29 | 101 | 0.36 | 6.88  | 116.35 | 123.81 | 139.29 | 194.69 | 208.89 | low |
| ASV42  | 139.52 | 170 | 0.61 | 12.37 | 110.77 | 111.20 | 124.23 | 152.95 | 156.20 | low |
| ASV203 | 139.52 | 85  | 0.30 | 4.27  | 50.47  | 112.61 | 139.48 | 264.62 | 294.63 | low |
| ASV307 | 141.39 | 73  | 0.26 | 4.88  | 37.10  | 37.15  | 142.18 | 200.92 | 206.09 | low |
| ASV99  | 143.98 | 134 | 0.48 | 8.88  | 112.45 | 141.39 | 154.83 | 210.00 | 232.74 | low |
| ASV191 | 143.98 | 41  | 0.15 | 10.20 | 89.63  | 94.07  | 110.84 | 176.73 | 180.45 | low |
| ASV233 | 147.68 | 84  | 0.30 | 5.07  | 118.81 | 126.02 | 163.94 | 305.71 | 307.78 | low |
| ASV374 | 151.77 | 46  | 0.16 | 8.04  | 29.25  | 30.07  | 142.69 | 163.94 | 178.53 | low |
| ASV87  | 155.34 | 175 | 0.63 | 6.84  | 89.62  | 98.90  | 144.37 | 161.07 | 170.91 | low |
| ASV162 | 155.34 | 113 | 0.40 | 10.58 | 42.55  | 98.90  | 151.77 | 156.32 | 158.06 | low |
| ASV213 | 155.34 | 85  | 0.30 | 8.14  | 36.71  | 41.33  | 141.39 | 170.15 | 171.19 | low |

|        |        |     |      |      |        |        |        |        |        |     |
|--------|--------|-----|------|------|--------|--------|--------|--------|--------|-----|
| ASV9   | 157.17 | 231 | 0.83 | 9.20 | 113.62 | 136.98 | 168.23 | 198.34 | 217.83 | low |
| ASV147 | 163.94 | 52  | 0.19 | 3.78 | 30.07  | 45.92  | 163.94 | 271.27 | 335.14 | low |
| ASV266 | 169.18 | 104 | 0.37 | 3.99 | 130.48 | 156.17 | 202.80 | 267.69 | 281.11 | low |
| ASV1   | 177.27 | 280 | 1.00 | 6.77 | 133.20 | 137.70 | 180.38 | 354.99 | 359.73 | low |
| ASV117 | 198.15 | 116 | 0.41 | 4.74 | 121.43 | 137.70 | 202.80 | 347.32 | 354.99 | low |
| ASV47  | 202.80 | 108 | 0.39 | 6.10 | 36.30  | 36.56  | 171.23 | 212.17 | 214.45 | low |
| ASV272 | 206.21 | 35  | 0.13 | 5.64 | 118.81 | 130.53 | 170.87 | 207.91 | 209.60 | low |
| ASV38  | 214.82 | 131 | 0.47 | 4.92 | 32.15  | 48.16  | 182.14 | 223.04 | 276.44 | low |
| ASV81  | 236.25 | 125 | 0.45 | 4.05 | 76.45  | 89.73  | 272.47 | 395.93 | 477.51 | low |
| ASV51  | 245.44 | 161 | 0.58 | 5.56 | 180.33 | 182.75 | 247.49 | 395.50 | 423.41 | low |
| ASV64  | 245.44 | 143 | 0.51 | 4.50 | 48.07  | 72.17  | 247.37 | 503.31 | 507.44 | low |
| ASV396 | 247.49 | 35  | 0.13 | 4.18 | 50.08  | 73.53  | 216.31 | 264.14 | 266.27 | low |
| ASV70  | 260.62 | 147 | 0.53 | 3.22 | 52.50  | 98.83  | 260.62 | 420.23 | 446.63 | low |
| ASV2   | 261.18 | 264 | 0.94 | 6.05 | 139.29 | 170.35 | 261.43 | 483.74 | 507.44 | low |
| ASV31  | 280.26 | 207 | 0.74 | 3.42 | 85.72  | 195.88 | 281.02 | 417.23 | 719.22 | low |
| ASV273 | 285.85 | 40  | 0.14 | 4.98 | 37.15  | 50.70  | 269.71 | 289.99 | 299.27 | low |
| ASV21  | 341.20 | 218 | 0.78 | 7.02 | 280.17 | 282.73 | 299.07 | 363.32 | 365.56 | low |
| ASV360 | 341.20 | 54  | 0.19 | 3.37 | 35.10  | 35.15  | 317.11 | 346.76 | 349.59 | low |
| ASV7   | 354.41 | 255 | 0.91 | 4.55 | 97.21  | 99.02  | 247.49 | 365.08 | 373.55 | low |
| ASV22  | 354.41 | 223 | 0.80 | 3.73 | 55.23  | 102.91 | 263.39 | 355.39 | 364.77 | low |
| ASV29  | 453.06 | 194 | 0.69 | 6.21 | 89.74  | 247.05 | 450.30 | 470.53 | 471.18 | low |
| ASV67  | 460.46 | 95  | 0.34 | 2.80 | 30.75  | 55.51  | 290.49 | 464.20 | 467.45 | low |
| ASV16  | 557.52 | 214 | 0.76 | 3.74 | 121.86 | 147.68 | 286.35 | 557.52 | 590.24 | low |

---

**Table S3.** Total nitrogen TITAN results for amplicon sequence variants (ASV) with >95% purity and 95% reliability, change points (CP), sample frequencies (Freq), z-scores, and percentile distributions of bootstrapped change points. Indicator column denotes high N or low N ASVs that increased or decreased, respectively, with greater TN concentrations.

| ASV    | CP    | Freq | % Freq | Z-Score | 0.05 | 0.1 | 0.5 | 0.9  | 0.95 | Indicator |
|--------|-------|------|--------|---------|------|-----|-----|------|------|-----------|
| ASV50  | 404   | 134  | 0.48   | 3.55    | 289  | 306 | 465 | 1908 | 2045 | high      |
| ASV113 | 405.5 | 102  | 0.36   | 4.38    | 405  | 406 | 646 | 1205 | 2060 | high      |
| ASV146 | 405.5 | 101  | 0.36   | 3.46    | 358  | 403 | 642 | 825  | 886  | high      |
| ASV324 | 405.5 | 37   | 0.13   | 3.70    | 405  | 406 | 423 | 2360 | 2370 | high      |
| ASV248 | 409.5 | 44   | 0.16   | 3.65    | 402  | 404 | 610 | 809  | 836  | high      |
| ASV310 | 413.5 | 44   | 0.16   | 4.01    | 396  | 405 | 426 | 864  | 1820 | high      |
| ASV373 | 432   | 34   | 0.12   | 3.85    | 426  | 430 | 574 | 1885 | 1908 | high      |
| ASV402 | 560   | 43   | 0.15   | 4.53    | 519  | 533 | 680 | 1012 | 1145 | high      |
| ASV4   | 629.5 | 241  | 0.86   | 6.72    | 455  | 519 | 744 | 809  | 852  | high      |
| ASV75  | 629.5 | 152  | 0.54   | 3.90    | 352  | 617 | 805 | 1800 | 2370 | high      |
| ASV219 | 629.5 | 117  | 0.42   | 4.41    | 458  | 625 | 730 | 878  | 1800 | high      |
| ASV295 | 635.5 | 81   | 0.29   | 4.84    | 553  | 560 | 778 | 1052 | 1178 | high      |
| ASV212 | 639   | 81   | 0.29   | 3.76    | 402  | 410 | 757 | 825  | 902  | high      |
| ASV451 | 639   | 46   | 0.16   | 6.43    | 479  | 508 | 641 | 851  | 860  | high      |
| ASV109 | 665   | 137  | 0.49   | 5.61    | 418  | 606 | 665 | 884  | 1739 | high      |
| ASV365 | 679.5 | 90   | 0.32   | 10.61   | 664  | 667 | 682 | 812  | 851  | high      |
| ASV69  | 685   | 97   | 0.35   | 8.58    | 665  | 682 | 698 | 861  | 948  | high      |
| ASV145 | 685   | 97   | 0.35   | 4.68    | 465  | 639 | 713 | 1868 | 2045 | high      |
| ASV24  | 689.5 | 238  | 0.85   | 4.36    | 504  | 668 | 716 | 1290 | 1330 | high      |
| ASV183 | 696.5 | 90   | 0.32   | 5.69    | 465  | 683 | 698 | 900  | 1285 | high      |
| ASV305 | 696.5 | 17   | 0.06   | 3.69    | 543  | 685 | 705 | 743  | 809  | high      |
| ASV407 | 696.5 | 74   | 0.26   | 7.15    | 681  | 686 | 697 | 1291 | 1440 | high      |
| ASV416 | 696.5 | 44   | 0.16   | 8.54    | 667  | 669 | 787 | 1315 | 1440 | high      |
| ASV32  | 704.5 | 168  | 0.60   | 8.18    | 669  | 687 | 698 | 806  | 1502 | high      |
| ASV237 | 713   | 21   | 0.07   | 6.89    | 674  | 677 | 785 | 1135 | 1290 | high      |
| ASV148 | 721   | 101  | 0.36   | 4.64    | 576  | 647 | 812 | 1184 | 1670 | high      |
| ASV255 | 721   | 66   | 0.23   | 3.97    | 399  | 402 | 721 | 1201 | 2051 | high      |
| ASV72  | 727.5 | 103  | 0.37   | 4.78    | 660  | 669 | 795 | 2065 | 2065 | high      |
| ASV353 | 759   | 65   | 0.23   | 8.34    | 637  | 647 | 772 | 798  | 855  | high      |
| ASV377 | 759   | 49   | 0.17   | 7.02    | 737  | 754 | 775 | 825  | 841  | high      |
| ASV5   | 771.5 | 267  | 0.95   | 7.50    | 630  | 684 | 771 | 824  | 836  | high      |
| ASV49  | 771.5 | 231  | 0.82   | 7.81    | 626  | 634 | 759 | 823  | 915  | high      |
| ASV200 | 771.5 | 83   | 0.30   | 4.79    | 466  | 519 | 776 | 872  | 879  | high      |
| ASV302 | 771.5 | 48   | 0.17   | 5.60    | 625  | 631 | 774 | 873  | 876  | high      |
| ASV300 | 771.5 | 91   | 0.32   | 5.14    | 504  | 736 | 775 | 886  | 907  | high      |
| ASV335 | 771.5 | 32   | 0.11   | 3.78    | 408  | 410 | 772 | 930  | 2361 | high      |
| ASV12  | 780.5 | 82   | 0.29   | 7.08    | 558  | 563 | 658 | 781  | 809  | high      |
| ASV124 | 782.5 | 66   | 0.23   | 6.55    | 667  | 672 | 796 | 943  | 1285 | high      |
| ASV151 | 784.5 | 126  | 0.45   | 4.74    | 432  | 465 | 696 | 1210 | 1220 | high      |
| ASV297 | 784.5 | 106  | 0.38   | 9.99    | 688  | 715 | 785 | 823  | 828  | high      |
| ASV388 | 784.5 | 112  | 0.40   | 6.12    | 519  | 617 | 805 | 1575 | 1785 | high      |

|        |       |     |      |       |     |      |      |      |      |      |
|--------|-------|-----|------|-------|-----|------|------|------|------|------|
| ASV397 | 784.5 | 31  | 0.11 | 7.22  | 715 | 760  | 806  | 1440 | 1730 | high |
| ASV54  | 796.5 | 204 | 0.73 | 6.05  | 660 | 665  | 794  | 895  | 1715 | high |
| ASV155 | 796.5 | 116 | 0.41 | 7.08  | 595 | 605  | 723  | 972  | 1061 | high |
| ASV176 | 796.5 | 90  | 0.32 | 13.24 | 688 | 698  | 798  | 886  | 902  | high |
| ASV314 | 804.5 | 29  | 0.10 | 7.60  | 694 | 796  | 825  | 1500 | 1715 | high |
| ASV129 | 807.5 | 102 | 0.36 | 3.64  | 365 | 404  | 785  | 2045 | 2340 | high |
| ASV140 | 811.5 | 82  | 0.29 | 6.39  | 620 | 646  | 809  | 1205 | 1683 | high |
| ASV141 | 811.5 | 165 | 0.59 | 6.84  | 674 | 681  | 806  | 1012 | 1145 | high |
| ASV298 | 811.5 | 55  | 0.20 | 7.51  | 705 | 783  | 812  | 1108 | 1215 | high |
| ASV27  | 822.5 | 112 | 0.40 | 9.40  | 687 | 729  | 823  | 855  | 872  | high |
| ASV432 | 822.5 | 28  | 0.10 | 5.74  | 606 | 776  | 876  | 2747 | 3019 | high |
| ASV197 | 824.5 | 144 | 0.51 | 11.20 | 700 | 780  | 821  | 1060 | 1130 | high |
| ASV111 | 825   | 154 | 0.55 | 6.11  | 621 | 636  | 823  | 1195 | 1211 | high |
| ASV349 | 829.5 | 44  | 0.16 | 6.48  | 405 | 416  | 830  | 903  | 915  | high |
| ASV304 | 861   | 42  | 0.15 | 4.46  | 452 | 458  | 869  | 1210 | 1800 | high |
| ASV71  | 871.5 | 156 | 0.56 | 5.22  | 509 | 647  | 869  | 1035 | 1158 | high |
| ASV198 | 1010  | 119 | 0.42 | 4.63  | 615 | 619  | 1011 | 1738 | 1795 | high |
| ASV55  | 1025  | 78  | 0.28 | 5.48  | 464 | 594  | 1015 | 1440 | 1480 | high |
| ASV319 | 1025  | 47  | 0.17 | 4.54  | 432 | 690  | 1025 | 1575 | 1575 | high |
| ASV392 | 1035  | 87  | 0.31 | 3.92  | 410 | 641  | 1030 | 1690 | 1765 | high |
| ASV114 | 1130  | 66  | 0.23 | 9.85  | 710 | 734  | 1110 | 1280 | 1285 | high |
| ASV268 | 1215  | 65  | 0.23 | 8.30  | 598 | 686  | 958  | 1255 | 1280 | high |
| ASV108 | 1230  | 206 | 0.73 | 6.13  | 896 | 915  | 1195 | 1250 | 1280 | high |
| ASV429 | 1285  | 40  | 0.14 | 7.28  | 690 | 698  | 1280 | 1420 | 1451 | high |
| ASV277 | 1440  | 37  | 0.13 | 7.33  | 601 | 759  | 1390 | 1620 | 1985 | high |
| ASV156 | 1500  | 71  | 0.25 | 9.09  | 687 | 974  | 1460 | 1560 | 1765 | high |
| ASV363 | 1670  | 26  | 0.09 | 4.96  | 637 | 669  | 1615 | 1738 | 2095 | high |
| ASV125 | 1690  | 82  | 0.29 | 5.26  | 467 | 1372 | 1715 | 2065 | 2190 | high |
| ASV231 | 1715  | 30  | 0.11 | 5.26  | 464 | 465  | 1705 | 1820 | 1985 | high |
| ASV238 | 1765  | 87  | 0.31 | 4.01  | 282 | 283  | 1555 | 1795 | 1800 | high |
| ASV289 | 1820  | 29  | 0.10 | 5.07  | 633 | 688  | 1045 | 2190 | 2205 | high |
| ASV215 | 1840  | 66  | 0.23 | 5.55  | 573 | 633  | 1480 | 1908 | 1963 | high |
| ASV364 | 2370  | 33  | 0.12 | 5.43  | 403 | 409  | 911  | 2370 | 2974 | high |
| ASV279 | 168   | 34  | 0.12 | 4.25  | 148 | 168  | 658  | 1002 | 1025 | low  |
| ASV421 | 168   | 50  | 0.18 | 3.95  | 149 | 168  | 374  | 1130 | 1135 | low  |
| ASV161 | 178.5 | 70  | 0.25 | 4.63  | 127 | 169  | 263  | 623  | 682  | low  |
| ASV48  | 247.5 | 94  | 0.33 | 6.96  | 202 | 202  | 248  | 315  | 318  | low  |
| ASV308 | 287   | 91  | 0.32 | 5.71  | 272 | 285  | 313  | 716  | 946  | low  |
| ASV281 | 299   | 50  | 0.18 | 8.34  | 176 | 179  | 276  | 453  | 465  | low  |
| ASV112 | 315   | 52  | 0.19 | 6.04  | 214 | 217  | 315  | 480  | 876  | low  |
| ASV259 | 394   | 69  | 0.25 | 4.26  | 253 | 387  | 504  | 668  | 915  | low  |
| ASV91  | 403   | 160 | 0.57 | 5.40  | 372 | 402  | 574  | 808  | 836  | low  |
| ASV368 | 405.5 | 43  | 0.15 | 8.47  | 387 | 398  | 467  | 647  | 665  | low  |
| ASV251 | 413.5 | 39  | 0.14 | 9.89  | 173 | 173  | 412  | 422  | 455  | low  |
| ASV325 | 450.5 | 81  | 0.29 | 6.73  | 369 | 371  | 462  | 730  | 772  | low  |
| ASV207 | 459.5 | 57  | 0.20 | 2.99  | 447 | 454  | 663  | 1100 | 1390 | low  |
| ASV172 | 462   | 58  | 0.21 | 8.46  | 355 | 406  | 463  | 594  | 598  | low  |
| ASV239 | 462   | 60  | 0.21 | 8.28  | 323 | 368  | 457  | 467  | 519  | low  |

|        |       |     |      |       |     |     |     |      |      |     |
|--------|-------|-----|------|-------|-----|-----|-----|------|------|-----|
| ASV98  | 463   | 83  | 0.30 | 9.30  | 444 | 450 | 463 | 525  | 589  | low |
| ASV1   | 464   | 281 | 1.00 | 7.27  | 451 | 459 | 465 | 655  | 690  | low |
| ASV15  | 464   | 154 | 0.55 | 12.15 | 463 | 464 | 467 | 690  | 696  | low |
| ASV191 | 464   | 41  | 0.15 | 8.45  | 331 | 378 | 463 | 595  | 602  | low |
| ASV7   | 464.5 | 256 | 0.91 | 5.17  | 462 | 465 | 510 | 1290 | 1300 | low |
| ASV99  | 464.5 | 136 | 0.48 | 8.76  | 394 | 451 | 465 | 498  | 595  | low |
| ASV26  | 467   | 182 | 0.65 | 5.08  | 432 | 462 | 534 | 598  | 826  | low |
| ASV80  | 467   | 80  | 0.28 | 12.07 | 432 | 432 | 465 | 647  | 677  | low |
| ASV152 | 471   | 82  | 0.29 | 5.35  | 173 | 176 | 463 | 618  | 629  | low |
| ASV122 | 471   | 32  | 0.11 | 7.35  | 440 | 457 | 467 | 628  | 680  | low |
| ASV338 | 492.5 | 36  | 0.13 | 3.87  | 394 | 410 | 496 | 823  | 864  | low |
| ASV322 | 503.5 | 97  | 0.35 | 4.52  | 464 | 467 | 721 | 1130 | 1135 | low |
| ASV127 | 507.5 | 80  | 0.28 | 9.74  | 365 | 447 | 504 | 626  | 636  | low |
| ASV293 | 541.5 | 37  | 0.13 | 4.97  | 465 | 518 | 564 | 730  | 790  | low |
| ASV107 | 545   | 102 | 0.36 | 6.88  | 432 | 462 | 542 | 698  | 713  | low |
| ASV287 | 560   | 17  | 0.06 | 4.18  | 331 | 354 | 558 | 688  | 690  | low |
| ASV434 | 561.5 | 18  | 0.06 | 6.22  | 355 | 406 | 464 | 573  | 688  | low |
| ASV355 | 565   | 56  | 0.20 | 3.13  | 168 | 169 | 565 | 1145 | 1280 | low |
| ASV201 | 568.5 | 63  | 0.22 | 4.24  | 217 | 378 | 519 | 721  | 729  | low |
| ASV272 | 568.5 | 35  | 0.12 | 8.93  | 403 | 416 | 549 | 571  | 574  | low |
| ASV132 | 571   | 135 | 0.48 | 5.53  | 190 | 194 | 461 | 577  | 581  | low |
| ASV356 | 578   | 41  | 0.15 | 9.59  | 401 | 406 | 558 | 598  | 608  | low |
| ASV46  | 584.5 | 189 | 0.67 | 6.42  | 398 | 402 | 519 | 589  | 601  | low |
| ASV260 | 588.5 | 52  | 0.19 | 3.36  | 305 | 409 | 590 | 906  | 983  | low |
| ASV406 | 588.5 | 36  | 0.13 | 5.28  | 462 | 519 | 555 | 628  | 637  | low |
| ASV30  | 591   | 230 | 0.82 | 4.15  | 462 | 465 | 591 | 1256 | 1295 | low |
| ASV358 | 593.5 | 100 | 0.36 | 5.21  | 434 | 458 | 559 | 728  | 733  | low |
| ASV273 | 616.5 | 41  | 0.15 | 5.02  | 168 | 168 | 607 | 743  | 956  | low |
| ASV234 | 629.5 | 59  | 0.21 | 5.71  | 335 | 362 | 621 | 682  | 686  | low |
| ASV86  | 654.5 | 87  | 0.31 | 6.35  | 414 | 420 | 655 | 690  | 772  | low |
| ASV87  | 668   | 174 | 0.62 | 4.82  | 464 | 465 | 583 | 730  | 875  | low |
| ASV82  | 669   | 94  | 0.33 | 5.62  | 335 | 406 | 673 | 776  | 957  | low |
| ASV20  | 677   | 172 | 0.61 | 7.68  | 418 | 432 | 569 | 696  | 705  | low |
| ASV213 | 677   | 83  | 0.30 | 4.32  | 385 | 402 | 677 | 690  | 721  | low |
| ASV290 | 681.5 | 27  | 0.10 | 5.10  | 168 | 169 | 676 | 781  | 783  | low |
| ASV246 | 687.5 | 93  | 0.33 | 8.30  | 413 | 426 | 618 | 760  | 773  | low |
| ASV382 | 687.5 | 26  | 0.09 | 4.55  | 319 | 319 | 585 | 703  | 825  | low |
| ASV311 | 689.5 | 64  | 0.23 | 7.27  | 402 | 467 | 688 | 706  | 742  | low |
| ASV9   | 696.5 | 231 | 0.82 | 5.13  | 456 | 466 | 690 | 772  | 780  | low |
| ASV14  | 696.5 | 236 | 0.84 | 3.77  | 353 | 389 | 505 | 1187 | 1280 | low |
| ASV115 | 715   | 41  | 0.15 | 4.57  | 399 | 612 | 715 | 946  | 958  | low |
| ASV150 | 721   | 86  | 0.31 | 4.05  | 462 | 465 | 725 | 806  | 1230 | low |
| ASV3   | 759   | 224 | 0.80 | 6.35  | 688 | 705 | 743 | 797  | 992  | low |
| ASV42  | 771.5 | 171 | 0.61 | 7.69  | 451 | 457 | 591 | 773  | 788  | low |
| ASV387 | 771.5 | 82  | 0.29 | 3.45  | 272 | 462 | 772 | 1230 | 1285 | low |
| ASV52  | 991.5 | 118 | 0.42 | 4.36  | 463 | 640 | 991 | 1285 | 1290 | low |
| ASV185 | 991.5 | 59  | 0.21 | 3.79  | 217 | 466 | 939 | 1025 | 1040 | low |

|       |      |     |      |      |     |     |     |      |      |     |
|-------|------|-----|------|------|-----|-----|-----|------|------|-----|
| ASV10 | 1195 | 119 | 0.42 | 4.04 | 689 | 742 | 896 | 1215 | 1225 | low |
|-------|------|-----|------|------|-----|-----|-----|------|------|-----|

**Table S4.** Amplicon sequence variants identified as having random forest models with R<sup>2</sup> values > 0 in gradient forest analysis.

| ASV    | R2   |
|--------|------|
| ASV20  | 0.57 |
| ASV12  | 0.55 |
| ASV353 | 0.50 |
| ASV203 | 0.43 |
| ASV15  | 0.42 |
| ASV146 | 0.40 |
| ASV354 | 0.37 |
| ASV39  | 0.36 |
| ASV4   | 0.35 |
| ASV373 | 0.34 |
| ASV80  | 0.34 |
| ASV297 | 0.34 |
| ASV310 | 0.33 |
| ASV42  | 0.33 |
| ASV22  | 0.32 |
| ASV323 | 0.32 |
| ASV287 | 0.31 |
| ASV140 | 0.31 |
| ASV26  | 0.30 |
| ASV6   | 0.30 |
| ASV437 | 0.29 |
| ASV213 | 0.28 |
| ASV85  | 0.28 |
| ASV75  | 0.28 |
| ASV110 | 0.27 |
| ASV402 | 0.27 |
| ASV97  | 0.27 |
| ASV208 | 0.26 |
| ASV1   | 0.26 |
| ASV127 | 0.26 |
| ASV374 | 0.26 |
| ASV201 | 0.25 |
| ASV371 | 0.25 |
| ASV9   | 0.25 |
| ASV7   | 0.25 |
| ASV11  | 0.25 |
| ASV301 | 0.25 |
| ASV113 | 0.24 |
| ASV161 | 0.24 |
| ASV418 | 0.24 |
| ASV49  | 0.24 |
| ASV293 | 0.24 |

|        |      |
|--------|------|
| ASV212 | 0.23 |
| ASV107 | 0.23 |
| ASV13  | 0.23 |
| ASV74  | 0.23 |
| ASV200 | 0.22 |
| ASV94  | 0.22 |
| ASV25  | 0.22 |
| ASV88  | 0.22 |
| ASV5   | 0.22 |
| ASV324 | 0.22 |
| ASV68  | 0.21 |
| ASV145 | 0.21 |
| ASV266 | 0.21 |
| ASV50  | 0.21 |
| ASV32  | 0.21 |
| ASV325 | 0.21 |
| ASV246 | 0.21 |
| ASV184 | 0.20 |
| ASV60  | 0.20 |
| ASV41  | 0.20 |
| ASV364 | 0.20 |
| ASV416 | 0.20 |
| ASV98  | 0.19 |
| ASV129 | 0.19 |
| ASV142 | 0.19 |
| ASV209 | 0.18 |
| ASV185 | 0.18 |
| ASV360 | 0.18 |
| ASV228 | 0.18 |
| ASV295 | 0.18 |
| ASV99  | 0.17 |
| ASV37  | 0.17 |
| ASV290 | 0.17 |
| ASV309 | 0.17 |
| ASV69  | 0.17 |
| ASV27  | 0.16 |
| ASV95  | 0.16 |
| ASV451 | 0.16 |
| ASV304 | 0.16 |
| ASV90  | 0.16 |
| ASV150 | 0.16 |
| ASV335 | 0.15 |
| ASV24  | 0.15 |
| ASV176 | 0.15 |
| ASV92  | 0.15 |
| ASV272 | 0.15 |
| ASV178 | 0.15 |
| ASV332 | 0.15 |

|        |      |
|--------|------|
| ASV87  | 0.14 |
| ASV191 | 0.14 |
| ASV172 | 0.14 |
| ASV316 | 0.14 |
| ASV219 | 0.14 |
| ASV162 | 0.14 |
| ASV368 | 0.14 |
| ASV311 | 0.14 |
| ASV165 | 0.14 |
| ASV248 | 0.14 |
| ASV302 | 0.14 |
| ASV314 | 0.14 |
| ASV151 | 0.14 |
| ASV197 | 0.13 |
| ASV174 | 0.13 |
| ASV23  | 0.13 |
| ASV124 | 0.13 |
| ASV58  | 0.13 |
| ASV72  | 0.13 |
| ASV53  | 0.13 |
| ASV183 | 0.13 |
| ASV194 | 0.13 |
| ASV78  | 0.13 |
| ASV86  | 0.12 |
| ASV30  | 0.12 |
| ASV247 | 0.12 |
| ASV168 | 0.12 |
| ASV328 | 0.12 |
| ASV351 | 0.12 |
| ASV291 | 0.12 |
| ASV149 | 0.12 |
| ASV83  | 0.12 |
| ASV89  | 0.12 |
| ASV237 | 0.12 |
| ASV51  | 0.11 |
| ASV265 | 0.11 |
| ASV463 | 0.11 |
| ASV33  | 0.11 |
| ASV128 | 0.11 |
| ASV133 | 0.11 |
| ASV71  | 0.11 |
| ASV365 | 0.11 |
| ASV340 | 0.11 |
| ASV442 | 0.11 |
| ASV277 | 0.11 |
| ASV376 | 0.10 |
| ASV91  | 0.10 |
| ASV408 | 0.10 |

|        |      |
|--------|------|
| ASV109 | 0.10 |
| ASV144 | 0.10 |
| ASV299 | 0.10 |
| ASV62  | 0.10 |
| ASV137 | 0.10 |
| ASV234 | 0.10 |
| ASV220 | 0.10 |
| ASV119 | 0.10 |
| ASV211 | 0.10 |
| ASV180 | 0.10 |
| ASV66  | 0.10 |
| ASV108 | 0.10 |
| ASV271 | 0.10 |
| ASV76  | 0.10 |
| ASV17  | 0.09 |
| ASV55  | 0.09 |
| ASV101 | 0.09 |
| ASV61  | 0.09 |
| ASV34  | 0.09 |
| ASV14  | 0.09 |
| ASV253 | 0.09 |
| ASV81  | 0.09 |
| ASV357 | 0.09 |
| ASV300 | 0.09 |
| ASV281 | 0.09 |
| ASV377 | 0.08 |
| ASV54  | 0.08 |
| ASV189 | 0.08 |
| ASV303 | 0.08 |
| ASV31  | 0.08 |
| ASV238 | 0.08 |
| ASV259 | 0.08 |
| ASV156 | 0.08 |
| ASV43  | 0.08 |
| ASV116 | 0.08 |
| ASV198 | 0.07 |
| ASV434 | 0.07 |
| ASV245 | 0.07 |
| ASV65  | 0.07 |
| ASV274 | 0.07 |
| ASV132 | 0.07 |
| ASV404 | 0.07 |
| ASV131 | 0.07 |
| ASV170 | 0.07 |
| ASV29  | 0.07 |
| ASV70  | 0.07 |
| ASV193 | 0.06 |
| ASV46  | 0.06 |

|        |      |
|--------|------|
| ASV225 | 0.06 |
| ASV285 | 0.06 |
| ASV152 | 0.06 |
| ASV391 | 0.06 |
| ASV398 | 0.06 |
| ASV18  | 0.06 |
| ASV153 | 0.06 |
| ASV121 | 0.06 |
| ASV282 | 0.06 |
| ASV341 | 0.06 |
| ASV139 | 0.06 |
| ASV284 | 0.06 |
| ASV298 | 0.06 |
| ASV250 | 0.06 |
| ASV322 | 0.06 |
| ASV349 | 0.06 |
| ASV154 | 0.05 |
| ASV28  | 0.05 |
| ASV361 | 0.05 |
| ASV370 | 0.05 |
| ASV222 | 0.05 |
| ASV317 | 0.05 |
| ASV215 | 0.05 |
| ASV96  | 0.05 |
| ASV73  | 0.05 |
| ASV401 | 0.05 |
| ASV268 | 0.05 |
| ASV230 | 0.05 |
| ASV294 | 0.05 |
| ASV407 | 0.04 |
| ASV362 | 0.04 |
| ASV321 | 0.04 |
| ASV235 | 0.04 |
| ASV2   | 0.04 |
| ASV67  | 0.04 |
| ASV138 | 0.04 |
| ASV397 | 0.04 |
| ASV338 | 0.04 |
| ASV432 | 0.04 |
| ASV336 | 0.03 |
| ASV343 | 0.03 |
| ASV231 | 0.03 |
| ASV141 | 0.03 |
| ASV177 | 0.03 |
| ASV167 | 0.03 |
| ASV262 | 0.03 |
| ASV485 | 0.03 |
| ASV35  | 0.03 |

|        |       |
|--------|-------|
| ASV125 | 0.03  |
| ASV379 | 0.03  |
| ASV175 | 0.03  |
| ASV395 | 0.02  |
| ASV190 | 0.02  |
| ASV19  | 0.02  |
| ASV367 | 0.02  |
| ASV334 | 0.02  |
| ASV405 | 0.02  |
| ASV93  | 0.02  |
| ASV440 | 0.02  |
| ASV206 | 0.02  |
| ASV148 | 0.02  |
| ASV204 | 0.02  |
| ASV40  | 0.02  |
| ASV240 | 0.02  |
| ASV166 | 0.02  |
| ASV412 | 0.02  |
| ASV378 | 0.02  |
| ASV242 | 0.02  |
| ASV358 | 0.02  |
| ASV112 | 0.02  |
| ASV429 | 0.01  |
| ASV136 | 0.01  |
| ASV387 | 0.01  |
| ASV21  | 0.01  |
| ASV164 | 0.01  |
| ASV239 | 0.01  |
| ASV296 | 0.01  |
| ASV267 | 0.01  |
| ASV102 | 0.01  |
| ASV44  | 0.01  |
| ASV330 | 0.01  |
| ASV171 | 0.01  |
| ASV350 | 0.01  |
| ASV218 | 0.01  |
| ASV252 | 0.00* |
| ASV117 | 0.00* |
| ASV115 | 0.00* |
| ASV64  | 0.00* |
| ASV352 | 0.00* |
| ASV337 | 0.00* |
| ASV275 | 0.00* |
| ASV169 | 0.00* |

---

\* Zero values are due to rounding.

| sequence_i<br>dentifier | sequence<br>_score | iden<br>tity | qua<br>lity | lca_tax_rdp                                                                                           | lca_tax_slv                                                                                        |
|-------------------------|--------------------|--------------|-------------|-------------------------------------------------------------------------------------------------------|----------------------------------------------------------------------------------------------------|
| ASV001                  | 0                  | 100          | 100         | Bacteria;"Proteobacteria";Alphaproteobacteria;Rhodobacterales;Rhodobacteraceae;                       | Bacteria;Proteobacteria;Alphaproteobacteria;Rhodobacterales;Rhodobacteraceae<br>;                  |
| ASV002                  | 0                  | 100          | 100         | Bacteria;Firmicutes;Bacilli;Bacillales;Bacillales_Incertae Sedis XII;Exiguobacterium;                 | Bacteria;Firmicutes;Bacilli;Exiguobacterales;Exiguobacteraceae;Exiguobacteriu<br>m;                |
| ASV003                  | 0                  | 100          | 100         | Bacteria;"Proteobacteria";Gammaproteobacteria;Pseudomonadales;Moraxellaceae;Acine<br>tobacter;        | Bacteria;Proteobacteria;Gammaproteobacteria;Pseudomonadales;Moraxellaceae<br>;Acinetobacter;       |
| ASV004                  | 0.994276           | 99.5<br>868  | 99          | Bacteria;"Proteobacteria";Alphaproteobacteria;Rhizobiales;unclassified_Rhizobiales;                   | Bacteria;Proteobacteria;Alphaproteobacteria;Rhizobiales;Rhizobiales Incertae<br>Sedis;uncultured;  |
| ASV005                  | 0.978057           | 91.7<br>355  | 97          | Bacteria;Cyanobacteria/Chloroplast;Chloroplast;Chloroplast;Bacillariophyta;                           | Bacteria;Cyanobacteria;Cyanobacteriia;Chloroplast;                                                 |
| ASV006                  | 0                  | 100          | 100         | Bacteria;"Proteobacteria";Alphaproteobacteria;Rhizobiales;unclassified_Rhizobiales;                   | Bacteria;Proteobacteria;Alphaproteobacteria;Rhizobiales;Rhizobiales Incertae<br>Sedis;uncultured;  |
| ASV007                  | 0.994294           | 98.7<br>603  | 99          | Bacteria;"Proteobacteria";Alphaproteobacteria;Rhizobiales;unclassified_Rhizobiales;                   | Bacteria;Proteobacteria;Alphaproteobacteria;Rhizobiales;Rhizobiales Incertae<br>Sedis;uncultured;  |
| ASV008                  | 0.994429           | 99.5<br>868  | 99          | Bacteria;"Proteobacteria";Alphaproteobacteria;Rhodobacterales;Rhodobacteraceae;                       | Bacteria;Proteobacteria;Alphaproteobacteria;Rhodobacterales;Rhodobacteraceae<br>;Rhodobacter;      |
| ASV009                  | 0                  | 100          | 100         | Bacteria;"Proteobacteria";Alphaproteobacteria;Rhodobacterales;Rhodobacteraceae;                       | Bacteria;Proteobacteria;Alphaproteobacteria;Rhodobacterales;Rhodobacteraceae<br>;Rhodobacter;      |
| ASV010                  | 0.994277           | 95.8<br>848  | 99          | Bacteria;"Proteobacteria";Gammaproteobacteria;Pseudomonadales;Moraxellaceae;                          | Bacteria;Proteobacteria;Gammaproteobacteria;Pseudomonadales;Moraxellaceae<br>;                     |
| ASV011                  | 0.994426           | 99.5<br>868  | 99          | Bacteria;"Proteobacteria";Alphaproteobacteria;Rhodobacterales;Rhodobacteraceae;                       | Bacteria;Proteobacteria;Alphaproteobacteria;Rhodobacterales;Rhodobacteraceae<br>;                  |
| ASV012                  | 0.977152           | 93.3<br>884  | 97          | Bacteria;Cyanobacteria/Chloroplast;Chloroplast;Chloroplast;Bacillariophyta;                           | Bacteria;Cyanobacteria;Cyanobacteriia;Chloroplast;                                                 |
| ASV013                  | 0                  | 100          | 100         | Bacteria;"Proteobacteria";Alphaproteobacteria;Sphingomonadales;Erythrobacteraceae;P<br>orphyrobacter; | Bacteria;Proteobacteria;Alphaproteobacteria;Sphingomonadales;Sphingomonad<br>aceae;Porphyrobacter; |
| ASV014                  | 0                  | 100          | 100         | Bacteria;"Proteobacteria";Alphaproteobacteria;Rhodobacterales;Rhodobacteraceae;                       | Bacteria;Proteobacteria;Alphaproteobacteria;Rhodobacterales;Rhodobacteraceae<br>;                  |
| ASV015                  | 0                  | 100          | 100         | Bacteria;"Proteobacteria";Alphaproteobacteria;Rhodobacterales;Rhodobacteraceae;                       | Bacteria;Proteobacteria;Alphaproteobacteria;Rhodobacterales;Rhodobacteraceae<br>;                  |
| ASV016                  | 0                  | 100          | 100         | Bacteria;Firmicutes;Bacilli;Bacillales;Bacillales_Incertae Sedis XII;Exiguobacterium;                 | Bacteria;Firmicutes;Bacilli;Exiguobacterales;Exiguobacteraceae;Exiguobacteriu<br>m;                |
| ASV017                  | 0.981446           | 95.4<br>545  | 98          | Bacteria;"Proteobacteria";Alphaproteobacteria;                                                        | Bacteria;Proteobacteria;Alphaproteobacteria;Rhizobiales;Rhizobiales Incertae<br>Sedis;uncultured;  |
| ASV018                  | 0                  | 100          | 100         | Bacteria;"Proteobacteria";Alphaproteobacteria;Sphingomonadales;Sphingomonadaceae;<br>Sphingorhabdus;  | Bacteria;Proteobacteria;Alphaproteobacteria;Sphingomonadales;Sphingomonad<br>aceae;Sphingorhabdus; |
| ASV019                  | 0                  | 100          | 100         | Bacteria;"Proteobacteria";Gammaproteobacteria;Xanthomonadales;Sinobacteraceae;Pov<br>alibacter;       | Bacteria;Proteobacteria;Gammaproteobacteria;Steroidobacterales;Steroidobacter<br>aceae;uncultured; |
| ASV020                  | 0.96929            | 97.5<br>309  | 96          | Bacteria;"Proteobacteria";Alphaproteobacteria;Rhodobacterales;Rhodobacteraceae;                       | Bacteria;Proteobacteria;Alphaproteobacteria;Rhodobacterales;Rhodobacteraceae<br>;Rhodobacter;      |

|        |          |             |     |                                                                                                                   |                                                                                              |
|--------|----------|-------------|-----|-------------------------------------------------------------------------------------------------------------------|----------------------------------------------------------------------------------------------|
| ASV021 | 0.988724 | 98.3<br>471 | 98  | Bacteria;Cyanobacteria/Chloroplast;Chloroplast;Chloroplast;Bacillariophyta;                                       | Bacteria;Cyanobacteria;Cyanobacteriia;Chloroplast;                                           |
| ASV022 | 0.994232 | 98.7<br>603 | 99  | Bacteria;"Proteobacteria";Alphaproteobacteria;Rhizobiales;Rhizobiales_incertae_sedis;Allobacter;                  | Bacteria;Proteobacteria;Alphaproteobacteria;Rhizobiales;                                     |
| ASV023 | 0.994369 | 99.5<br>868 | 99  | Bacteria;"Proteobacteria";Alphaproteobacteria;Rhizobiales;Rhodobiaceae;                                           | Bacteria;Proteobacteria;Alphaproteobacteria;Rhizobiales;Methylobacteriaceae;uncultured;      |
| ASV024 | 0        | 100         | 100 | Bacteria;"Proteobacteria";Alphaproteobacteria;Sphingomonadales;Erythrobacteraceae;Altererythrobacter;             | Bacteria;Proteobacteria;Alphaproteobacteria;Sphingomonadales;Sphingomonadaceae;              |
| ASV025 | 0.994375 | 99.5<br>868 | 99  | Bacteria;"Proteobacteria";Alphaproteobacteria;Rhodobacterales;Rhodobacteraceae;unclassified_Rhodobacteraceae;     | Bacteria;Proteobacteria;Alphaproteobacteria;Rhodobacterales;Rhodobacteraceae;                |
| ASV026 | 0.991336 | 99.5<br>868 | 99  | Bacteria;"Proteobacteria";Alphaproteobacteria;Rhizobiales;Hyphomicrobiaceae;Hyphomicrobium;                       | Bacteria;Proteobacteria;Alphaproteobacteria;Rhizobiales;Hyphomicrobiaceae;Hyphomicrobium;    |
| ASV027 | 0.994437 | 98.7<br>654 | 99  | Bacteria;"Proteobacteria";                                                                                        | Bacteria;Proteobacteria;Gammaproteobacteria;Burkholderiales;Comamonadaceae;                  |
| ASV028 | 0        | 100         | 100 | Bacteria;"Proteobacteria";Alphaproteobacteria;Rhizobiales;                                                        | Bacteria;Proteobacteria;Alphaproteobacteria;Rhizobiales;Beijerinckiaceae;                    |
| ASV029 | 0.994281 | 99.5<br>868 | 99  | Bacteria;Cyanobacteria/Chloroplast;Chloroplast;Chloroplast;Bacillariophyta;                                       | Bacteria;Cyanobacteria;Cyanobacteriia;Chloroplast;                                           |
| ASV030 | 0.994301 | 98.7<br>603 | 99  | Bacteria;"Actinobacteria";Actinobacteria;Actinobacteridae;Actinomycetales;Frankineae;Sporichthyaceae;Sporichthya; | Bacteria;Actinobacteriota;Actinobacteria;Frankiales;Sporichthyaceae;                         |
| ASV031 | 0        | 100         | 100 | Bacteria;"Proteobacteria";Gammaproteobacteria;Pseudomonadales;Moraxellaceae;Acinetobacter;                        | Bacteria;Proteobacteria;Gammaproteobacteria;Pseudomonadales;Moraxellaceae;Acinetobacter;     |
| ASV032 | 0        | 100         | 100 | Bacteria;"Proteobacteria";Alphaproteobacteria;Sphingomonadales;Sphingomonadaceae;Sphingomonas;                    | Bacteria;Proteobacteria;Alphaproteobacteria;Sphingomonadales;Sphingomonadaceae;Sphingomonas; |
| ASV033 | 0        | 100         | 100 | Bacteria;"Proteobacteria";Alphaproteobacteria;Rhizobiales;Bradyrhizobiaceae;Bradyrhizobium;                       | Bacteria;Proteobacteria;Alphaproteobacteria;Rhizobiales;Xanthobacteraceae;Bradyrhizobium;    |
| ASV034 | 0        | 100         | 100 | Bacteria;"Proteobacteria";Gammaproteobacteria;Xanthomonadales;Xanthomonadaceae;Thermomonas;                       | Bacteria;Proteobacteria;Gammaproteobacteria;Xanthomonadales;Xanthomonadaceae;Thermomonas;    |
| ASV035 | 0        | 100         | 100 | Bacteria;"Proteobacteria";Alphaproteobacteria;Rhizobiales;Hyphomicrobiaceae;Devosia;                              | Bacteria;Proteobacteria;Alphaproteobacteria;Rhizobiales;Devosiaceae;Devosia;                 |
| ASV036 | 0        | 100         | 100 | Bacteria;"Proteobacteria";Gammaproteobacteria;Pseudomonadales;Moraxellaceae;Acinetobacter;                        | Bacteria;Proteobacteria;Gammaproteobacteria;Pseudomonadales;Moraxellaceae;Acinetobacter;     |
| ASV037 | 0        | 100         | 100 | Bacteria;"Proteobacteria";Betaproteobacteria;Burkholderiales;                                                     | Bacteria;Proteobacteria;Gammaproteobacteria;Burkholderiales;Comamonadaceae;                  |
| ASV038 | 0.994349 | 99.5<br>868 | 99  | Bacteria;"Proteobacteria";Alphaproteobacteria;Rhizobiales;Xanthobacteraceae;                                      | Bacteria;Proteobacteria;Alphaproteobacteria;Rhizobiales;Xanthobacteraceae;                   |
| ASV039 | 0.994319 | 97.1<br>193 | 99  | Bacteria;"Proteobacteria";Alphaproteobacteria;Rhodobacterales;Rhodobacteraceae;                                   | Bacteria;Proteobacteria;Alphaproteobacteria;Rhodobacterales;Rhodobacteraceae;                |
| ASV040 | 0        | 100         | 100 | Bacteria;"Proteobacteria";Gammaproteobacteria;Xanthomonadales;Xanthomonadaceae;Lysobacter;                        | Bacteria;Proteobacteria;Gammaproteobacteria;Xanthomonadales;Xanthomonadaceae;Lysobacter;     |
| ASV041 | 0.994347 | 97.9<br>424 | 99  | Bacteria;"Proteobacteria";Alphaproteobacteria;Rhizobiales;                                                        | Bacteria;Proteobacteria;Alphaproteobacteria;Rhizobiales;Beijerinckiaceae;                    |
| ASV042 | 0        | 100         | 100 | Bacteria;"Proteobacteria";Alphaproteobacteria;Sphingomonadales;Sphingomonadaceae;                                 | Bacteria;Proteobacteria;Alphaproteobacteria;Sphingomonadales;Sphingomonadaceae;              |

|        |          |             |     |                                                                                                                                          |                                                                                                 |
|--------|----------|-------------|-----|------------------------------------------------------------------------------------------------------------------------------------------|-------------------------------------------------------------------------------------------------|
| ASV043 | 0.987799 | 95.0<br>413 | 98  | Bacteria;"Proteobacteria";Betaproteobacteria;Burkholderiales;unclassified_Burkholderiales;                                               | Bacteria;Proteobacteria;Gammaproteobacteria;Burkholderiales;Sutterellaceae;uncultured;          |
| ASV044 | 0        | 100         | 100 | Bacteria;"Proteobacteria";Alphaproteobacteria;Sphingomonadales;Sphingomonadaceae;Novosphingobium;                                        | Bacteria;Proteobacteria;Alphaproteobacteria;Sphingomonadales;Sphingomonadaceae;Novosphingobium; |
| ASV045 | 0.994221 | 99.1<br>736 | 99  | Bacteria;"Proteobacteria";Gammaproteobacteria;Xanthomonadales;Sinobacteraceae;Povolibacter;                                              | Bacteria;Proteobacteria;Gammaproteobacteria;Steroidobacteriales;Steroidobacteraceae;uncultured; |
| ASV046 | 0        | 100         | 100 | Bacteria;"Proteobacteria";Gammaproteobacteria;Xanthomonadales;Xanthomonadaceae;Arenimonas;                                               | Bacteria;Proteobacteria;Gammaproteobacteria;Xanthomonadales;Xanthomonadaceae;Arenimonas;        |
| ASV047 | 0.994432 | 99.5<br>868 | 99  | Bacteria;"Proteobacteria";Gammaproteobacteria;Pseudomonadales;Pseudomonadaceae;Rhizobacter;                                              | Bacteria;Proteobacteria;Gammaproteobacteria;Burkholderiales;Comamonadaceae;                     |
| ASV048 | 0        | 100         | 100 | Bacteria;"Proteobacteria";Gammaproteobacteria;Pseudomonadales;Moraxellaceae;Acinetobacter;                                               | Bacteria;Proteobacteria;Gammaproteobacteria;Pseudomonadales;Moraxellaceae;Acinetobacter;        |
| ASV049 | 0.835037 | 72.7<br>273 | 83  | Unclassified;                                                                                                                            | Bacteria; Proteobacteria; Alphaproteobacteria; Rickettsiales;                                   |
| ASV050 | 0.994371 | 99.5<br>868 | 99  | Bacteria;"Proteobacteria";Alphaproteobacteria;Rhizobiales;unclassified_Rhizobiales;                                                      | Bacteria;Proteobacteria;Alphaproteobacteria;Rhizobiales;Xanthobacteraceae;                      |
| ASV051 | 0        | 100         | 100 | Bacteria;"Proteobacteria";Alphaproteobacteria;Rhizobiales;Xanthobacteraceae;Xanthobacter;                                                | Bacteria;Proteobacteria;Alphaproteobacteria;Rhizobiales;Xanthobacteraceae;Xanthobacter;         |
| ASV052 | 0        | 100         | 100 | Bacteria;Cyanobacteria/Chloroplast;Chloroplast;Chloroplast;Bacillariophyta;                                                              | Bacteria;Cyanobacteria;Cyanobacteriia;Chloroplast;                                              |
| ASV053 | 0        | 100         | 100 | Bacteria;"Proteobacteria";Alphaproteobacteria;Sphingomonadales;Sphingomonadaceae;                                                        | Bacteria;Proteobacteria;Alphaproteobacteria;Sphingomonadales;Sphingomonadaceae;uncultured;      |
| ASV054 | 0        | 100         | 100 | Bacteria;"Actinobacteria";Actinobacteria;Actinobacteridae;Actinomycetales;Micrococccaceae;Micrococccaceae;Arthrobacter;                  | Bacteria;Actinobacteriota;Actinobacteria;Micrococcales;Micrococccaceae;                         |
| ASV055 | 0.994401 | 99.5<br>868 | 99  | Bacteria;"Proteobacteria";Alphaproteobacteria;Sphingomonadales;Erythrobacteraceae;                                                       | Bacteria;Proteobacteria;Alphaproteobacteria;Sphingomonadales;Sphingomonadaceae;                 |
| ASV056 | 0        | 100         | 100 | Bacteria;"Proteobacteria";Alphaproteobacteria;Sphingomonadales;Sphingomonadaceae;                                                        | Bacteria;Proteobacteria;Alphaproteobacteria;Sphingomonadales;Sphingomonadaceae;Sphingomonas;    |
| ASV057 | 0.994475 | 99.5<br>868 | 99  | Bacteria;"Bacteroidetes";Flavobacteriia;"Flavobacteriales";Flavobacteriaceae;Chryseobacterium;                                           | Bacteria;Bacteroidota;Bacteroidia;Flavobacteriales;Weeksellaceae;Chryseobacterium;              |
| ASV058 | 0.994415 | 99.5<br>868 | 99  | Bacteria;"Proteobacteria";Betaproteobacteria;Burkholderiales;Burkholderiales_incertae_sedis;                                             | Bacteria;Proteobacteria;Gammaproteobacteria;Burkholderiales;Comamonadaceae;                     |
| ASV059 | 0.994443 | 99.5<br>868 | 99  | Bacteria;Cyanobacteria/Chloroplast;Cyanobacteria;                                                                                        | Bacteria;Cyanobacteria;Cyanobacteriia;Cyanobacteriales;Phormidiaceae;Tychonema CCAP 1459-11B;   |
| ASV060 | 0.981966 | 98.7<br>603 | 98  | Bacteria;"Proteobacteria";Alphaproteobacteria;Rhodobacterales;Rhodobacteraceae;                                                          | Bacteria;Proteobacteria;Alphaproteobacteria;Rhodobacterales;Rhodobacteraceae;                   |
| ASV061 | 0        | 100         | 100 | Bacteria;"Proteobacteria";Betaproteobacteria;Burkholderiales;Burkholderiales_incertae_sedis;unclassified_Burkholderiales_incertae_sedis; | Bacteria;Proteobacteria;Gammaproteobacteria;Burkholderiales;Comamonadaceae;                     |
| ASV062 | 0        | 100         | 100 | Bacteria;"Proteobacteria";Alphaproteobacteria;Sphingomonadales;Sphingomonadaceae;Novosphingobium;                                        | Bacteria;Proteobacteria;Alphaproteobacteria;Sphingomonadales;Sphingomonadaceae;Novosphingobium; |
| ASV063 | 0.994379 | 98.7<br>603 | 99  | Bacteria;"Proteobacteria";Alphaproteobacteria;Caulobacteriales;Caulobacteraceae;Brevundimonas;                                           | Bacteria;Proteobacteria;Alphaproteobacteria;Caulobacteriales;Caulobacteraceae;Brevundimonas;    |
| ASV064 | 0        | 100         | 100 | Bacteria;Firmicutes;Bacilli;Bacillales;                                                                                                  | Bacteria;Firmicutes;Bacilli;Bacillales;                                                         |

|        |          |             |     |                                                                                                                  |                                                                                                     |
|--------|----------|-------------|-----|------------------------------------------------------------------------------------------------------------------|-----------------------------------------------------------------------------------------------------|
| ASV065 | 0        | 100         | 100 | Bacteria;"Proteobacteria";Alphaproteobacteria;Caulobacterales;Caulobacteraceae;Brevu<br>ndimonas;                | Bacteria;Proteobacteria;Alphaproteobacteria;Caulobacterales;Caulobacteraceae;<br>Brevundimonas;     |
| ASV066 | 0.994304 | 99.5<br>868 | 99  | Bacteria;"Proteobacteria";Alphaproteobacteria;Caulobacterales;Caulobacteraceae;Phenyl<br>obacterium;             | Bacteria;Proteobacteria;Alphaproteobacteria;Caulobacterales;Caulobacteraceae;<br>Phenylobacterium;  |
| ASV067 | 0        | 100         | 100 | Bacteria;"Proteobacteria";Betaproteobacteria;Burkholderiales;                                                    | Bacteria;Proteobacteria;Gammaproteobacteria;Burkholderiales;Comamonadace<br>ae;                     |
| ASV068 | 0.994561 | 98.3<br>539 | 99  | Bacteria;"Proteobacteria";Gammaproteobacteria;Xanthomonadales;Sinobacteraceae;Pov<br>alibacter;                  | Bacteria;Proteobacteria;Gammaproteobacteria;Steroidobacterales;Steroidobacter<br>aceae;uncultured;  |
| ASV069 | 0.994355 | 99.1<br>736 | 99  | Bacteria;"Proteobacteria";Alphaproteobacteria;Sphingomonadales;Sphingomonadaceae;                                | Bacteria;Proteobacteria;Alphaproteobacteria;Sphingomonadales;Sphingomonad<br>aceae;                 |
| ASV070 | 0.994413 | 99.1<br>77  | 99  | Bacteria;"Proteobacteria";Gammaproteobacteria;Xanthomonadales;Xanthomonadaceae;<br>Lysobacter;                   | Bacteria;Proteobacteria;Gammaproteobacteria;Xanthomonadales;Xanthomonad<br>aceae;Lysobacter;        |
| ASV071 | 0.990174 | 91.3<br>58  | 99  | Unclassified;                                                                                                    | Bacteria; Cyanobacteria; Oscillatoriothycideae; Chroococcales; Xenococcaceae;                       |
| ASV072 | 0        | 100         | 100 | Bacteria;"Actinobacteria";Actinobacteria;Actinobacteridae;Actinomycetales;Micrococcin<br>eae;Intrasporangiaceae; | Bacteria;Actinobacteriota;Actinobacteria;Micrococcales;Intrasporangiaceae;                          |
| ASV073 | 0.994226 | 98.3<br>471 | 99  | Bacteria;"Actinobacteria";Actinobacteria;Actinobacteridae;Actinomycetales;                                       | Bacteria;Actinobacteriota;Actinobacteria;PeM15;                                                     |
| ASV074 | 0.994362 | 98.3<br>471 | 99  | Bacteria;"Proteobacteria";Alphaproteobacteria;Sphingomonadales;Sphingomonadaceae;                                | Bacteria;Proteobacteria;Alphaproteobacteria;Sphingomonadales;Sphingomonad<br>aceae;                 |
| ASV075 | 0.994306 | 98.3<br>471 | 99  | Bacteria;"Proteobacteria";Alphaproteobacteria;Rhizobiales;Rhizobiales_incertae_sedis;A<br>lsobacter;             | Bacteria;Proteobacteria;Alphaproteobacteria;Rhizobiales;                                            |
| ASV076 | 0.994391 | 99.5<br>868 | 99  | Bacteria;"Proteobacteria";Alphaproteobacteria;Rhizobiales;                                                       | Bacteria;Proteobacteria;Alphaproteobacteria;Rhizobiales;Xanthobacteraceae;                          |
| ASV077 | 0        | 100         | 100 | Bacteria;"Proteobacteria";Gammaproteobacteria;Pseudomonadales;Pseudomonadaceae;<br>Pseudomonas;                  | Bacteria;Proteobacteria;Gammaproteobacteria;Pseudomonadales;Pseudomonad<br>aceae;Pseudomonas;       |
| ASV078 | 0.994432 | 99.5<br>868 | 99  | Bacteria;"Proteobacteria";Alphaproteobacteria;Rhodobacterales;Rhodobacteraceae;                                  | Bacteria;Proteobacteria;Alphaproteobacteria;Rhodobacterales;Rhodobacteraceae<br>;                   |
| ASV079 | 0        | 100         | 100 | Bacteria;Firmicutes;Bacilli;Bacillales;Bacillaceae 1;                                                            | Bacteria;Firmicutes;Bacilli;Bacillales;Bacillaceae;Bacillus;                                        |
| ASV080 | 0.981893 | 99.1<br>736 | 98  | Bacteria;"Proteobacteria";Alphaproteobacteria;Rhodobacterales;Rhodobacteraceae;                                  | Bacteria;Proteobacteria;Alphaproteobacteria;Rhodobacterales;Rhodobacteraceae<br>;                   |
| ASV081 | 0        | 100         | 100 | Bacteria;"Proteobacteria";Gammaproteobacteria;                                                                   | Bacteria;Proteobacteria;Gammaproteobacteria;Pseudomonadales;Haliaceae;O<br>M60(NOR5) clade;         |
| ASV082 | 0        | 100         | 100 | Bacteria;"Proteobacteria";Alphaproteobacteria;Sphingomonadales;Sphingomonadaceae;<br>Novosphingobium;            | Bacteria;Proteobacteria;Alphaproteobacteria;Sphingomonadales;Sphingomonad<br>aceae;Novosphingobium; |
| ASV083 | 0        | 100         | 100 | Bacteria;"Proteobacteria";Gammaproteobacteria;Xanthomonadales;Sinobacteraceae;Pov<br>alibacter;                  | Bacteria;Proteobacteria;Gammaproteobacteria;Steroidobacterales;Steroidobacter<br>aceae;uncultured;  |
| ASV084 | 0.98339  | 99.5<br>885 | 98  | Bacteria;Cyanobacteria/Chloroplast;Chloroplast;Chloroplast;Bacillariophyta;                                      | Bacteria;Cyanobacteria;Cyanobacteriia;Chloroplast;                                                  |
| ASV085 | 0        | 100         | 100 | Bacteria;"Actinobacteria";Actinobacteria;Actinobacteridae;Actinomycetales;                                       | Bacteria;Actinobacteriota;Actinobacteria;PeM15;                                                     |
| ASV086 | 0.994456 | 99.5<br>868 | 99  | Bacteria;"Actinobacteria";Actinobacteria;Actinobacteridae;Actinomycetales;Micrococcin<br>eae;Microbacteriaceae;  | Bacteria;Actinobacteriota;Actinobacteria;Micrococcales;Microbacteriaceae;                           |

|        |          |             |     |                                                                                                                                              |                                                                                                                          |
|--------|----------|-------------|-----|----------------------------------------------------------------------------------------------------------------------------------------------|--------------------------------------------------------------------------------------------------------------------------|
| ASV087 | 0.981885 | 96.6<br>942 | 98  | Bacteria;"Proteobacteria";Alphaproteobacteria;Rhizobiales;                                                                                   | Bacteria;Proteobacteria;Alphaproteobacteria;Rhizobiales;Rhizobiaceae;                                                    |
| ASV088 | 0.988007 | 99.1<br>736 | 98  | Bacteria;"Proteobacteria";Alphaproteobacteria;Sphingomonadales;Sphingomonadaceae;                                                            | Bacteria;Proteobacteria;Alphaproteobacteria;Sphingomonadales;Sphingomonadaceae;Sandaracinobacter;                        |
| ASV089 | 0.981363 | 96.6<br>942 | 98  | Bacteria;"Bacteroidetes";Sphingobacteriia;"Sphingobacteriales";Chitinophagaceae;                                                             | Bacteria;Bacteroidota;Bacteroidia;Chitinophagales;Chitinophagaceae;                                                      |
| ASV090 | 0        | 100         | 100 | Bacteria;"Proteobacteria";Betaproteobacteria;Burkholderiales;Comamonadaceae;                                                                 | Bacteria;Proteobacteria;Gammaproteobacteria;Burkholderiales;Comamonadaceae;Ramlibacter;                                  |
| ASV091 | 0.988063 | 95.8<br>678 | 98  | Bacteria;"Proteobacteria";Betaproteobacteria;                                                                                                | Bacteria;Proteobacteria;Gammaproteobacteria;Burkholderiales;                                                             |
| ASV092 | 0        | 100         | 100 | Bacteria;"Proteobacteria";Alphaproteobacteria;Rhizobiales;Rhodobiaceae;                                                                      | Bacteria;Proteobacteria;Alphaproteobacteria;Rhizobiales;Methylobacteriaceae;uncultured;                                  |
| ASV093 | 0.994379 | 99.1<br>736 | 99  | Bacteria;"Proteobacteria";Alphaproteobacteria;Sphingomonadales;Sphingomonadaceae;                                                            | Bacteria;Proteobacteria;Alphaproteobacteria;Sphingomonadales;Sphingomonadaceae;                                          |
| ASV094 | 0.988056 | 99.5<br>868 | 98  | Bacteria;"Proteobacteria";Alphaproteobacteria;Rhizobiales;Hyphomicrobiaceae;Hyphomicrobium;                                                  | Bacteria;Proteobacteria;Alphaproteobacteria;Rhizobiales;Hyphomicrobiaceae;Hyphomicrobium;                                |
| ASV095 | 0.989238 | 95.0<br>413 | 98  | Bacteria;"Proteobacteria";Alphaproteobacteria;Rhizobiales;unclassified_Rhizobiales;                                                          | Bacteria;Proteobacteria;Alphaproteobacteria;Rhizobiales;Rhizobiales Incertae Sedis;uncultured;                           |
| ASV096 | 0.9944   | 99.5<br>868 | 99  | Bacteria;"Proteobacteria";Alphaproteobacteria;Sphingomonadales;Sphingomonadaceae;                                                            | Bacteria;Proteobacteria;Alphaproteobacteria;Sphingomonadales;Sphingomonadaceae;                                          |
| ASV097 | 0        | 100         | 100 | Bacteria;"Actinobacteria";Actinobacteria;Actinobacteridae;Actinomycetales;Micrococcinaceae;Microbacteriaceae;unclassified_Microbacteriaceae; | Bacteria;Actinobacteriota;Actinobacteria;Micrococcales;Microbacteriaceae;Aurantimicrobium;                               |
| ASV098 | 0.994136 | 98.3<br>607 | 99  | Bacteria;"Verrucomicrobia";Verrucomicrobiae;Verrucomicrobiales;Verrucomicrobiaceae;Luteolibacter;                                            | Bacteria;Verrucomicrobiota;Verrucomicrobiae;Verrucomicrobiales;Rubritaleaceae;Luteolibacter;                             |
| ASV099 | 0.994153 | 98.7<br>654 | 99  | Bacteria;"Verrucomicrobia";Verrucomicrobiae;Verrucomicrobiales;Verrucomicrobiaceae;Luteolibacter;                                            | Bacteria;Verrucomicrobiota;Verrucomicrobiae;Verrucomicrobiales;Rubritaleaceae;Luteolibacter;                             |
| ASV100 | 0        | 100         | 100 | Bacteria;Firmicutes;Bacilli;Bacillales;Bacillaceae 1;Bacillus;                                                                               | Bacteria;Firmicutes;Bacilli;Bacillales;Bacillaceae;Bacillus;                                                             |
| ASV101 | 0.994235 | 97.5<br>207 | 99  | Bacteria;"Proteobacteria";Alphaproteobacteria;Rhizobiales;unclassified_Rhizobiales;                                                          | Bacteria;Proteobacteria;Alphaproteobacteria;Rhizobiales;                                                                 |
| ASV102 | 0.994406 | 98.3<br>539 | 99  | Bacteria;Firmicutes;Bacilli;Bacillales;Bacillales_Incertae Sedis XII;Exiguobacterium;                                                        | Bacteria;Firmicutes;Bacilli;Exiguobacteriales;Exiguobacteraceae;Exiguobacterium;                                         |
| ASV103 | 0.975895 | 98.7<br>603 | 97  | Bacteria;"Proteobacteria";Alphaproteobacteria;Rhizobiales;Brucellaceae;Brucella;                                                             | Bacteria;Proteobacteria;Alphaproteobacteria;Rhizobiales;Rhizobiaceae;                                                    |
| ASV104 | 0        | 100         | 100 | Bacteria;"Proteobacteria";Gammaproteobacteria;"Enterobacteriales";Enterobacteriaceae;                                                        | Bacteria;Proteobacteria;Gammaproteobacteria;Enterobacteriales;Enterobacteriaceae;                                        |
| ASV105 | 0        | 100         | 100 | Bacteria;"Proteobacteria";Alphaproteobacteria;Rhizobiales;Rhizobiaceae;Rhizobium;                                                            | Bacteria;Proteobacteria;Alphaproteobacteria;Rhizobiales;Rhizobiaceae;Allorhizobium-Neorhizobium-Pararhizobium-Rhizobium; |
| ASV106 | 0        | 100         | 100 | Bacteria;"Bacteroidetes";Sphingobacteriia;"Sphingobacteriales";Chitinophagaceae;                                                             | Bacteria;Bacteroidota;Bacteroidia;Chitinophagales;Chitinophagaceae;                                                      |
| ASV107 | 0        | 100         | 100 | Bacteria;"Proteobacteria";Gammaproteobacteria;Xanthomonadales;Xanthomonadaceae;Arenimonas;                                                   | Bacteria;Proteobacteria;Gammaproteobacteria;Xanthomonadales;Xanthomonadaceae;Arenimonas;                                 |
| ASV108 | 0.972711 | 92.9<br>752 | 97  | Bacteria;"Proteobacteria";Gammaproteobacteria;Xanthomonadales;Sinobacteraceae;Povolibacter;                                                  | Bacteria;Proteobacteria;Gammaproteobacteria;                                                                             |

|        |          |             |     |                                                                                                                  |                                                                                                               |
|--------|----------|-------------|-----|------------------------------------------------------------------------------------------------------------------|---------------------------------------------------------------------------------------------------------------|
| ASV109 | 0.987991 | 98.3<br>471 | 98  | Bacteria;"Proteobacteria";Alphaproteobacteria;Rhizobiales;Phyllobacteriaceae;                                    | Bacteria;Proteobacteria;Alphaproteobacteria;                                                                  |
| ASV110 | 0.98782  | 96.6<br>942 | 98  | Bacteria;"Proteobacteria";Gammaproteobacteria;Xanthomonadales;Xanthomonadaceae;                                  | Bacteria;Proteobacteria;Gammaproteobacteria;Xanthomonadales;Rhodanobacte<br>raceae;                           |
| ASV111 | 0.979283 | 97.5<br>207 | 97  | Bacteria;"Proteobacteria";Alphaproteobacteria;Sphingomonadales;                                                  | Bacteria;Proteobacteria;Alphaproteobacteria;Sphingomonadales;Sphingomonad<br>aceae;                           |
| ASV112 | 0        | 100         | 100 | Bacteria;"Proteobacteria";Gammaproteobacteria;Pseudomonadales;Moraxellaceae;Acine<br>tobacter;                   | Bacteria;Proteobacteria;Gammaproteobacteria;Pseudomonadales;Moraxellaceae<br>;Acinetobacter;                  |
| ASV113 | 0.99423  | 97.5<br>207 | 99  | Bacteria;"Proteobacteria";Betaproteobacteria;unclassified_Betaproteobacteria;                                    | Bacteria;Proteobacteria;Gammaproteobacteria;Burkholderiales;SC-I-84;                                          |
| ASV114 | 0.994394 | 99.5<br>868 | 99  | Bacteria;"Proteobacteria";Alphaproteobacteria;Sphingomonadales;Sphingomonadaceae;<br>Novosphingobium;            | Bacteria;Proteobacteria;Alphaproteobacteria;Sphingomonadales;Sphingomonad<br>aceae;Novosphingobium;           |
| ASV115 | 0        | 100         | 100 | Bacteria;"Proteobacteria";Alphaproteobacteria;Rhizobiales;Bradyrhizobiaceae;                                     | Bacteria;Proteobacteria;Alphaproteobacteria;Rhizobiales;Xanthobacteraceae;                                    |
| ASV116 | 0        | 100         | 100 | Bacteria;"Proteobacteria";Alphaproteobacteria;Rhizobiales;Methylobacteriaceae;Methyl<br>obacterium;              | Bacteria;Proteobacteria;Alphaproteobacteria;Rhizobiales;Beijerinckiaceae;Methyl<br>lobacterium-Methylorubrum; |
| ASV117 | 0        | 100         | 100 | Bacteria;"Proteobacteria";Alphaproteobacteria;Rhizobiales;Bradyrhizobiaceae;Bosea;                               | Bacteria;Proteobacteria;Alphaproteobacteria;Rhizobiales;Beijerinckiaceae;Bosea;                               |
| ASV118 | 0        | 100         | 100 | Bacteria;"Proteobacteria";Alphaproteobacteria;Caulobacterales;Caulobacteraceae;Brevu<br>ndimonas;                | Bacteria;Proteobacteria;Alphaproteobacteria;Caulobacterales;Caulobacteraceae;<br>Brevundimonas;               |
| ASV119 | 0.994162 | 97.1<br>311 | 99  | Bacteria;"Proteobacteria";Alphaproteobacteria;Rhodospirillales;Acetobacteraceae;Roseo<br>monas;                  | Bacteria;Proteobacteria;Alphaproteobacteria;Acetobacterales;Acetobacteraceae;<br>Roseomonas;                  |
| ASV120 | 0        | 100         | 100 | Bacteria;"Proteobacteria";Gammaproteobacteria;Xanthomonadales;Xanthomonadaceae;<br>Pseudoxanthomonas;            | Bacteria;Proteobacteria;Gammaproteobacteria;Xanthomonadales;Xanthomonad<br>aceae;Pseudoxanthomonas;           |
| ASV121 | 0.981367 | 95.4<br>545 | 98  | Bacteria;"Actinobacteria";Actinobacteria;Actinobacteridae;Actinomycetales;                                       | Bacteria;Actinobacteriota;Actinobacteria;                                                                     |
| ASV122 | 0        | 100         | 100 | Bacteria;"Actinobacteria";Actinobacteria;Actinobacteridae;Actinomycetales;Micrococcin<br>eae;Intrasporangiaceae; | Bacteria;Actinobacteriota;Actinobacteria;Micrococcales;Intrasporangiaceae;                                    |
| ASV123 | 0.991529 | 99.1<br>736 | 99  | Bacteria;Cyanobacteria;Chloroplast;Chloroplast;Chloroplast;Bacillariophyta;                                      | Bacteria;Cyanobacteria;Cyanobacteriia;Chloroplast;                                                            |
| ASV124 | 0.994373 | 98.3<br>471 | 99  | Bacteria;"Proteobacteria";Alphaproteobacteria;Rhizobiales;                                                       | Bacteria;Proteobacteria;Alphaproteobacteria;Rhizobiales;Beijerinckiaceae;                                     |
| ASV125 | 0        | 100         | 100 | Bacteria;"Proteobacteria";Alphaproteobacteria;Rhizobiales;Rhizobiaceae;                                          | Bacteria;Proteobacteria;Alphaproteobacteria;Rhizobiales;Rhizobiaceae;                                         |
| ASV126 | 0        | 100         | 100 | Bacteria;"Proteobacteria";Gammaproteobacteria;Pseudomonadales;Moraxellaceae;Acine<br>tobacter;                   | Bacteria;Proteobacteria;Gammaproteobacteria;Pseudomonadales;Moraxellaceae<br>;Acinetobacter;                  |
| ASV127 | 0.981891 | 97.9<br>424 | 98  | Bacteria;"Proteobacteria";Alphaproteobacteria;Rhodobacterales;Rhodobacteraceae;                                  | Bacteria;Proteobacteria;Alphaproteobacteria;Rhodobacterales;Rhodobacteraceae<br>;                             |
| ASV128 | 0.994293 | 96.6<br>942 | 99  | Bacteria;"Proteobacteria";Alphaproteobacteria;Rhodobacterales;Rhodobacteraceae;Rube<br>llimicrobium;             | Bacteria;Proteobacteria;Alphaproteobacteria;Rhodobacterales;Rhodobacteraceae<br>;Rubellimicrobium;            |
| ASV129 | 0.994223 | 98.3<br>471 | 99  | Bacteria;"Proteobacteria";Alphaproteobacteria;Rhizobiales;Rhizobiales_incertae_sedis;A<br>lsobacter;             | Bacteria;Proteobacteria;Alphaproteobacteria;Rhizobiales;                                                      |
| ASV130 | 0        | 100         | 100 | Bacteria;"Proteobacteria";Gammaproteobacteria;Pseudomonadales;Moraxellaceae;Acine<br>tobacter;                   | Bacteria;Proteobacteria;Gammaproteobacteria;Pseudomonadales;Moraxellaceae<br>;Acinetobacter;                  |
| ASV131 | 0.987738 | 95.0<br>413 | 98  | Bacteria;"Proteobacteria";Betaproteobacteria;                                                                    | Bacteria;Proteobacteria;Gammaproteobacteria;Burkholderiales;Sutterellaceae;un<br>cultured;                    |

|        |          |             |     |                                                                                                                |                                                                                                          |
|--------|----------|-------------|-----|----------------------------------------------------------------------------------------------------------------|----------------------------------------------------------------------------------------------------------|
| ASV132 | 0.994217 | 95.4<br>545 | 99  | Bacteria;"Bacteroidetes";Sphingobacteriia;"Sphingobacteriales";Chitinophagaceae;unclassified_Chitinophagaceae; | Bacteria;Bacteroidota;Bacteroidia;Chitinophagales;Chitinophagaceae;Dinghuibacter;                        |
| ASV133 | 0.994341 | 98.3<br>471 | 99  | Bacteria;"Proteobacteria";Alphaproteobacteria;Sphingomonadales;Erythrobacteraceae;                             | Bacteria;Proteobacteria;Alphaproteobacteria;Sphingomonadales;Sphingomonadaceae;Altererythrobacter;       |
| ASV134 | 0.994336 | 97.9<br>339 | 99  | Bacteria;"Proteobacteria";Alphaproteobacteria;Sphingomonadales;Sphingomonadaceae;Sphingorhabdus;               | Bacteria;Proteobacteria;Alphaproteobacteria;Sphingomonadales;Sphingomonadaceae;Sphingorhabdus;           |
| ASV135 | 0.99425  | 94.2<br>149 | 99  | Bacteria;Cyanobacteria/Chloroplast;Cyanobacteria;Family IV;GpIV;                                               | Bacteria;Cyanobacteria;Cyanobacteriia;SepB-3;                                                            |
| ASV136 | 0.985699 | 97.1<br>074 | 98  | Bacteria;Cyanobacteria/Chloroplast;Chloroplast;Chloroplast;Bacillariophyta;                                    | Bacteria;Cyanobacteria;Cyanobacteriia;Chloroplast;                                                       |
| ASV137 | 0.994343 | 99.5<br>868 | 99  | Bacteria;"Proteobacteria";Alphaproteobacteria;Rhodobacterales;Rhodobacteraceae;Amaricoccus;                    | Bacteria;Proteobacteria;Alphaproteobacteria;Rhodobacterales;Rhodobacteraceae;                            |
| ASV138 | 0.994439 | 99.5<br>868 | 99  | Bacteria;"Proteobacteria";Alphaproteobacteria;Sphingomonadales;Sphingomonadaceae;Novosphingobium;              | Bacteria;Proteobacteria;Alphaproteobacteria;Sphingomonadales;Sphingomonadaceae;Novosphingobium;          |
| ASV139 | 0.992071 | 99.5<br>868 | 99  | Bacteria;Cyanobacteria/Chloroplast;Chloroplast;Chloroplast;Bacillariophyta;                                    | Bacteria;Cyanobacteria;Cyanobacteriia;Chloroplast;                                                       |
| ASV140 | 0.994226 | 98.3<br>539 | 99  | Bacteria;"Proteobacteria";Betaproteobacteria;                                                                  | Bacteria;Proteobacteria;Gammaproteobacteria;Burkholderiales;SC-I-84;                                     |
| ASV141 | 0.99214  | 98.7<br>603 | 99  | Bacteria;"Proteobacteria";Deltaproteobacteria;Desulfobacterales;Desulfobulbaceae;                              | Bacteria;Desulfobacterota;Desulfobulbia;Desulfobulbales;Desulfocapsaceae;                                |
| ASV142 | 0        | 100         | 100 | Bacteria;"Proteobacteria";Alphaproteobacteria;Sphingomonadales;Sphingomonadaceae;Polymorphobacter;             | Bacteria;Proteobacteria;Alphaproteobacteria;Sphingomonadales;Sphingomonadaceae;Polymorphobacter;         |
| ASV143 | 0        | 100         | 100 | Bacteria;"Proteobacteria";Alphaproteobacteria;Sphingomonadales;Sphingomonadaceae;Novosphingobium;              | Bacteria;Proteobacteria;Alphaproteobacteria;Sphingomonadales;Sphingomonadaceae;Novosphingobium;          |
| ASV144 | 0        | 100         | 100 | Bacteria;"Proteobacteria";Alphaproteobacteria;Sphingomonadales;Sphingomonadaceae;Novosphingobium;              | Bacteria;Proteobacteria;Alphaproteobacteria;Sphingomonadales;Sphingomonadaceae;Novosphingobium;          |
| ASV145 | 0        | 100         | 100 | Bacteria;"Proteobacteria";Alphaproteobacteria;Rhizobiales;Bradyrhizobiaceae;Bosea;                             | Bacteria;Proteobacteria;Alphaproteobacteria;Rhizobiales;Beijerinckiaceae;Bosea;                          |
| ASV146 | 0.987966 | 96.6<br>942 | 98  | Bacteria;"Proteobacteria";Betaproteobacteria;                                                                  | Bacteria;Proteobacteria;Gammaproteobacteria;Burkholderiales;SC-I-84;                                     |
| ASV147 | 0.994317 | 99.1<br>736 | 99  | Bacteria;Cyanobacteria/Chloroplast;Chloroplast;Chloroplast;Bacillariophyta;                                    | Bacteria;Cyanobacteria;Cyanobacteriia;Chloroplast;                                                       |
| ASV148 | 0.994233 | 95.8<br>678 | 99  | Bacteria;"Bacteroidetes";Sphingobacteriia;"Sphingobacteriales";Chitinophagaceae;unclassified_Chitinophagaceae; | Bacteria;Bacteroidota;Bacteroidia;Chitinophagales;Chitinophagaceae;Dinghuibacter;                        |
| ASV149 | 0.9388   | 96.7<br>078 | 93  | Bacteria;"Proteobacteria";Alphaproteobacteria;Rhodobacterales;Rhodobacteraceae;                                | Bacteria;Proteobacteria;Alphaproteobacteria;Rhodobacterales;Rhodobacteraceae;                            |
| ASV150 | 0.994366 | 97.9<br>339 | 99  | Bacteria;"Proteobacteria";Alphaproteobacteria;Rhodobacterales;Rhodobacteraceae;                                | Bacteria;Proteobacteria;Alphaproteobacteria;Rhodobacterales;Rhodobacteraceae;                            |
| ASV151 | 0        | 100         | 100 | Bacteria;"Proteobacteria";Alphaproteobacteria;Rhizobiales;Methylobacteriaceae;Methylobacterium;                | Bacteria;Proteobacteria;Alphaproteobacteria;Rhizobiales;Beijerinckiaceae;Methylobacterium-Methylorubrum; |
| ASV152 | 0.976728 | 96.2<br>81  | 97  | Bacteria;"Proteobacteria";Betaproteobacteria;unclassified_Betaproteobacteria;                                  | Bacteria;Proteobacteria;Gammaproteobacteria;Burkholderiales;Sutterellaceae;AP99;                         |
| ASV153 | 0        | 100         | 100 | Bacteria;"Planctomycetes";Planctomycetia;Planctomycetales;Planctomycetaceae;unclassified_Planctomycetaceae;    | Bacteria;Planctomycetota;Planctomycetes;Pirellulales;Pirellulaceae;Pir4 lineage;                         |

|        |          |             |     |                                                                                                               |                                                                                                                          |
|--------|----------|-------------|-----|---------------------------------------------------------------------------------------------------------------|--------------------------------------------------------------------------------------------------------------------------|
| ASV154 | 0.977705 | 92.9<br>752 | 97  | Bacteria;Cyanobacteria/Chloroplast;Chloroplast;Chloroplast;Bacillariophyta;                                   | Bacteria;Cyanobacteria;Cyanobacteriia;Chloroplast;                                                                       |
| ASV155 | 0        | 100         | 100 | Bacteria;"Proteobacteria";Alphaproteobacteria;Rhizobiales;Xanthobacteraceae;Pseudolabrys;                     | Bacteria;Proteobacteria;Alphaproteobacteria;Rhizobiales;Xanthobacteraceae;                                               |
| ASV156 | 0        | 100         | 100 | Bacteria;"Proteobacteria";Alphaproteobacteria;Rhizobiales;Rhizobiaceae;Rhizobium;                             | Bacteria;Proteobacteria;Alphaproteobacteria;Rhizobiales;Rhizobiaceae;Allorhizobium-Neorhizobium-Pararhizobium-Rhizobium; |
| ASV157 | 0        | 100         | 100 | Bacteria;Firmicutes;Bacilli;Lactobacillales;Carnobacteriaceae;Trichococcus;                                   | Bacteria;Firmicutes;Bacilli;Lactobacillales;Carnobacteriaceae;Trichococcus;                                              |
| ASV158 | 0        | 100         | 100 | Bacteria;"Proteobacteria";Gammaproteobacteria;Xanthomonadales;Xanthomonadaceae;Stenotrophomonas;              | Bacteria;Proteobacteria;Gammaproteobacteria;Xanthomonadales;Xanthomonadaceae;Stenotrophomonas;                           |
| ASV159 | 0        | 100         | 100 | Bacteria;"Proteobacteria";Betaproteobacteria;Burkholderiales;Comamonadaceae;Delftia;                          | Bacteria;Proteobacteria;Gammaproteobacteria;Burkholderiales;Comamonadaceae;Delftia;                                      |
| ASV160 | 0.994383 | 99.1<br>736 | 99  | Bacteria;"Proteobacteria";Alphaproteobacteria;Sphingomonadales;Sphingomonadaceae;Sphingomonas;                | Bacteria;Proteobacteria;Alphaproteobacteria;Sphingomonadales;Sphingomonadaceae;Sphingomonas;                             |
| ASV161 | 0        | 100         | 100 | Bacteria;"Proteobacteria";Alphaproteobacteria;Caulobacterales;Caulobacteraceae;Phenyllobacterium;             | Bacteria;Proteobacteria;Alphaproteobacteria;Caulobacterales;Caulobacteraceae;Phenyllobacterium;                          |
| ASV162 | 0.991679 | 96.2<br>963 | 99  | Bacteria;"Proteobacteria";Alphaproteobacteria;Rhizobiales;                                                    | Bacteria;Proteobacteria;Alphaproteobacteria;Rhizobiales;Rhizobiales Incertae Sedis;Phreatobacter;                        |
| ASV164 | 0.99442  | 98.7<br>603 | 99  | Bacteria;"Bacteroidetes";Flavobacteriia;"Flavobacteriales";Flavobacteriaceae;Chryseobacterium;                | Bacteria;Bacteroidota;Bacteroidia;Flavobacteriales;Weeksellaceae;Chryseobacterium;                                       |
| ASV165 | 0        | 100         | 100 | Bacteria;"Proteobacteria";Alphaproteobacteria;Rhizobiales;Bradyrhizobiaceae;                                  | Bacteria;Proteobacteria;Alphaproteobacteria;Rhizobiales;Xanthobacteraceae;                                               |
| ASV166 | 0.994355 | 98.7<br>603 | 99  | Bacteria;"Proteobacteria";Alphaproteobacteria;Sphingomonadales;                                               | Bacteria;Proteobacteria;Alphaproteobacteria;Sphingomonadales;Sphingomonadaceae;                                          |
| ASV167 | 0        | 100         | 100 | Bacteria;"Proteobacteria";Alphaproteobacteria;Rhodobacterales;Rhodobacteraceae;Gemmobacter;                   | Bacteria;Proteobacteria;Alphaproteobacteria;Rhodobacterales;Rhodobacteraceae;                                            |
| ASV168 | 0        | 100         | 100 | Bacteria;"Proteobacteria";Alphaproteobacteria;Rhizobiales;Methylobacteriaceae;Microvirga;                     | Bacteria;Proteobacteria;Alphaproteobacteria;Rhizobiales;Beijerinckiaceae;Microvirga;                                     |
| ASV169 | 0        | 100         | 100 | Bacteria;"Proteobacteria";Alphaproteobacteria;Rhizobiales;Hyphomicrobiaceae;Devosia;                          | Bacteria;Proteobacteria;Alphaproteobacteria;Rhizobiales;Devosiaceae;Devosia;                                             |
| ASV170 | 0.991809 | 97.1<br>193 | 99  | Bacteria;"Actinobacteria";Actinobacteria;Rubrobacteridae;Solirubrobacterales;                                 | Bacteria;Actinobacteriota;Thermoleophilia;Solirubrobacterales;Solirubrobacteraceae;Conexibacter;                         |
| ASV171 | 0.994231 | 99.5<br>868 | 99  | Bacteria;"Proteobacteria";Gammaproteobacteria;Xanthomonadales;Sinobacteraceae;Povolibacter;                   | Bacteria;Proteobacteria;Gammaproteobacteria;Steroidobacterales;Steroidobacteraceae;uncultured;                           |
| ASV172 | 0.982317 | 98.3<br>471 | 98  | Bacteria;"Proteobacteria";Alphaproteobacteria;Rhodobacterales;Rhodobacteraceae;unclassified_Rhodobacteraceae; | Bacteria;Proteobacteria;Alphaproteobacteria;Rhodobacterales;Rhodobacteraceae;                                            |
| ASV173 | 0        | 100         | 100 | Bacteria;Firmicutes;Bacilli;Bacillales;Bacillales_Incertae Sedis XII;Exiguobacterium;                         | Bacteria;Firmicutes;Bacilli;Exiguobacterales;Exiguobacteraceae;Exiguobacterium;                                          |
| ASV174 | 0.987712 | 99.1<br>736 | 98  | Bacteria;"Proteobacteria";Gammaproteobacteria;Xanthomonadales;Xanthomonadaceae;Silanimonas;                   | Bacteria;Proteobacteria;Gammaproteobacteria;Xanthomonadales;Xanthomonadaceae;Silanimonas;                                |
| ASV175 | 0.994079 | 97.5<br>207 | 99  | Bacteria;"Planctomycetes";Planctomycetia;Planctomycetales;Planctomycetaceae;                                  | Bacteria;Planctomycetota;Planctomycetes;Gemmatales;Gemmataceae;Fimbrioglobus;                                            |
| ASV176 | 0.994122 | 98.3<br>539 | 99  | Bacteria;"Verrucomicrobia";Verrucomicrobiae;Verrucomicrobiales;Verrucomicrobiaceae;                           | Bacteria;Verrucomicrobiota;Verrucomicrobiae;Verrucomicrobiales;Rubritaleaceae;Luteolibacter;                             |
| ASV177 | 0        | 100         | 100 | Bacteria;"Proteobacteria";Alphaproteobacteria;Rhizobiales;"Aurantimonadaceae";Aureimonas;                     | Bacteria;Proteobacteria;Alphaproteobacteria;Rhizobiales;Rhizobiaceae;Aureimonas;                                         |

|        |          |             |     |                                                                                                                             |                                                                                                   |
|--------|----------|-------------|-----|-----------------------------------------------------------------------------------------------------------------------------|---------------------------------------------------------------------------------------------------|
| ASV178 | 0        | 100         | 100 | Bacteria;"Proteobacteria";Alphaproteobacteria;Rhizobiales;Methylocystaceae;Methylocystis;                                   | Bacteria;Proteobacteria;Alphaproteobacteria;Rhizobiales;Beijerinckiaceae;Methylocystis;           |
| ASV179 | 0.993926 | 98.3<br>539 | 99  | Bacteria;"Chloroflexi";unclassified_"Chloroflexi";                                                                          | Bacteria;Chloroflexi;KD4-96;                                                                      |
| ASV180 | 0.994361 | 99.5<br>868 | 99  | Bacteria;"Proteobacteria";Alphaproteobacteria;Sphingomonadales;Sphingomonadaceae;Sphingomonas;                              | Bacteria;Proteobacteria;Alphaproteobacteria;Sphingomonadales;Sphingomonadaceae;Sphingomonas;      |
| ASV181 | 0.978406 | 90.5<br>35  | 97  | Bacteria;"Gemmatimonadetes";Gemmatimonadetes;Gemmatimonadales;Gemmatimonadaceae;Gemmatimonas;                               | Bacteria;Gemmatimonadota;Gemmatimonadetes;Gemmatimonadales;Gemmatimonadaceae;Gemmatimonas;        |
| ASV182 | 0        | 100         | 100 | Bacteria;"Proteobacteria";Alphaproteobacteria;Sphingomonadales;Sphingomonadaceae;Sphingomonas;                              | Bacteria;Proteobacteria;Alphaproteobacteria;Sphingomonadales;Sphingomonadaceae;Sphingomonas;      |
| ASV183 | 0.994233 | 98.3<br>539 | 99  | Bacteria;"Bacteroidetes";Sphingobacteriia;"Sphingobacteriales";Chitinophagaceae;Flavisolibacter;                            | Bacteria;Bacteroidota;Bacteroidia;Chitinophagales;Chitinophagaceae;Flavisolibacter;               |
| ASV184 | 0.990843 | 92.9<br>752 | 99  | Bacteria;Cyanobacteria/Chloroplast;Cyanobacteria;Family IV;GpIV;                                                            | Bacteria;Cyanobacteria;Cyanobacteriia;SepB-3;                                                     |
| ASV185 | 0        | 100         | 100 | Bacteria;"Proteobacteria";Alphaproteobacteria;Rhodobacterales;Rhodobacteraceae;Paracoccus;                                  | Bacteria;Proteobacteria;Alphaproteobacteria;Rhodobacterales;Rhodobacteraceae;Paracoccus;          |
| ASV186 | 0.994255 | 99.5<br>868 | 99  | Bacteria;"Proteobacteria";Alphaproteobacteria;Sphingomonadales;Sphingomonadaceae;                                           | Bacteria;Proteobacteria;Alphaproteobacteria;Sphingomonadales;Sphingomonadaceae;Sandaracinobacter; |
| ASV187 | 0.994427 | 99.5<br>868 | 99  | Bacteria;"Proteobacteria";Betaproteobacteria;Burkholderiales;Alcaligenaceae;Azohydromonas;                                  | Bacteria;Proteobacteria;Gammaproteobacteria;Burkholderiales;Comamonadaceae;Azohydromonas;         |
| ASV188 | 0        | 100         | 100 | Bacteria;"Actinobacteria";Actinobacteria;Actinobacteridae;Actinomycetales;Propionibacterineae;Nocardiodaceae;Nocardioideis; | Bacteria;Actinobacteriota;Actinobacteria;Propionibacteriales;Nocardiodaceae;Nocardioideis;        |
| ASV189 | 0        | 100         | 100 | Bacteria;"Proteobacteria";Alphaproteobacteria;Sphingomonadales;Sphingomonadaceae;                                           | Bacteria;Proteobacteria;Alphaproteobacteria;Sphingomonadales;Sphingomonadaceae;                   |
| ASV190 | 0.991691 | 97.1<br>074 | 99  | Bacteria;"Proteobacteria";Betaproteobacteria;unclassified_Betaproteobacteria;                                               | Bacteria;Proteobacteria;Gammaproteobacteria;Burkholderiales;SC-I-84;                              |
| ASV191 | 0        | 100         | 100 | Bacteria;"Proteobacteria";Alphaproteobacteria;Rhodobacterales;Rhodobacteraceae;                                             | Bacteria;Proteobacteria;Alphaproteobacteria;Rhodobacterales;Rhodobacteraceae;                     |
| ASV192 | 0        | 100         | 100 | Bacteria;"Proteobacteria";Betaproteobacteria;Burkholderiales;Oxalobacteraceae;Massilia;                                     | Bacteria;Proteobacteria;Gammaproteobacteria;Burkholderiales;Oxalobacteraceae;Massilia;            |
| ASV193 | 0.994397 | 99.5<br>868 | 99  | Bacteria;"Proteobacteria";Betaproteobacteria;Rhodocyclales;Rhodocyclaceae;Dechloromonas;                                    | Bacteria;Proteobacteria;Gammaproteobacteria;Burkholderiales;Rhodocyclaceae;                       |
| ASV194 | 0.994332 | 97.9<br>339 | 99  | Bacteria;"Bacteroidetes";Sphingobacteriia;"Sphingobacteriales";Chitinophagaceae;Flaviumibacter;                             | Bacteria;Bacteroidota;Bacteroidia;Chitinophagales;Chitinophagaceae;Flaviumibacter;                |
| ASV196 | 0        | 100         | 100 | Bacteria;"Proteobacteria";Alphaproteobacteria;Sphingomonadales;Sphingomonadaceae;Sphingomonas;                              | Bacteria;Proteobacteria;Alphaproteobacteria;Sphingomonadales;Sphingomonadaceae;Sphingomonas;      |
| ASV197 | 0.97496  | 88.0<br>165 | 97  | Unclassified;                                                                                                               | Bacteria;Thermi;Deinococci;Deinococcales;Trueperaceae;                                            |
| ASV198 | 0.985964 | 91.3<br>223 | 98  | Bacteria;"Planctomycetes";Planctomycetia;Planctomycetales;Planctomycetaceae;unclassified_Planctomycetaceae;                 | Bacteria;Planctomycetota;Planctomycetes;Gemmatales;Gemmataceae;uncultured;                        |
| ASV199 | 0.994384 | 99.5<br>868 | 99  | Bacteria;"Proteobacteria";Alphaproteobacteria;Sphingomonadales;Sphingomonadaceae;Sphingomonas;                              | Bacteria;Proteobacteria;Alphaproteobacteria;Sphingomonadales;Sphingomonadaceae;Sphingomonas;      |

|        |          |             |     |                                                                                                |                                                                                                   |
|--------|----------|-------------|-----|------------------------------------------------------------------------------------------------|---------------------------------------------------------------------------------------------------|
| ASV200 | 0.956356 | 94.6<br>281 | 95  | Bacteria;"Proteobacteria";Alphaproteobacteria;Rhizobiales;unclassified_Rhizobiales;            | Bacteria;Proteobacteria;Alphaproteobacteria;Rhizobiales;Rhizobiales Incertae Sedis;Phreatobacter; |
| ASV201 | 0.989317 | 99.1<br>736 | 98  | Bacteria;"Proteobacteria";Alphaproteobacteria;                                                 | Bacteria;Proteobacteria;Alphaproteobacteria;Rhizobiales;Rhizobiales Incertae Sedis;uncultured;    |
| ASV202 | 0        | 100         | 100 | Bacteria;"Proteobacteria";Alphaproteobacteria;Sphingomonadales;Sphingomonadaceae;Sphingomonas; | Bacteria;Proteobacteria;Alphaproteobacteria;Sphingomonadales;Sphingomonadaceae;Sphingomonas;      |
| ASV203 | 0.991428 | 96.2<br>81  | 99  | Bacteria;"Planctomycetes";Planctomycetia;Planctomycetales;Planctomycetaceae;                   | Bacteria;Planctomycetota;Planctomycetes;Gemmatales;Gemmataceae;Fimbriiglobus;                     |
| ASV204 | 0        | 100         | 100 | Bacteria;"Proteobacteria";Gammaproteobacteria;Pseudomonadales;Moraxellaceae;Acinetobacter;     | Bacteria;Proteobacteria;Gammaproteobacteria;Pseudomonadales;Moraxellaceae;Acinetobacter;          |
| ASV205 | 0        | 100         | 100 | Bacteria;"Proteobacteria";Gammaproteobacteria;"Enterobacteriales";Enterobacteriaceae;Pantoea;  | Bacteria;Proteobacteria;Gammaproteobacteria;Enterobacteriales;Erwiniaceae;                        |
| ASV206 | 0.988113 | 97.1<br>074 | 98  | Bacteria;"Proteobacteria";Betaproteobacteria;                                                  | Bacteria;Proteobacteria;Gammaproteobacteria;Burkholderiales;SC-I-84;                              |
| ASV207 | 0.994419 | 99.1<br>736 | 99  | Bacteria;"Proteobacteria";Alphaproteobacteria;Caulobacteriales;Caulobacteraceae;Brevundimonas; | Bacteria;Proteobacteria;Alphaproteobacteria;Caulobacteriales;Caulobacteraceae;Brevundimonas;      |
| ASV208 | 0.994199 | 97.1<br>193 | 99  | Bacteria;"Proteobacteria";Betaproteobacteria;unclassified_Betaproteobacteria;                  | Bacteria;Proteobacteria;Gammaproteobacteria;Burkholderiales;SC-I-84;                              |
| ASV209 | 0.984075 | 96.2<br>81  | 98  | Bacteria;"Actinobacteria";                                                                     | Bacteria;Actinobacteriota;Thermoleophilia;Solirubrobacteriales;67-14;                             |
| ASV210 | 0.994269 | 97.5<br>207 | 99  | Bacteria;"Proteobacteria";Alphaproteobacteria;Rhizobiales;                                     | Bacteria;Proteobacteria;Alphaproteobacteria;Rhizobiales;Rhizobiales Incertae Sedis;Nordella;      |
| ASV211 | 0        | 100         | 100 | Bacteria;"Proteobacteria";Betaproteobacteria;Burkholderiales;Comamonadaceae;Polaromonas;       | Bacteria;Proteobacteria;Gammaproteobacteria;Burkholderiales;Comamonadaceae;Polaromonas;           |
| ASV212 | 0.97552  | 97.1<br>074 | 97  | Bacteria;"Proteobacteria";Alphaproteobacteria;Rhizobiales;Hyphomicrobiaceae;Hyphomicrobium;    | Bacteria;Proteobacteria;Alphaproteobacteria;Rhizobiales;Hyphomicrobiaceae;                        |
| ASV213 | 0.944197 | 94.6<br>281 | 94  | Bacteria;Firmicutes;Bacilli;Bacillales;                                                        | Bacteria;Firmicutes;Bacilli;Bacillales;Bacillaceae;Bacillus;                                      |
| ASV214 | 0.994268 | 96.2<br>81  | 99  | Bacteria;"Actinobacteria";Actinobacteria;Actinobacteridae;Actinomycetales;                     | Bacteria;Actinobacteriota;Actinobacteria;                                                         |
| ASV215 | 0.994369 | 98.7<br>603 | 99  | Bacteria;"Proteobacteria";Alphaproteobacteria;                                                 | Bacteria;Proteobacteria;Alphaproteobacteria;Rhizobiales;                                          |
| ASV216 | 0        | 100         | 100 | Bacteria;"Proteobacteria";Gammaproteobacteria;Pseudomonadales;Moraxellaceae;Acinetobacter;     | Bacteria;Proteobacteria;Gammaproteobacteria;Pseudomonadales;Moraxellaceae;Acinetobacter;          |
| ASV217 | 0.994349 | 99.5<br>868 | 99  | Bacteria;"Proteobacteria";Alphaproteobacteria;Sphingomonadales;Sphingomonadaceae;              | Bacteria;Proteobacteria;Alphaproteobacteria;Sphingomonadales;Sphingomonadaceae;Sphingomonas;      |
| ASV218 | 0        | 100         | 100 | Bacteria;Cyanobacteria;Chloroplast;Cyanobacteria;                                              | Bacteria;Cyanobacteria;Cyanobacteriia;Cyanobacteriales;Phormidiaceae;Tychonema CCAP 1459-11B;     |
| ASV219 | 0.985725 | 92.6<br>531 | 98  | Bacteria;"Actinobacteria";Actinobacteria;Acidimicrobiidae;Acidimicrobiales;"Acidimicrobinae";  | Bacteria;Actinobacteriota;Acidimicrobiia;Microtrichales;uncultured;                               |
| ASV220 | 0.947229 | 91.7<br>355 | 94  | Bacteria;"Proteobacteria";Alphaproteobacteria;Rhizobiales;                                     | Bacteria;Proteobacteria;Alphaproteobacteria;Rhizobiales;Beijerinckiaceae;Fukunishi;               |

|        |          |         |     |                                                                                                                                      |                                                                                                  |
|--------|----------|---------|-----|--------------------------------------------------------------------------------------------------------------------------------------|--------------------------------------------------------------------------------------------------|
| ASV221 | 0        | 100     | 100 | Bacteria;"Proteobacteria";Alphaproteobacteria;Rhodobacterales;Rhodobacteraceae;                                                      | Bacteria;Proteobacteria;Alphaproteobacteria;Rhodobacterales;Rhodobacteraceae;Paracoccus;         |
| ASV222 | 0        | 100     | 100 | Bacteria;"Actinobacteria";Actinobacteria;Actinobacteridae;Actinomycetales;Corynebacterineae;Mycobacteriaceae;Mycobacterium;          | Bacteria;Actinobacteriota;Actinobacteria;Corynebacteriales;Mycobacteriaceae;Mycobacterium;       |
| ASV223 | 0        | 100     | 100 | Bacteria;"Proteobacteria";Alphaproteobacteria;Caulobacterales;Caulobacteraceae;Brevundimonas;                                        | Bacteria;Proteobacteria;Alphaproteobacteria;Caulobacterales;Caulobacteraceae;Brevundimonas;      |
| ASV224 | 0        | 100     | 100 | Bacteria;"Proteobacteria";Betaproteobacteria;Burkholderiales;Comamonadaceae;Comamonas;                                               | Bacteria;Proteobacteria;Gammaproteobacteria;Burkholderiales;Comamonadaceae;Comamonas;            |
| ASV225 | 0.994148 | 99.5868 | 99  | Bacteria;"Proteobacteria";Alphaproteobacteria;Sphingomonadales;Sphingomonadaceae;Polymorphobacter;                                   | Bacteria;Proteobacteria;Alphaproteobacteria;Sphingomonadales;Sphingomonadaceae;Polymorphobacter; |
| ASV226 | 0.994272 | 99.1736 | 99  | Bacteria;"Proteobacteria";Alphaproteobacteria;Rhizobiales;Beijerinckiaceae;Camelimonas;                                              | Bacteria;Proteobacteria;Alphaproteobacteria;Rhizobiales;Beijerinckiaceae;Camelimonas;            |
| ASV227 | 0.938817 | 96.7078 | 93  | Bacteria;"Proteobacteria";Alphaproteobacteria;Rhodobacterales;Rhodobacteraceae;                                                      | Bacteria;Proteobacteria;Alphaproteobacteria;Rhodobacterales;Rhodobacteraceae;                    |
| ASV228 | 0.991155 | 98.3471 | 99  | Bacteria;"Proteobacteria";Alphaproteobacteria;Rhizobiales;unclassified_Rhizobiales;                                                  | Bacteria;Proteobacteria;Alphaproteobacteria;Rhizobiales;Rhizobiales Incertae Sedis;uncultured;   |
| ASV230 | 0        | 100     | 100 | Bacteria;"Proteobacteria";Alphaproteobacteria;Rhodobacterales;Rhodobacteraceae;Paracoccus;                                           | Bacteria;Proteobacteria;Alphaproteobacteria;Rhodobacterales;Rhodobacteraceae;Paracoccus;         |
| ASV231 | 0        | 100     | 100 | Bacteria;"Actinobacteria";Actinobacteria;Actinobacteridae;Actinomycetales;Micrococcinaceae;Microbacteriaceae;Curtobacterium;         | Bacteria;Actinobacteriota;Actinobacteria;Micrococcales;Microbacteriaceae;Curtobacterium;         |
| ASV232 | 0        | 100     | 100 | Bacteria;"Proteobacteria";Betaproteobacteria;Burkholderiales;Alcaligenaceae;Achromobacter;                                           | Bacteria;Proteobacteria;Gammaproteobacteria;Burkholderiales;Alcaligenaceae;                      |
| ASV233 | 0.987484 | 98.7603 | 98  | Bacteria;"Proteobacteria";Gammaproteobacteria;Xanthomonadales;Xanthomonadaceae;Silanimonas;                                          | Bacteria;Proteobacteria;Gammaproteobacteria;Xanthomonadales;Xanthomonadaceae;Silanimonas;        |
| ASV234 | 0.994349 | 98.3471 | 99  | Bacteria;"Proteobacteria";Gammaproteobacteria;Xanthomonadales;Xanthomonadaceae;Lysobacter;                                           | Bacteria;Proteobacteria;Gammaproteobacteria;Xanthomonadales;Xanthomonadaceae;Lysobacter;         |
| ASV235 | 0        | 100     | 100 | Bacteria;Firmicutes;Bacilli;Bacillales;Bacillaceae 1;Bacillus;                                                                       | Bacteria;Firmicutes;Bacilli;Bacillales;Bacillaceae;Bacillus;                                     |
| ASV236 | 0.994423 | 99.5868 | 99  | Bacteria;"Proteobacteria";Alphaproteobacteria;Sphingomonadales;Sphingomonadaceae;Novosphingobium;                                    | Bacteria;Proteobacteria;Alphaproteobacteria;Sphingomonadales;Sphingomonadaceae;Novosphingobium;  |
| ASV237 | 0.99444  | 99.5868 | 99  | Bacteria;"Proteobacteria";Betaproteobacteria;Burkholderiales;Comamonadaceae;                                                         | Bacteria;Proteobacteria;Gammaproteobacteria;Burkholderiales;Comamonadaceae;                      |
| ASV238 | 0.994257 | 96.2963 | 99  | Bacteria;"Proteobacteria";Alphaproteobacteria;Rhizobiales;                                                                           | Bacteria;Proteobacteria;Alphaproteobacteria;Rhizobiales;                                         |
| ASV239 | 0.994337 | 98.3471 | 99  | Bacteria;"Proteobacteria";Alphaproteobacteria;Sphingomonadales;Sphingomonadaceae;Sphingorhabdus;                                     | Bacteria;Proteobacteria;Alphaproteobacteria;Sphingomonadales;Sphingomonadaceae;Sphingorhabdus;   |
| ASV240 | 0        | 100     | 100 | Bacteria;"Actinobacteria";Actinobacteria;Actinobacteridae;Actinomycetales;Micrococcinaceae;Promicromonosporaceae;Cellulosimicrobium; | Bacteria;Actinobacteriota;Actinobacteria;Micrococcales;Promicromonosporaceae;Cellulosimicrobium; |
| ASV241 | 0.938774 | 96.7078 | 93  | Bacteria;"Proteobacteria";Alphaproteobacteria;Rhodobacterales;Rhodobacteraceae;                                                      | Bacteria;Proteobacteria;Alphaproteobacteria;Rhodobacterales;Rhodobacteraceae;                    |
| ASV242 | 0        | 100     | 100 | Bacteria;"Proteobacteria";Betaproteobacteria;Burkholderiales;Comamonadaceae;Pseudorhodofex;                                          | Bacteria;Proteobacteria;Gammaproteobacteria;Burkholderiales;Comamonadaceae;Pseudorhodofex;       |
| ASV243 | 0        | 100     | 100 | Bacteria;"Proteobacteria";Alphaproteobacteria;Rhizobiales;Methylobacteriaceae;Microvirga;                                            | Bacteria;Proteobacteria;Alphaproteobacteria;Rhizobiales;Beijerinckiaceae;Microvirga;             |

|        |          |             |     |                                                                                                                                 |                                                                                                                          |
|--------|----------|-------------|-----|---------------------------------------------------------------------------------------------------------------------------------|--------------------------------------------------------------------------------------------------------------------------|
| ASV244 | 0        | 100         | 100 | Bacteria;"Proteobacteria";Alphaproteobacteria;Rhizobiales;Rhizobiaceae;Rhizobium;                                               | Bacteria;Proteobacteria;Alphaproteobacteria;Rhizobiales;Rhizobiaceae;Allorhizobium-Neorhizobium-Pararhizobium-Rhizobium; |
| ASV245 | 0        | 100         | 100 | Bacteria;"Actinobacteria";Actinobacteria;Actinobacteridae;Actinomycetales;Propionibacterineae;Nocardiodaceae;Aeromicrobium;     | Bacteria;Actinobacteriota;Actinobacteria;Propionibacteriales;Nocardiodaceae;Aeromicrobium;                               |
| ASV246 | 0.994    | 98.3<br>607 | 99  | Bacteria;"Verrucomicrobia";Verrucomicrobiae;Verrucomicrobiales;Verrucomicrobiaceae;unclassified_Verrucomicrobiaceae;            | Bacteria;Verrucomicrobiota;Verrucomicrobiae;Verrucomicrobiales;Verrucomicrobiaceae;uncultured;                           |
| ASV247 | 0.994384 | 99.1<br>736 | 99  | Bacteria;"Proteobacteria";Alphaproteobacteria;Sphingomonadales;Sphingomonadaceae;Sphingomonas;                                  | Bacteria;Proteobacteria;Alphaproteobacteria;Sphingomonadales;Sphingomonadaceae;Sphingomonas;                             |
| ASV248 | 0.988223 | 98.3<br>471 | 98  | Bacteria;Cyanobacteria/Chloroplast;Chloroplast;Chloroplast;Bacillariophyta;                                                     | Bacteria;Cyanobacteria;Cyanobacteriia;Chloroplast;                                                                       |
| ASV249 | 0        | 100         | 100 | Bacteria;Cyanobacteria/Chloroplast;Chloroplast;Chloroplast;Streptophyta;                                                        | Bacteria;Cyanobacteria;Cyanobacteriia;Chloroplast;                                                                       |
| ASV250 | 0        | 100         | 100 | Bacteria;"Proteobacteria";Gammaproteobacteria;Xanthomonadales;Sinobacteraceae;                                                  | Bacteria;Proteobacteria;Gammaproteobacteria;Steroidobacterales;Steroidobacteraceae;uncultured;                           |
| ASV251 | 0.994281 | 96.6<br>942 | 99  | Bacteria;"Proteobacteria";Betaproteobacteria;Burkholderiales;Oxalobacteraceae;                                                  | Bacteria;Proteobacteria;Gammaproteobacteria;Burkholderiales;                                                             |
| ASV252 | 0.994389 | 99.1<br>736 | 99  | Bacteria;"Proteobacteria";Alphaproteobacteria;Sphingomonadales;Erythrobacteraceae;Altererythrobacter;                           | Bacteria;Proteobacteria;Alphaproteobacteria;Sphingomonadales;Sphingomonadaceae;                                          |
| ASV253 | 0.97986  | 96.6<br>942 | 97  | Bacteria;"Proteobacteria";Betaproteobacteria;unclassified_Betaproteobacteria;                                                   | Bacteria;Proteobacteria;Gammaproteobacteria;Burkholderiales;SC-I-84;                                                     |
| ASV254 | 0.983752 | 98.3<br>471 | 98  | Bacteria;"Proteobacteria";Alphaproteobacteria;Rhodobacterales;Rhodobacteraceae;                                                 | Bacteria;Proteobacteria;Alphaproteobacteria;Rhodobacterales;Rhodobacteraceae;                                            |
| ASV255 | 0.985064 | 95.8<br>678 | 98  | Bacteria;                                                                                                                       | Bacteria;Chloroflexi;KD4-96;                                                                                             |
| ASV256 | 0        | 100         | 100 | Bacteria;"Actinobacteria";Actinobacteria;Actinobacteridae;Actinomycetales;Propionibacterineae;Nocardiodaceae;Nocardioidea;      | Bacteria;Actinobacteriota;Actinobacteria;Propionibacteriales;Nocardiodaceae;Nocardioidea;                                |
| ASV257 | 0        | 100         | 100 | Bacteria;"Proteobacteria";Betaproteobacteria;Burkholderiales;Comamonadaceae;Hydrogenophaga;                                     | Bacteria;Proteobacteria;Gammaproteobacteria;Burkholderiales;Comamonadaceae;Hydrogenophaga;                               |
| ASV258 | 0.963499 | 97.9<br>339 | 96  | Bacteria;"Proteobacteria";Alphaproteobacteria;Rhizobiales;                                                                      | Bacteria;Proteobacteria;Alphaproteobacteria;Rhizobiales;                                                                 |
| ASV259 | 0.967794 | 96.2<br>81  | 96  | Bacteria;"Proteobacteria";Alphaproteobacteria;Rhizobiales;unclassified_Rhizobiales;                                             | Bacteria;Proteobacteria;Alphaproteobacteria;Rhizobiales;Rhizobiales Incertae Sedis;uncultured;                           |
| ASV260 | 0.994422 | 100         | 99  | Bacteria;Firmicutes;Bacilli;Bacillales;Bacillaceae 1;Bacillus;                                                                  | Bacteria;Firmicutes;Bacilli;Bacillales;Bacillaceae;Bacillus;                                                             |
| ASV261 | 0        | 100         | 100 | Bacteria;"Actinobacteria";Actinobacteria;Actinobacteridae;Actinomycetales;Propionibacterineae;Nocardiodaceae;Nocardioidea;      | Bacteria;Actinobacteriota;Actinobacteria;Propionibacteriales;Nocardiodaceae;Nocardioidea;                                |
| ASV262 | 0.994311 | 99.1<br>736 | 99  | Bacteria;"Bacteroidetes";Sphingobacteriia;"Sphingobacteriales";Chitinophagaceae;Terrimonas;                                     | Bacteria;Bacteroidota;Bacteroidia;Chitinophagales;Chitinophagaceae;Terrimonas;                                           |
| ASV263 | 0.981214 | 97.9<br>508 | 98  | Bacteria;"Actinobacteria";Actinobacteria;Acidimicrobiidae;Acidimicrobiales;"Acidimicrobiaceae";Acidimicrobiaceae;Ilumatobacter; | Bacteria;Actinobacteriota;Acidimicrobiia;Microtrichales;Ilumatobacteraceae;Ilumatobacter;                                |
| ASV264 | 0.987813 | 97.1<br>193 | 98  | Bacteria;"Proteobacteria";Alphaproteobacteria;Rhodobacterales;Rhodobacteraceae;Rubellimicrobium;                                | Bacteria;Proteobacteria;Alphaproteobacteria;Rhodobacterales;Rhodobacteraceae;Rubellimicrobium;                           |
| ASV265 | 0.994018 | 93.9<br>024 | 99  | Bacteria;"Proteobacteria";Gammaproteobacteria;                                                                                  | Bacteria;Proteobacteria;Gammaproteobacteria;PLTA13;                                                                      |

|        |          |             |     |                                                                                                                               |                                                                                                   |
|--------|----------|-------------|-----|-------------------------------------------------------------------------------------------------------------------------------|---------------------------------------------------------------------------------------------------|
| ASV266 | 0.991434 | 96.7<br>213 | 99  | Bacteria;"Verrucomicrobia";Verrucomicrobiae;Verrucomicrobiales;Verrucomicrobiaceae<br>;unclassified_Verrucomicrobiaceae;      | Bacteria;Verrucomicrobiota;Verrucomicrobiae;Verrucomicrobiales;Verrucomicrobiaceae;uncultured;    |
| ASV267 | 0        | 100         | 100 | Bacteria;"Planctomycetes";Planctomycetia;Planctomycetales;Planctomycetaceae;unclassified_Planctomycetaceae;                   | Bacteria;Planctomycetota;Planctomycetes;Pirellulales;Pirellulaceae;uncultured;                    |
| ASV268 | 0        | 100         | 100 | Bacteria;"Bacteroidetes";Sphingobacteriia;"Sphingobacteriales";Chitinophagaceae;Cnuella;                                      | Bacteria;Bacteroidota;Bacteroidia;Chitinophagales;Chitinophagaceae;Cnuella;                       |
| ASV269 | 0        | 100         | 100 | Bacteria;"Proteobacteria";Betaproteobacteria;Burkholderiales;Oxalobacteraceae;Massilia;                                       | Bacteria;Proteobacteria;Gammaproteobacteria;Burkholderiales;Oxalobacteraceae;Massilia;            |
| ASV270 | 0.958963 | 86.4<br>198 | 95  | Bacteria;"Planctomycetes";Planctomycetia;Planctomycetales;Planctomycetaceae;Pirellula;                                        | Bacteria;Planctomycetota;Planctomycetes;Pirellulales;Pirellulaceae;uncultured;                    |
| ASV271 | 0.972673 | 96.6<br>942 | 97  | Bacteria;"Proteobacteria";Alphaproteobacteria;Rhizobiales;Hyphomicrobiaceae;                                                  | Bacteria;Proteobacteria;Alphaproteobacteria;Rhizobiales;Hyphomicrobiaceae;Pedomicrobium;          |
| ASV272 | 0.991765 | 97.1<br>074 | 99  | Bacteria;"Proteobacteria";Alphaproteobacteria;Sphingomonadales;Sphingomonadaceae;                                             | Bacteria;Proteobacteria;Alphaproteobacteria;Sphingomonadales;Sphingomonadaceae;Sandaracinobacter; |
| ASV273 | 0.994436 | 97.9<br>424 | 99  | Bacteria;"Proteobacteria";Alphaproteobacteria;Rhizobiales;Xanthobacteraceae;                                                  | Bacteria;Proteobacteria;Alphaproteobacteria;Rhizobiales;Xanthobacteraceae;                        |
| ASV274 | 0        | 100         | 100 | Bacteria;"Proteobacteria";Alphaproteobacteria;Rhizobiales;Rhizobiaceae;                                                       | Bacteria;Proteobacteria;Alphaproteobacteria;Rhizobiales;Rhizobiaceae;                             |
| ASV275 | 0.987847 | 96.7<br>078 | 98  | Bacteria;"Actinobacteria";Actinobacteria;Rubrobacteridae;Gaiellales;Gaiellaceae;Gaiella;                                      | Bacteria;Actinobacteriota;Thermoleophilia;Gaiellales;Gaiellaceae;Gaiella;                         |
| ASV276 | 0.988109 | 99.5<br>868 | 98  | Bacteria;"Actinobacteria";Actinobacteria;Actinobacteridae;Actinomycetales;Propionibacterineae;Nocardiodaceae;                 | Bacteria;Actinobacteriota;Actinobacteria;Propionibacteriales;Nocardiodaceae;                      |
| ASV277 | 0.994329 | 99.5<br>868 | 99  | Bacteria;"Proteobacteria";Alphaproteobacteria;Sphingomonadales;Sphingomonadaceae;Sphingomonas;                                | Bacteria;Proteobacteria;Alphaproteobacteria;Sphingomonadales;Sphingomonadaceae;Sphingomonas;      |
| ASV278 | 0.981074 | 95.4<br>918 | 98  | Bacteria;"Actinobacteria";Actinobacteria;Acidimicrobidae;Acidimicrobiales;"Acidimicrobineae";Acidimicrobiaceae;Ilumatobacter; | Bacteria;Actinobacteriota;Acidimicrobiia;Microtrichales;Ilumatobacteraceae;CL500-29 marine group; |
| ASV279 | 0        | 100         | 100 | Bacteria;"Actinobacteria";Actinobacteria;Actinobacteridae;Actinomycetales;Micrococcinaceae;Intrasporangiaceae;                | Bacteria;Actinobacteriota;Actinobacteria;Micrococcales;Intrasporangiaceae;                        |
| ASV280 | 0        | 100         | 100 | Bacteria;"Actinobacteria";Actinobacteria;Acidimicrobidae;Acidimicrobiales;"Acidimicrobineae";Iamiaceae;Aquihabitans;          | Bacteria;Actinobacteriota;Acidimicrobiia;Microtrichales;Iamiaceae;Iamia;                          |
| ASV281 | 0.981819 | 98.7<br>603 | 98  | Bacteria;"Proteobacteria";Alphaproteobacteria;Sphingomonadales;Sphingomonadaceae;Sphingopyxis;                                | Bacteria;Proteobacteria;Alphaproteobacteria;Sphingomonadales;Sphingomonadaceae;Sphingopyxis;      |
| ASV282 | 0.994096 | 97.9<br>424 | 99  | Bacteria;"Verrucomicrobia";Verrucomicrobiae;Verrucomicrobiales;Verrucomicrobiaceae;                                           | Bacteria;Verrucomicrobiota;Verrucomicrobiae;Verrucomicrobiales;Rubritaleaceae;Luteolibacter;      |
| ASV283 | 0        | 100         | 100 | Bacteria;"Proteobacteria";Alphaproteobacteria;Rhizobiales;Xanthobacteraceae;                                                  | Bacteria;Proteobacteria;Alphaproteobacteria;Rhizobiales;Xanthobacteraceae;                        |
| ASV284 | 0.994304 | 99.1<br>736 | 99  | Bacteria;"Acidobacteria";Acidobacteria_Gp6;Gp6;                                                                               | Bacteria;Acidobacteriota;Vicinamibacteria;Vicinamibacteriales;Vicinamibacteraceae;Luteitalea;     |
| ASV285 | 0        | 100         | 100 | Bacteria;"Proteobacteria";Gammaproteobacteria;Pseudomonadales;Pseudomonadaceae;Pseudomonas;                                   | Bacteria;Proteobacteria;Gammaproteobacteria;Pseudomonadales;Pseudomonadaceae;Pseudomonas;         |
| ASV286 | 0        | 100         | 100 | Bacteria;"Bacteroidetes";Flavobacteriia;"Flavobacteriales";Flavobacteriaceae;Cloacibacterium;                                 | Bacteria;Bacteroidota;Bacteroidia;Flavobacteriales;Weeksellaceae;Cloacibacterium;                 |
| ASV287 | 0.986477 | 93.8<br>776 | 98  | Bacteria;"Verrucomicrobia";Verrucomicrobiae;Verrucomicrobiales;Verrucomicrobiaceae;Luteolibacter;                             | Bacteria;Verrucomicrobiota;Verrucomicrobiae;Verrucomicrobiales;Rubritaleaceae;Luteolibacter;      |

|        |          |         |     |                                                                                                                             |                                                                                                   |
|--------|----------|---------|-----|-----------------------------------------------------------------------------------------------------------------------------|---------------------------------------------------------------------------------------------------|
| ASV288 | 0.988206 | 99.1736 | 98  | Bacteria;"Proteobacteria";Betaproteobacteria;Burkholderiales;Oxalobacteraceae;                                              | Bacteria;Proteobacteria;Gammaproteobacteria;Burkholderiales;Oxalobacteraceae;                     |
| ASV289 | 0        | 100     | 100 | Bacteria;"Actinobacteria";Actinobacteria;Actinobacteridae;Actinomycetales;Corynebacterineae;Mycobacteriaceae;Mycobacterium; | Bacteria;Actinobacteriota;Actinobacteria;Corynebacteriales;Mycobacteriaceae;Mycobacterium;        |
| ASV290 | 0.994401 | 99.5868 | 99  | Bacteria;"Proteobacteria";Betaproteobacteria;Burkholderiales;Burkholderiaceae;Cupriavidus;                                  | Bacteria;Proteobacteria;Gammaproteobacteria;Burkholderiales;Burkholderiaceae;Cupriavidus;         |
| ASV291 | 0        | 100     | 100 | Bacteria;"Actinobacteria";Actinobacteria;Actinobacteridae;Actinomycetales;Propionibacterineae;Nocardiodaceae;               | Bacteria;Actinobacteriota;Actinobacteria;Propionibacteriales;Nocardiodaceae;Nocardioideae;        |
| ASV292 | 0        | 100     | 100 | Bacteria;"Actinobacteria";Actinobacteria;Actinobacteridae;Actinomycetales;Micrococccineae;Micrococcaceae;Arthrobacter;      | Bacteria;Actinobacteriota;Actinobacteria;Micrococcales;Micrococcaceae;Glutamicibacter;            |
| ASV293 | 0.994351 | 97.5207 | 99  | Bacteria;"Proteobacteria";Alphaproteobacteria;Rhizobiales;                                                                  | Bacteria;Proteobacteria;Alphaproteobacteria;Rhizobiales;                                          |
| ASV294 | 0.994413 | 98.3471 | 99  | Bacteria;"Proteobacteria";Alphaproteobacteria;Rhizobiales;Hyphomicrobiaceae;Hyphomicrobium;                                 | Bacteria;Proteobacteria;Alphaproteobacteria;Rhizobiales;Hyphomicrobiaceae;Hyphomicrobium;         |
| ASV295 | 0.975036 | 94.2149 | 97  | Bacteria;"Proteobacteria";Gammaproteobacteria;Xanthomonadales;Xanthomonadaceae;                                             | Bacteria;Proteobacteria;Gammaproteobacteria;Xanthomonadales;Rhodanobacteraceae;                   |
| ASV296 | 0        | 100     | 100 | Bacteria;Nitrospirae;"Nitrospira";"Nitrospirales";"Nitrospiraceae";Nitrospira;                                              | Bacteria;Nitrospirota;Nitrospira;Nitrospirales;Nitrospiraceae;Nitrospira;                         |
| ASV297 | 0.966885 | 96.6942 | 96  | Bacteria;"Proteobacteria";Alphaproteobacteria;Rhizobiales;Hyphomicrobiaceae;                                                | Bacteria;Proteobacteria;Alphaproteobacteria;Rhizobiales;Hyphomicrobiaceae;                        |
| ASV298 | 0.980426 | 95.4733 | 98  | Bacteria;"Actinobacteria";Actinobacteria;Rubrobacteridae;Gaiellales;Gaiellaceae;Gaiella;                                    | Bacteria;Actinobacteriota;Thermoleophilia;Gaiellales;                                             |
| ASV299 | 0.994378 | 98.3471 | 99  | Bacteria;"Proteobacteria";Alphaproteobacteria;Sphingomonadales;Sphingomonadaceae;Novosphingobium;                           | Bacteria;Proteobacteria;Alphaproteobacteria;Sphingomonadales;Sphingomonadaceae;Novosphingobium;   |
| ASV300 | 0.994027 | 93.3884 | 99  | Bacteria;Cyanobacteria/Chloroplast;Cyanobacteria;Family IV;GpIV;                                                            | Bacteria;Cyanobacteria;Cyanobacteriia;SepB-3;                                                     |
| ASV301 | 0        | 100     | 100 | Bacteria;"Proteobacteria";Alphaproteobacteria;Rhodospirillales;Acetobacteraceae;Roseomonas;                                 | Bacteria;Proteobacteria;Alphaproteobacteria;Acetobacterales;Acetobacteraceae;Roseomonas;          |
| ASV302 | 0.994371 | 98.7603 | 99  | Bacteria;"Actinobacteria";Actinobacteria;Actinobacteridae;Actinomycetales;Kineosporiineae;Kineosporiaceae;                  | Bacteria;Actinobacteriota;Actinobacteria;Kineosporiales;Kineosporiaceae;                          |
| ASV303 | 0.960513 | 93.4156 | 96  | Bacteria;"Proteobacteria";Alphaproteobacteria;Rhizobiales;unclassified_Rhizobiales;                                         | Bacteria;Proteobacteria;Alphaproteobacteria;Rhizobiales;Rhizobiales Incertae Sedis;Phreatobacter; |
| ASV304 | 0.94054  | 91.3223 | 94  | Bacteria;"Proteobacteria";Alphaproteobacteria;Caulobacterales;Hyphomonadaceae;unclassified_Hyphomonadaceae;                 | Bacteria;Proteobacteria;Alphaproteobacteria;Caulobacterales;Hyphomonadaceae;Hirschia;             |
| ASV305 | 0.940708 | 90.4959 | 94  | Bacteria;Cyanobacteria/Chloroplast;Cyanobacteria;unclassified_Cyanobacteria;                                                | Bacteria;Cyanobacteria;Cyanobacteriia;Cyanobacteriales;Coleofasciculaceae;                        |
| ASV306 | 0        | 100     | 100 | Bacteria;Firmicutes;Bacilli;Bacillales;Bacillaceae 1;Bacillus;                                                              | Bacteria;Firmicutes;Bacilli;Bacillales;Bacillaceae;Bacillus;                                      |
| ASV307 | 0.985962 | 91.7355 | 98  | Bacteria;"Planctomycetes";Planctomycetia;Planctomycetales;Planctomycetaceae;unclassified_Planctomycetaceae;                 | Bacteria;Planctomycetota;Planctomycetes;Gemmatales;Gemmataceae;uncultured;                        |
| ASV308 | 0        | 100     | 100 | Bacteria;"Proteobacteria";Alphaproteobacteria;Sphingomonadales;Sphingomonadaceae;Sphingomonas;                              | Bacteria;Proteobacteria;Alphaproteobacteria;Sphingomonadales;Sphingomonadaceae;Sphingomonas;      |
| ASV309 | 0        | 100     | 100 | Bacteria;"Planctomycetes";Planctomycetia;Planctomycetales;Planctomycetaceae;unclassified_Planctomycetaceae;                 | Bacteria;Planctomycetota;Planctomycetes;Gemmatales;Gemmataceae;uncultured;                        |

|        |          |             |     |                                                                                       |                                                                                              |
|--------|----------|-------------|-----|---------------------------------------------------------------------------------------|----------------------------------------------------------------------------------------------|
| ASV310 | 0.994242 | 97.1<br>193 | 99  | Bacteria;"Proteobacteria";Betaproteobacteria;                                         | Bacteria;Proteobacteria;Gammaproteobacteria;Burkholderiales;SC-I-84;                         |
| ASV311 | 0.994114 | 98.3<br>539 | 99  | Bacteria;"Verrucomicrobia";Verrucomicrobiae;Verrucomicrobiales;Verrucomicrobiaceae    | Bacteria;Verrucomicrobiota;Verrucomicrobiae;Verrucomicrobiales;Rubritaleaceae;Luteolibacter; |
| ASV312 | 0.990338 | 99.1<br>736 | 99  | Bacteria;"Proteobacteria";Alphaproteobacteria;Rhizobiales;                            | Bacteria;Proteobacteria;Alphaproteobacteria;Rhizobiales;Xanthobacteraceae;uncultured;        |
| ASV314 | 0        | 100         | 100 | Bacteria;"Actinobacteria";Actinobacteria;Actinobacteridae;Actinomycetales;Micrococcin | Bacteria;Actinobacteriota;Actinobacteria;Micrococcales;Intrasporangiaceae;                   |
| ASV315 | 0        | 100         | 100 | ae;Intrasporangiaceae;                                                                | Bacteria;Proteobacteria;Alphaproteobacteria;Caulobacterales;Caulobacteraceae;Brevu           |
| ASV316 | 0        | 100         | 100 | Bacteria;"Proteobacteria";Alphaproteobacteria;Caulobacterales;Caulobacteraceae;Brevu  | Bacteria;Proteobacteria;Alphaproteobacteria;Azospirillales;Azospirillaceae;Sker              |
| ASV317 | 0        | 100         | 100 | ndimonas;                                                                             | manella;                                                                                     |
| ASV318 | 0.98742  | 93.4<br>694 | 98  | Bacteria;"Proteobacteria";Alphaproteobacteria;Rhodospirillales;Rhodospirillaceae;Sker | Bacteria;Proteobacteria;Alphaproteobacteria;Sphingomonadales;Sphingomonad                    |
| ASV319 | 0.994325 | 98.3<br>471 | 99  | manella;                                                                              | aceae;Novosphingobium;                                                                       |
| ASV320 | 0.991396 | 97.1<br>193 | 99  | Bacteria;"Proteobacteria";Alphaproteobacteria;Sphingomonadales;Sphingomonadaceae;     | Bacteria;Actinobacteriota;Acidimicrobiia;Microtrichales;Microtrichaceae;IMCC2                |
| ASV321 | 0.994346 | 99.1<br>736 | 99  | Novosphingobium;                                                                      | 6207;                                                                                        |
| ASV322 | 0.991321 | 94.2<br>857 | 99  | Bacteria;"Actinobacteria";Actinobacteria;Acidimicrobidae;Acidimicrobiales;"Acidimicro | Bacteria;Proteobacteria;Alphaproteobacteria;Sphingomonadales;Sphingomonad                    |
| ASV323 | 0.98774  | 96.6<br>942 | 98  | bineae";Iamiaceae;Aquihabitans;                                                       | aceae;Sphingomonas;                                                                          |
| ASV324 | 0.994418 | 99.1<br>736 | 99  | Bacteria;"Proteobacteria";Alphaproteobacteria;Sphingomonadales;Sphingomonadaceae;     | Bacteria;Chloroflexi;KD4-96;                                                                 |
| ASV325 | 0.994144 | 97.5<br>207 | 99  | Sphingomonas;                                                                         | Bacteria;Proteobacteria;Alphaproteobacteria;Sphingomonadales;Sphingomonad                    |
| ASV326 | 0.98831  | 97.1<br>074 | 98  | Bacteria;"Actinobacteria";Actinobacteria;Acidimicrobidae;Acidimicrobiales;"Acidimicro | aceae;Sphingomonas;                                                                          |
| ASV327 | 0.994434 | 98.7<br>654 | 99  | bineae";Acidimicrobiaceae;Ilumatobacter;                                              | Bacteria;Actinobacteriota;Acidimicrobiia;Microtrichales;Ilumatobacteraceae;CL                |
| ASV328 | 0.994413 | 99.5<br>868 | 99  | Bacteria;"Proteobacteria";Betaproteobacteria;                                         | 500-29 marine group;                                                                         |
| ASV330 | 0.965264 | 88.8<br>43  | 96  | Bacteria;"Proteobacteria";Alphaproteobacteria;Rhizobiales;                            | Bacteria;Proteobacteria;Gammaproteobacteria;Burkholderiales;                                 |
| ASV331 | 0.993865 | 98.7<br>705 | 99  | Bacteria;"Proteobacteria";Alphaproteobacteria;Rhizobiales;                            | Bacteria;Proteobacteria;Alphaproteobacteria;Rhizobiales;Beijerinckiaceae;                    |
| ASV332 | 0.994165 | 95.0<br>617 | 99  | Bacteria;"Planctomycetes";Planctomycetia;Planctomycetales;Planctomycetaceae;          | Bacteria;Planctomycetota;Planctomycetes;Pirellulales;Pirellulaceae;Pirellula;                |
|        |          |             |     | Bacteria;"Bacteroidetes";Sphingobacteriia;"Sphingobacteriales";Chitinophagaceae;      | Bacteria;Bacteroidota;Bacteroidia;Chitinophagales;Chitinophagaceae;unculture                 |
|        |          |             |     | Bacteria;"Proteobacteria";Betaproteobacteria;Burkholderiales;                         | d;                                                                                           |
|        |          |             |     | Bacteria;"Proteobacteria";Alphaproteobacteria;Caulobacterales;Caulobacteraceae;Phenyl | Bacteria;Proteobacteria;Gammaproteobacteria;Burkholderiales;Comamonadace                     |
|        |          |             |     | obacterium;                                                                           | ae;                                                                                          |
|        |          |             |     | Unclassified;                                                                         | Bacteria;Proteobacteria;Alphaproteobacteria;Caulobacterales;Caulobacteraceae;                |
|        |          |             |     | Bacteria;"Planctomycetes";Planctomycetia;Planctomycetales;Planctomycetaceae;Aquisp    | Phenyllobacterium;                                                                           |
|        |          |             |     | haera;                                                                                | Bacteria; Proteobacteria;                                                                    |
|        |          |             |     | Bacteria;"Actinobacteria";Actinobacteria;Acidimicrobidae;Acidimicrobiales;"Acidimicro | Bacteria;Planctomycetota;Planctomycetes;Isosphaerales;Isosphaeraceae;uncultu                 |
|        |          |             |     | bineae";                                                                              | red;                                                                                         |
|        |          |             |     |                                                                                       | Bacteria;Actinobacteriota;Acidimicrobiia;Microtrichales;uncultured;                          |

|        |          |         |     |                                                                                                                                     |                                                                                                        |
|--------|----------|---------|-----|-------------------------------------------------------------------------------------------------------------------------------------|--------------------------------------------------------------------------------------------------------|
| ASV333 | 0.99485  | 98.7603 | 99  | Bacteria;"Proteobacteria";Gammaproteobacteria;Xanthomonadales;Sinobacteraceae;Pov<br>alibacter;                                     | Bacteria;Proteobacteria;Gammaproteobacteria;Steroidobacterales;Steroidobacter<br>aceae;uncultured;     |
| ASV334 | 0.994469 | 99.5868 | 99  | Bacteria;"Proteobacteria";Alphaproteobacteria;Rhizobiales;                                                                          | Bacteria;Proteobacteria;Alphaproteobacteria;Rhizobiales;Rhizobiaceae;                                  |
| ASV335 | 0        | 100     | 100 | Bacteria;"Proteobacteria";Alphaproteobacteria;Rhizobiales;Methylocystaceae;Methylocy<br>stis;                                       | Bacteria;Proteobacteria;Alphaproteobacteria;Rhizobiales;Beijerinckiacaceae;Methy<br>locystis;          |
| ASV336 | 0.980468 | 92.1811 | 98  | Bacteria;"Proteobacteria";Alphaproteobacteria;unclassified_Alphaproteobacteria;                                                     | Bacteria;Proteobacteria;Alphaproteobacteria;Tistrellales;Geminicoccaceae;Candi<br>datus Alysiosphaera; |
| ASV337 | 0.990094 | 96.6942 | 99  | Bacteria;Cyanobacteria/Chloroplast;Cyanobacteria;Family VIII;GpVIII;                                                                | Bacteria;Cyanobacteria;Cyanobacteriia;Cyanobacteriales;Xenococcaceae;Pleuroc<br>apsa PCC-7319;         |
| ASV338 | 0        | 100     | 100 | Bacteria;"Proteobacteria";Alphaproteobacteria;Caulobacterales;Caulobacteraceae;Brevu<br>ndimonas;                                   | Bacteria;Proteobacteria;Alphaproteobacteria;Caulobacterales;Caulobacteraceae;<br>Brevundimonas;        |
| ASV339 | 0.945606 | 91.7355 | 94  | Bacteria;"Proteobacteria";Alphaproteobacteria;Caulobacterales;Hyphomonadaceae;                                                      | Bacteria;Proteobacteria;Alphaproteobacteria;Caulobacterales;Hyphomonadacea<br>e;Hirschia;              |
| ASV340 | 0.982025 | 98.3471 | 98  | Bacteria;"Proteobacteria";Alphaproteobacteria;Rhodobacterales;Rhodobacteraceae;                                                     | Bacteria;Proteobacteria;Alphaproteobacteria;Rhodobacterales;Rhodobacteraceae<br>;                      |
| ASV341 | 0.98011  | 93.8272 | 98  | Bacteria;"Proteobacteria";Gammaproteobacteria;                                                                                      | Bacteria;Proteobacteria;Gammaproteobacteria;                                                           |
| ASV342 | 0        | 100     | 100 | Bacteria;"Proteobacteria";Betaproteobacteria;Burkholderiales;Oxalobacteraceae;Massilia;                                             | Bacteria;Proteobacteria;Gammaproteobacteria;Burkholderiales;Oxalobacteracea<br>e;Massilia;             |
| ASV343 | 0.99441  | 99.5868 | 99  | Bacteria;"Actinobacteria";Actinobacteria;Actinobacteridae;Actinomycetales;Propionibac<br>terineae;Nocardiodaceae;Nocardioides;      | Bacteria;Actinobacteriota;Actinobacteria;Propionibacteriales;Nocardiodaceae;N<br>ocardioides;          |
| ASV344 | 0        | 100     | 100 | Bacteria;"Proteobacteria";Gammaproteobacteria;"Enterobacteriales";Enterobacteriaceae;<br>Plesiomonas;                               | Bacteria;Proteobacteria;Gammaproteobacteria;Enterobacterales;Enterobacteriac<br>eae;Plesiomonas;       |
| ASV345 | 0        | 100     | 100 | Bacteria;"Proteobacteria";Alphaproteobacteria;Sphingomonadales;Sphingomonadaceae;<br>Sphingomonas;                                  | Bacteria;Proteobacteria;Alphaproteobacteria;Sphingomonadales;Sphingomonad<br>aceae;Sphingomonas;       |
| ASV346 | 0        | 100     | 100 | Bacteria;"Actinobacteria";Actinobacteria;Actinobacteridae;Actinomycetales;Corynebacte<br>rineae;Mycobacteriaceae;Mycobacterium;     | Bacteria;Actinobacteriota;Actinobacteria;Corynebacteriales;Mycobacteriaceae;M<br>ycobacterium;         |
| ASV347 | 0.975099 | 87.2428 | 97  | Unclassified;                                                                                                                       | Bacteria; Bacteroidetes; Cytophagia; Cytophagales; Cytophagaceae; Rudanella;                           |
| ASV348 | 0.983379 | 95.8678 | 98  | Bacteria;"Proteobacteria";Betaproteobacteria;unclassified_Betaproteobacteria;                                                       | Bacteria;Proteobacteria;Gammaproteobacteria;Burkholderiales;                                           |
| ASV349 | 0.994362 | 97.9339 | 99  | Bacteria;"Proteobacteria";Alphaproteobacteria;Rhizobiales;Hyphomicrobiaceae;                                                        | Bacteria;Proteobacteria;Alphaproteobacteria;Rhizobiales;Hyphomicrobiaceae;H<br>yphomicrobium;          |
| ASV350 | 0.982072 | 98.3471 | 98  | Bacteria;Cyanobacteria/Chloroplast;Cyanobacteria;                                                                                   | Bacteria;Cyanobacteria;Cyanobacteriia;Cyanobacteriales;Phormidiaceae;Tychon<br>ema CCAP 1459-11B;      |
| ASV351 | 0        | 100     | 100 | Bacteria;"Proteobacteria";Gammaproteobacteria;Pseudomonadales;Pseudomonadaceae;<br>Azotobacter;                                     | Bacteria;Proteobacteria;Gammaproteobacteria;Pseudomonadales;Pseudomonad<br>aceae;Azotobacter;          |
| ASV352 | 0        | 100     | 100 | Bacteria;"Proteobacteria";Alphaproteobacteria;Sphingomonadales;Sphingomonadaceae;<br>Sphingomonas;                                  | Bacteria;Proteobacteria;Alphaproteobacteria;Sphingomonadales;Sphingomonad<br>aceae;Sphingomonas;       |
| ASV353 | 0.983319 | 90.5738 | 98  | Bacteria;"Actinobacteria";Actinobacteria;Acidimicrobiidae;Acidimicrobiales;"Acidimicro<br>bineae";Iamiaceae;unclassified_Iamiaceae; | Bacteria;Actinobacteriota;Acidimicrobiia;Microtrichales;Ilumatobacteraceae;unc<br>ultured;             |

|        |          |             |     |                                                                                                                            |                                                                                                |
|--------|----------|-------------|-----|----------------------------------------------------------------------------------------------------------------------------|------------------------------------------------------------------------------------------------|
| ASV354 | 0.989397 | 97.9<br>424 | 98  | Bacteria;"Proteobacteria";Alphaproteobacteria;Rhodobacterales;Rhodobacteraceae;unclassified_Rhodobacteraceae;              | Bacteria;Proteobacteria;Alphaproteobacteria;Rhodobacterales;Rhodobacteraceae;                  |
| ASV355 | 0        | 100         | 100 | Bacteria;"Actinobacteria";Actinobacteria;Actinobacteridae;Actinomycetales;Micrococceae;Micrococcaceae;Micrococcus;         | Bacteria;Actinobacteriota;Actinobacteria;Micrococcales;Micrococcaceae;Micrococcus;             |
| ASV356 | 0.988083 | 98.7<br>603 | 98  | Bacteria;"Proteobacteria";Alphaproteobacteria;Rhodobacterales;Rhodobacteraceae;                                            | Bacteria;Proteobacteria;Alphaproteobacteria;Rhodobacterales;Rhodobacteraceae;                  |
| ASV357 | 0.978281 | 90.5<br>35  | 97  | Bacteria;"Gemmatimonadetes";Gemmatimonadetes;Gemmatimonadales;Gemmatimonadaceae;Gemmatimonas;                              | Bacteria;Gemmatimonadota;Gemmatimonadetes;Gemmatimonadales;Gemmatimonadaceae;Gemmatimonas;     |
| ASV358 | 0        | 100         | 100 | Bacteria;"Verrucomicrobia";Verrucomicrobiae;Verrucomicrobiales;Verrucomicrobiaceae;unclassified_Verrucomicrobiaceae;       | Bacteria;Verrucomicrobiota;Verrucomicrobiae;Verrucomicrobiales;Verrucomicrobiaceae;uncultured; |
| ASV359 | 0        | 100         | 100 | Bacteria;"Actinobacteria";Actinobacteria;Actinobacteridae;Actinomycetales;Propionibacterineae;Nocardiodaceae;Nocardioidea; | Bacteria;Actinobacteriota;Actinobacteria;Propionibacteriales;Nocardiodaceae;Nocardioidea;      |
| ASV360 | 0.994148 | 95.0<br>413 | 99  | Bacteria;"Verrucomicrobia";Verrucomicrobiae;Verrucomicrobiales;Verrucomicrobiaceae;Luteolibacter;                          | Bacteria;Verrucomicrobiota;Verrucomicrobiae;Verrucomicrobiales;Rubritaleaceae;Luteolibacter;   |
| ASV361 | 0        | 100         | 100 | Bacteria;"Proteobacteria";Alphaproteobacteria;Sphingomonadales;Sphingomonadaceae;Sphingobium;                              | Bacteria;Proteobacteria;Alphaproteobacteria;Sphingomonadales;Sphingomonadaceae;Sphingobium;    |
| ASV362 | 0.994354 | 99.1<br>736 | 99  | Bacteria;"Proteobacteria";Alphaproteobacteria;                                                                             | Bacteria;Proteobacteria;Alphaproteobacteria;Rhizobiales;Pleomorphomonadaceae;Chthonobacter;    |
| ASV363 | 0.994125 | 93.3<br>884 | 99  | Bacteria;Cyanobacteria/Chloroplast;Cyanobacteria;unclassified_Cyanobacteria;                                               | Bacteria;Cyanobacteria;Cyanobacteriia;Cyanobacteriales;Coleofasciculaceae;Wilmottia Ant-Ph58;  |
| ASV364 | 0.994247 | 97.1<br>074 | 99  | Bacteria;"Proteobacteria";Betaproteobacteria;Rhodocyclales;Rhodocyclaceae;                                                 | Bacteria;Proteobacteria;Gammaproteobacteria;Burkholderiales;SC-I-84;                           |
| ASV365 | 0.994247 | 97.5<br>207 | 99  | Bacteria;"Proteobacteria";Alphaproteobacteria;Rhizobiales;unclassified_Rhizobiales;                                        | Bacteria;Proteobacteria;Alphaproteobacteria;Rhizobiales;Beijerinckiaceae;uncultured;           |
| ASV366 | 0.983962 | 94.6<br>502 | 98  | Bacteria;"Proteobacteria";Alphaproteobacteria;Rhizobiales;                                                                 | Bacteria;Proteobacteria;Alphaproteobacteria;Rhizobiales;                                       |
| ASV367 | 0.994358 | 98.3<br>471 | 99  | Bacteria;"Proteobacteria";Alphaproteobacteria;Rhizobiales;Hyphomicrobiaceae;                                               | Bacteria;Proteobacteria;Alphaproteobacteria;Rhizobiales;Hyphomicrobiaceae;                     |
| ASV368 | 0.979932 | 93.8<br>017 | 97  | Bacteria;"Planctomycetes";Planctomycetia;Planctomycetales;Planctomycetaceae;Pirellula;                                     | Bacteria;Planctomycetota;Planctomycetes;Pirellulales;Pirellulaceae;Pirellula;                  |
| ASV369 | 0.994338 | 93.3<br>884 | 99  | Bacteria;Cyanobacteria/Chloroplast;Cyanobacteria;Family IV;GpIV;                                                           | Bacteria;Cyanobacteria;Cyanobacteriia;SepB-3;                                                  |
| ASV370 | 0.9943   | 99.1<br>736 | 99  | Bacteria;"Actinobacteria";Actinobacteria;Actinobacteridae;Actinomycetales;                                                 | Bacteria;Actinobacteriota;Actinobacteria;PeM15;                                                |
| ASV371 | 0.987461 | 98.7<br>603 | 98  | Bacteria;"Planctomycetes";Planctomycetia;Planctomycetales;Planctomycetaceae;unclassified_Planctomycetaceae;                | Bacteria;Planctomycetota;Planctomycetes;Pirellulales;Pirellulaceae;Pir4 lineage;               |
| ASV372 | 0        | 100         | 100 | Bacteria;"Proteobacteria";Betaproteobacteria;Burkholderiales;                                                              | Bacteria;Proteobacteria;Gammaproteobacteria;Burkholderiales;Comamonadaceae;                    |
| ASV373 | 0.994404 | 98.7<br>603 | 99  | Bacteria;"Proteobacteria";Betaproteobacteria;Burkholderiales;Burkholderiales_incertae_sedis;                               | Bacteria;Proteobacteria;Gammaproteobacteria;Burkholderiales;Comamonadaceae;                    |
| ASV374 | 0.994185 | 98.7<br>603 | 99  | Bacteria;"Planctomycetes";Planctomycetia;Planctomycetales;Planctomycetaceae;                                               | Bacteria;Planctomycetota;Planctomycetes;Pirellulales;Pirellulaceae;Pirellula;                  |

|        |          |             |     |                                                                                                                        |                                                                                                             |
|--------|----------|-------------|-----|------------------------------------------------------------------------------------------------------------------------|-------------------------------------------------------------------------------------------------------------|
| ASV375 | 0        | 100         | 100 | Bacteria;"Proteobacteria";Alphaproteobacteria;Rhizobiales;Bradyrhizobiaceae;unclassified_Bradyrhizobiaceae;            | Bacteria;Proteobacteria;Alphaproteobacteria;Rhizobiales;Xanthobacteraceae;uncultured;                       |
| ASV376 | 0        | 100         | 100 | Bacteria;"Actinobacteria";Actinobacteria;Actinobacteridae;Actinomycetales;Micrococciaceae;Microbacteriaceae;Agromyces; | Bacteria;Actinobacteriota;Actinobacteria;Micrococcales;Microbacteriaceae;Agromyces;                         |
| ASV377 | 0        | 100         | 100 | Bacteria;Firmicutes;Bacilli;Bacillales;Bacillaceae 1;Bacillus;                                                         | Bacteria;Firmicutes;Bacilli;Bacillales;Bacillaceae;Bacillus;                                                |
| ASV378 | 0.98793  | 97.9<br>339 | 98  | Bacteria;"Actinobacteria";Actinobacteria;Actinobacteridae;Actinomycetales;                                             | Bacteria;Actinobacteriota;Actinobacteria;                                                                   |
| ASV379 | 0.988101 | 99.1<br>736 | 98  | Bacteria;"Proteobacteria";Alphaproteobacteria;Rhodobacterales;Rhodobacteraceae;                                        | Bacteria;Proteobacteria;Alphaproteobacteria;Rhodobacterales;Rhodobacteraceae;                               |
| ASV380 | 0        | 100         | 100 | Bacteria;"Proteobacteria";Betaproteobacteria;Burkholderiales;Burkholderiales_incertae_sedis;                           | Bacteria;Proteobacteria;Gammaproteobacteria;Burkholderiales;Comamonadaceae;                                 |
| ASV381 | 0.985448 | 97.9<br>339 | 98  | Bacteria;"Proteobacteria";Alphaproteobacteria;Sphingomonadales;Sphingomonadaceae;                                      | Bacteria;Proteobacteria;Alphaproteobacteria;Sphingomonadales;Sphingomonadaceae;uncultured;                  |
| ASV382 | 0.994435 | 99.1<br>736 | 99  | Bacteria;"Proteobacteria";Alphaproteobacteria;Sphingomonadales;Erythrobacteraceae;                                     | Bacteria;Proteobacteria;Alphaproteobacteria;Sphingomonadales;Sphingomonadaceae;                             |
| ASV383 | 0.994131 | 97.1<br>074 | 99  | Bacteria;"Verrucomicrobia";Verrucomicrobiae;Verrucomicrobiales;Verrucomicrobiaceae;unclassified_Verrucomicrobiaceae;   | Bacteria;Verrucomicrobiota;Verrucomicrobiae;Verrucomicrobiales;DEV007;                                      |
| ASV384 | 0        | 100         | 100 | Bacteria;"Proteobacteria";Alphaproteobacteria;Rhizobiales;Methylobacteriaceae;Methylobacterium;                        | Bacteria;Proteobacteria;Alphaproteobacteria;Rhizobiales;Beijerinckiaceae;Methylobacterium-Methylobacterium; |
| ASV385 | 0        | 100         | 100 | Bacteria;"Proteobacteria";Alphaproteobacteria;Sphingomonadales;Sphingomonadaceae;Sphingomonas;                         | Bacteria;Proteobacteria;Alphaproteobacteria;Sphingomonadales;Sphingomonadaceae;Sphingomonas;                |
| ASV386 | 0.994264 | 100         | 99  | Bacteria;"Proteobacteria";Deltaproteobacteria;unclassified_Deltaproteobacteria;                                        | Bacteria;Myxococcota;bacteriap25;                                                                           |
| ASV387 | 0.994372 | 99.5<br>868 | 99  | Bacteria;"Proteobacteria";Alphaproteobacteria;Caulobacterales;Hyphomonadaceae;Hyphomonas;                              | Bacteria;Proteobacteria;Alphaproteobacteria;Caulobacterales;Hyphomonadaceae;Hyphomonas;                     |
| ASV388 | 0        | 100         | 100 | Bacteria;"Proteobacteria";Alphaproteobacteria;Rhodospirillales;Reyranella;                                             | Bacteria;Proteobacteria;Alphaproteobacteria;Reyranellales;Reyranellaceae;Reyranella;                        |
| ASV391 | 0.988909 | 97.5<br>309 | 98  | Bacteria;"Chloroflexi";unclassified_"Chloroflexi";                                                                     | Bacteria;Chloroflexi;KD4-96;                                                                                |
| ASV392 | 0        | 100         | 100 | Bacteria;"Planctomycetes";Planctomycetia;Planctomycetales;Planctomycetaceae;unclassified_Planctomycetaceae;            | Bacteria;Planctomycetota;Planctomycetes;Planctomycetales;Rubinisphaeraceae;SH-PL14;                         |
| ASV393 | 0        | 100         | 100 | Bacteria;"Proteobacteria";Alphaproteobacteria;Rhizobiales;                                                             | Bacteria;Proteobacteria;Alphaproteobacteria;Rhizobiales;Xanthobacteraceae;uncultured;                       |
| ASV394 | 0        | 100         | 100 | Bacteria;"Proteobacteria";Betaproteobacteria;Burkholderiales;Comamonadaceae;Polaromonas;                               | Bacteria;Proteobacteria;Gammaproteobacteria;Burkholderiales;Comamonadaceae;Polaromonas;                     |
| ASV395 | 0        | 100         | 100 | Bacteria;"Actinobacteria";Actinobacteria;Actinobacteridae;Actinomycetales;Corynebacterineae;Nocardiaceae;Gordonia;     | Bacteria;Actinobacteriota;Actinobacteria;Corynebacteriales;Nocardiaceae;Gordonia;                           |
| ASV396 | 0.994456 | 99.5<br>868 | 99  | Bacteria;"Proteobacteria";Betaproteobacteria;Burkholderiales;                                                          | Bacteria;Proteobacteria;Gammaproteobacteria;Burkholderiales;Comamonadaceae;                                 |
| ASV397 | 0.994445 | 99.5<br>868 | 99  | Bacteria;"Bacteroidetes";Flavobacteriia;"Flavobacteriales";Flavobacteriaceae;Flavobacterium;                           | Bacteria;Bacteroidota;Bacteroidia;Flavobacteriales;Flavobacteriaceae;Flavobacterium;                        |
| ASV398 | 0.994331 | 99.1<br>736 | 99  | Bacteria;"Proteobacteria";Gammaproteobacteria;Xanthomonadales;Xanthomonadaceae;Pseudoxanthomonas;                      | Bacteria;Proteobacteria;Gammaproteobacteria;Xanthomonadales;Xanthomonadaceae;Pseudoxanthomonas;             |

|        |          |             |     |                                                                                                                           |                                                                                                         |
|--------|----------|-------------|-----|---------------------------------------------------------------------------------------------------------------------------|---------------------------------------------------------------------------------------------------------|
| ASV399 | 0        | 100         | 100 | Bacteria;"Actinobacteria";Actinobacteria;Actinobacteridae;Actinomycetales;Micrococcin<br>eae;Micrococcaceae;Arthrobacter; | Bacteria;Actinobacteriota;Actinobacteria;Micrococcales;Micrococcaceae;Glutami<br>cibacter;              |
| ASV400 | 0.994304 | 99.5<br>868 | 99  | Bacteria;"Acidobacteria";Acidobacteria_Gp4;Aridibacter;                                                                   | Bacteria;Acidobacteriota;Blastocatellia;Blastocatellales;Blastocatellaceae;                             |
| ASV401 | 0.99415  | 97.1<br>193 | 99  | Bacteria;"Proteobacteria";Alphaproteobacteria;Rhodospirillales;Acetobacteraceae;Roseo<br>monas;                           | Bacteria;Proteobacteria;Alphaproteobacteria;Acetobacterales;Acetobacteraceae;<br>Roseomonas;            |
| ASV402 | 0.991405 | 96.6<br>942 | 99  | Bacteria;"Proteobacteria";Alphaproteobacteria;Sphingomonadales;Sphingomonadaceae;                                         | Bacteria;Proteobacteria;Alphaproteobacteria;Sphingomonadales;Sphingomonad<br>aceae;                     |
| ASV403 | 0.994359 | 99.1<br>736 | 99  | Bacteria;"Proteobacteria";Alphaproteobacteria;Sphingomonadales;Sphingomonadaceae;<br>Sphingomonas;                        | Bacteria;Proteobacteria;Alphaproteobacteria;Sphingomonadales;Sphingomonad<br>aceae;Sphingomonas;        |
| ASV404 | 0.98928  | 98.3<br>471 | 98  | Bacteria;"Acidobacteria";Acidobacteria_Gp6;Gp6;                                                                           | Bacteria;Acidobacteriota;Viciniabacteria;Viciniabacteriales;uncultured;                                 |
| ASV405 | 0.994285 | 99.1<br>736 | 99  | Bacteria;"Proteobacteria";Gammaproteobacteria;Xanthomonadales;Xanthomonadaceae;<br>Arenimonas;                            | Bacteria;Proteobacteria;Gammaproteobacteria;Xanthomonadales;Xanthomonad<br>aceae;Arenimonas;            |
| ASV406 | 0.991539 | 97.9<br>339 | 99  | Bacteria;"Proteobacteria";Betaproteobacteria;unclassified_Betaproteobacteria;                                             | Bacteria;Proteobacteria;Gammaproteobacteria;Burkholderiales;SC-I-84;                                    |
| ASV407 | 0        | 100         | 100 | Bacteria;"Proteobacteria";Alphaproteobacteria;Sphingomonadales;Sphingomonadaceae;<br>Sphingomonas;                        | Bacteria;Proteobacteria;Alphaproteobacteria;Sphingomonadales;Sphingomonad<br>aceae;Sphingomonas;        |
| ASV408 | 0.994399 | 99.5<br>868 | 99  | Bacteria;"Proteobacteria";Alphaproteobacteria;Rhizobiales;                                                                | Bacteria;Proteobacteria;Alphaproteobacteria;Rhizobiales;Rhizobiaceae;                                   |
| ASV409 | 0        | 100         | 100 | Bacteria;"Actinobacteria";Actinobacteria;Rubrobacteridae;Solirubrobacterales;Solirubro<br>bacteraceae;Solirubrobacter;    | Bacteria;Actinobacteriota;Thermoleophilia;Solirubrobacterales;Solirubrobactera<br>ceae;Solirubrobacter; |
| ASV410 | 0.975783 | 97.9<br>339 | 97  | Bacteria;"Proteobacteria";Alphaproteobacteria;Rhizobiales;                                                                | Bacteria;Proteobacteria;Alphaproteobacteria;Rhizobiales;Rhizobiaceae;                                   |
| ASV411 | 0.98868  | 98.3<br>539 | 98  | Bacteria;"Proteobacteria";Alphaproteobacteria;Rhizobiales;Hyphomicrobiaceae;Hypho<br>microbium;                           | Bacteria;Proteobacteria;Alphaproteobacteria;Rhizobiales;Hyphomicrobiaceae;H<br>yphomicrobium;           |
| ASV412 | 0.983231 | 89.2<br>562 | 98  | Bacteria;"Actinobacteria";Actinobacteria;Rubrobacteridae;                                                                 | Bacteria;Actinobacteriota;Thermoleophilia;Gaiellales;uncultured;                                        |
| ASV414 | 0.994449 | 99.1<br>736 | 99  | Bacteria;"Proteobacteria";Gammaproteobacteria;Pseudomonadales;Moraxellaceae;Acine<br>tobacter;                            | Bacteria;Proteobacteria;Gammaproteobacteria;Pseudomonadales;Moraxellaceae<br>;Acinetobacter;            |
| ASV416 | 0.994316 | 97.5<br>207 | 99  | Bacteria;"Bacteroidetes";Sphingobacteriia;"Sphingobacteriales";Chitinophagaceae;                                          | Bacteria;Bacteroidota;Bacteroidia;Chitinophagales;Chitinophagaceae;                                     |
| ASV417 | 0.973772 | 90.4<br>959 | 97  | Bacteria;Cyanobacteria/Chloroplast;Chloroplast;Chloroplast;Bacillariophyta;                                               | Bacteria;Cyanobacteria;Cyanobacteriia;Chloroplast;                                                      |
| ASV418 | 0.983924 | 96.6<br>942 | 98  | Bacteria;"Proteobacteria";Alphaproteobacteria;Sphingomonadales;                                                           | Bacteria;Proteobacteria;Alphaproteobacteria;Sphingomonadales;Sphingomonad<br>aceae;Altererythrobacter;  |
| ASV419 | 0.99437  | 99.1<br>803 | 99  | Bacteria;"Proteobacteria";Alphaproteobacteria;Rhizobiales;                                                                | Bacteria;Proteobacteria;Alphaproteobacteria;Rhizobiales;Beijerinckiaceae;                               |
| ASV420 | 0        | 100         | 100 | Bacteria;"Proteobacteria";Gammaproteobacteria;Xanthomonadales;Xanthomonadaceae;                                           | Bacteria;Proteobacteria;Gammaproteobacteria;Xanthomonadales;Xanthomonad<br>aceae;                       |
| ASV421 | 0        | 100         | 100 | Bacteria;"Actinobacteria";Actinobacteria;Actinobacteridae;Actinomycetales;Corynebacte<br>rineae;Dietziaceae;Dietzia;      | Bacteria;Actinobacteriota;Actinobacteria;Corynebacteriales;Dietziaceae;Dietzia;                         |
| ASV427 | 0        | 100         | 100 | Bacteria;"Acidobacteria";Acidobacteria_Gp4;Aridibacter;                                                                   | Bacteria;Acidobacteriota;Blastocatellia;Blastocatellales;Blastocatellaceae;                             |

|        |          |             |     |                                                                                                               |                                                                                                  |
|--------|----------|-------------|-----|---------------------------------------------------------------------------------------------------------------|--------------------------------------------------------------------------------------------------|
| ASV428 | 0        | 100         | 100 | Bacteria;"Proteobacteria";Alphaproteobacteria;Rhizobiales;Beijerinckiaceae;Camelimonas;                       | Bacteria;Proteobacteria;Alphaproteobacteria;Rhizobiales;Beijerinckiaceae;Camelimonas;            |
| ASV429 | 0.98815  | 97.9<br>339 | 98  | Bacteria;"Proteobacteria";Alphaproteobacteria;Sphingomonadales;Sphingomonadaceae;                             | Bacteria;Proteobacteria;Alphaproteobacteria;Sphingomonadales;Sphingomonadaceae;                  |
| ASV431 | 0        | 100         | 100 | Bacteria;"Proteobacteria";Alphaproteobacteria;Sphingomonadales;Sphingomonadaceae;Sphingomonas;                | Bacteria;Proteobacteria;Alphaproteobacteria;Sphingomonadales;Sphingomonadaceae;Sphingomonas;     |
| ASV432 | 0.994437 | 99.1<br>736 | 99  | Bacteria;"Proteobacteria";Betaproteobacteria;Burkholderiales;Oxalobacteraceae;Noviherbaspirillum;             | Bacteria;Proteobacteria;Gammaproteobacteria;Burkholderiales;Oxalobacteraceae;Noviherbaspirillum; |
| ASV434 | 0.98802  | 98.3<br>471 | 98  | Bacteria;"Proteobacteria";Alphaproteobacteria;Rhodobacterales;Rhodobacteraceae;                               | Bacteria;Proteobacteria;Alphaproteobacteria;Rhodobacterales;Rhodobacteraceae;                    |
| ASV437 | 0.987892 | 98.3<br>471 | 98  | Bacteria;"Proteobacteria";Alphaproteobacteria;Rhodobacterales;Rhodobacteraceae;                               | Bacteria;Proteobacteria;Alphaproteobacteria;Rhodobacterales;Rhodobacteraceae;                    |
| ASV439 | 0        | 100         | 100 | Bacteria;"Proteobacteria";Gammaproteobacteria;Pseudomonadales;Moraxellaceae;Acinetobacter;                    | Bacteria;Proteobacteria;Gammaproteobacteria;Pseudomonadales;Moraxellaceae;Acinetobacter;         |
| ASV440 | 0.963125 | 97.9<br>339 | 96  | Bacteria;"Proteobacteria";Alphaproteobacteria;Rhodobacterales;Rhodobacteraceae;unclassified_Rhodobacteraceae; | Bacteria;Proteobacteria;Alphaproteobacteria;Rhodobacterales;Rhodobacteraceae;                    |
| ASV441 | 0.994372 | 99.1<br>736 | 99  | Bacteria;"Proteobacteria";Gammaproteobacteria;Xanthomonadales;Xanthomonadaceae;Lysobacter;                    | Bacteria;Proteobacteria;Gammaproteobacteria;Xanthomonadales;Xanthomonadaceae;Lysobacter;         |
| ASV442 | 0.960152 | 95.0<br>413 | 96  | Bacteria;"Proteobacteria";Alphaproteobacteria;Rhizobiales;Hyphomicrobiaceae;                                  | Bacteria;Proteobacteria;Alphaproteobacteria;Rhizobiales;Hyphomicrobiaceae;Pedomicrobium;         |
| ASV447 | 0        | 100         | 100 | Bacteria;"Fusobacteria";Fusobacteriia;"Fusobacteriales";"Fusobacteriaceae";Cetobacterium;                     | Bacteria;Fusobacteriota;Fusobacteriia;Fusobacteriales;Fusobacteriaceae;Cetobacterium;            |
| ASV450 | 0.978769 | 95.8<br>678 | 97  | Bacteria;"Proteobacteria";Betaproteobacteria;unclassified_Betaproteobacteria;                                 | Bacteria;Proteobacteria;Gammaproteobacteria;Burkholderiales;Sutterellaceae;AAP99;                |
| ASV451 | 0.977024 | 95.4<br>545 | 97  | Bacteria;"Proteobacteria";Betaproteobacteria;unclassified_Betaproteobacteria;                                 | Bacteria;Proteobacteria;Gammaproteobacteria;Burkholderiales;Sutterellaceae;AAP99;                |
| ASV463 | 0.994056 | 98.3<br>471 | 99  | Unclassified;                                                                                                 | Bacteria;Firmicutes;Bacilli;Alicyclobacillales;Alicyclobacillaceae;Tumebacillus;                 |
| ASV467 | 0.99445  | 98.7<br>603 | 99  | Bacteria;"Bacteroidetes";Flavobacteriia;"Flavobacteriales";Flavobacteriaceae;Chryseobacterium;                | Bacteria;Bacteroidota;Bacteroidia;Flavobacteriales;Weeksellaceae;Chryseobacterium;               |
| ASV485 | 0.963499 | 97.9<br>339 | 96  | Bacteria;"Proteobacteria";Alphaproteobacteria;Rhizobiales;Brucellaceae;Ochrobactrum;                          | Bacteria;Proteobacteria;Alphaproteobacteria;Rhizobiales;                                         |
